# Supplementary material for: Genome-Wide Association Studies for Pasmo Resistance in Flax (<em>Linum Usitatissimum L.</em>)
Source: Preprints.org preprint supplement (doi:10.20944/preprints201811.0336.v1), 2018-11-14
Supplement: Supplementary file 1 [file Supplementary_Figures_S1.docx]

**Figure** **S1** The variances explained by the first 20 principal components (PCs) in the principal component analysis of 258,873 SNPs.

**
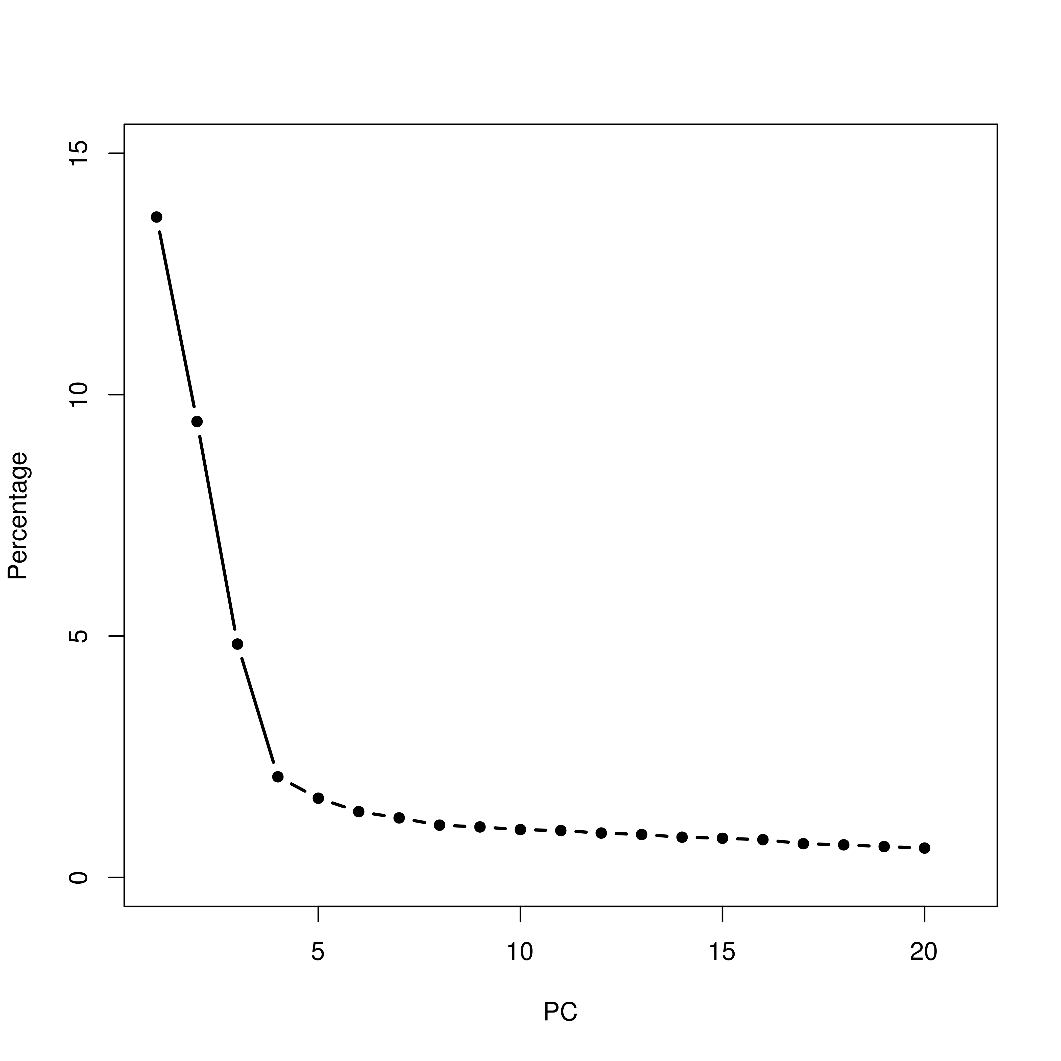
**
