# Supplementary material for: Genome-Wide Association Studies for Pasmo Resistance in Flax (<em>Linum Usitatissimum L.</em>)
Source: Preprints.org preprint supplement (doi:10.20944/preprints201811.0336.v1), 2018-11-14
Supplement: Supplementary file 2 [file Supplementary_Table_S3.xlsx]

## Sheet: final
Table S3. Quantitative trait nucleotides identified using 10 different statistical models for pasmo resistance datasets for five individual years and the average thereof.
SNP	Chrom	BP	SNP	effect	p_value	Year	Method	LOD score
Lu1-9140757	1	9140757	T/C	0.667381	1.22e-08	2012p4	GLM
Lu1-29028213	1	29028213	T/G	-0.642485	8.45e-08	2012p4	GLM
Lu1-29031731	1	29031731	T/C	-0.635051	1.54e-07	2012p4	GLM
Lu2-2532508	2	2532508	A/G	0.554201	4.84e-08	2012p4	GLM
Lu2-2535575	2	2535575	C/T	0.567582	4.93e-08	2012p4	GLM
Lu2-2535928	2	2535928	G/A	-0.583388	8.91e-08	2012p4	GLM
Lu4-14606361	4	14606361	C/T	0.493186	8.93e-08	2012p4	GLM
Lu4-14608434	4	14608434	A/C	-0.543996	9.14e-08	2012p4	GLM
Lu4-14620715	4	14620715	G/T	-0.507661	8.9e-08	2012p4	GLM
Lu4-14620756	4	14620756	A/G	-0.514113	1.77e-07	2012p4	GLM
Lu4-14738243	4	14738243	G/T	-0.744675	3.65e-12	2012p4	GLM
Lu4-14810782	4	14810782	C/A	-0.530768	1.22e-07	2012p4	GLM
Lu4-14822805	4	14822805	T/G	-0.578229	8.49e-09	2012p4	GLM
Lu4-15096801	4	15096801	T/C	-0.554415	1.51e-07	2012p4	GLM
Lu6-2415314	6	2415314	A/G	-0.569628	1.39e-07	2012p4	GLM
Lu6-2417796	6	2417796	A/T	-0.623522	7.53e-08	2012p4	GLM
Lu6-2419373	6	2419373	A/G	-0.646325	4.23e-08	2012p4	GLM
Lu7-2453965	7	2453965	T/C	0.529237	1.87e-07	2012p4	GLM
Lu7-4930164	7	4930164	G/C	-0.717868	1.59e-07	2012p4	GLM
Lu7-5223437	7	5223437	C/T	0.572364	1.53e-07	2012p4	GLM
Lu7-5224075	7	5224075	A/G	0.569291	4.29e-08	2012p4	GLM
Lu8-17230253	8	17230253	C/T	-0.719142	2.07e-08	2012p4	GLM
Lu8-17232045	8	17232045	G/A	0.767806	4.31e-08	2012p4	GLM
Lu8-17237505	8	17237505	G/T	-0.753896	1.99e-08	2012p4	GLM
Lu8-17270785	8	17270785	C/G	-0.76683	5.97e-09	2012p4	GLM
Lu8-18154338	8	18154338	C/A	0.608437	7.47e-08	2012p4	GLM
Lu8-18162558	8	18162558	G/C	0.662126	3.03e-08	2012p4	GLM
Lu8-22902192	8	22902192	A/C	-0.88712	3.94e-08	2012p4	GLM
Lu8-23103891	8	23103891	G/A	0.777903	1.1e-07	2012p4	GLM
Lu8-23104696	8	23104696	C/A	9	1.65e-09	2012p4	GLM
Lu8-23142500	8	23142500	T/C	0.781462	1.56e-07	2012p4	GLM
Lu9-4333365	9	4333365	C/A	0.986876	9.97e-09	2012p4	GLM
Lu11-4201422	11	4201422	T/C	0.73578	5.39e-08	2012p4	GLM
Lu11-16874900	11	16874900	G/A	0.543687	1.35e-07	2012p4	GLM
Lu12-2719326	12	2719326	C/T	-0.686093	7.21e-08	2012p4	GLM
Lu12-15789586	12	15789586	C/T	-0.575827	2.46e-08	2012p4	GLM
Lu12-15789680	12	15789680	C/T	-0.544613	1.49e-07	2012p4	GLM
Lu12-15790233	12	15790233	C/G	-0.539289	9.72e-08	2012p4	GLM
Lu12-15791387	12	15791387	A/T	-0.541555	5.5e-08	2012p4	GLM
Lu13-1832342	13	1832342	G/C	-0.668575	4.78e-08	2012p4	GLM
Lu13-1939630	13	1939630	C/T	0.714119	1.13e-07	2012p4	GLM
Lu13-15803055	13	15803055	G/T	-0.571877	1.79e-07	2012p4	GLM
Lu1-6699909	1	6699909	G/A	0.647981	3.48e-08	2013p4	GLM
Lu3-18957826	3	18957826	A/G	-0.545988	1.17e-07	2013p4	GLM
Lu4-13813266	4	13813266	T/C	1.06778	1.12e-07	2013p4	GLM
Lu4-14213405	4	14213405	G/T	-1.09116	5.58e-08	2013p4	GLM
Lu4-14722131	4	14722131	A/C	-1.04593	1.53e-08	2013p4	GLM
Lu5-4539249	5	4539249	C/T	-0.597769	6.24e-08	2013p4	GLM
Lu5-4808013	5	4808013	C/G	-0.683857	1.69e-07	2013p4	GLM
Lu6-5108428	6	5108428	G/A	-0.742794	1.68e-07	2013p4	GLM
Lu6-5459130	6	5459130	G/A	0.816742	6.44e-08	2013p4	GLM
Lu8-14317356	8	14317356	A/T	-0.668991	2.22e-08	2013p4	GLM
Lu8-15849886	8	15849886	C/T	-0.804585	1.45e-09	2013p4	GLM
Lu8-22908138	8	22908138	C/T	-0.551044	1.89e-07	2013p4	GLM
Lu8-23104696	8	23104696	C/A	0.887943	1.2e-07	2013p4	GLM
Lu9-3999527	9	3999527	G/A	0.638053	5.04e-08	2013p4	GLM
Lu9-4002184	9	4002184	T/C	0.646413	7.4e-09	2013p4	GLM
Lu9-4333365	9	4333365	C/A	0.992888	1.33e-07	2013p4	GLM
Lu9-19999159	9	19999159	C/T	0.700163	1.56e-08	2013p4	GLM
Lu9-20029393	9	20029393	G/A	0.668069	1.49e-07	2013p4	GLM
Lu10-8622099	10	8622099	A/G	-0.521315	8.27e-08	2013p4	GLM
Lu11-4144862	11	4144862	T/C	1.05885	4.09e-08	2013p4	GLM
Lu11-16874998	11	16874998	G/A	-0.627921	1.31e-07	2013p4	GLM
Lu12-5570351	12	5570351	T/C	-0.668421	1.25e-07	2013p4	GLM
Lu12-5573010	12	5573010	G/A	-0.686188	1.16e-07	2013p4	GLM
Lu12-5578883	12	5578883	G/A	-0.740319	1.39e-08	2013p4	GLM
Lu13-1832342	13	1832342	G/C	-0.71101	1.02e-07	2013p4	GLM
Lu13-1917918	13	1917918	T/C	0.545112	1.66e-07	2013p4	GLM
Lu13-2468744	13	2468744	C/A	-0.648281	7.45e-08	2013p4	GLM
Lu1-7750311	1	7750311	A/T	0.679367	1.09e-07	2014p3	GLM
Lu1-7751552	1	7751552	A/G	0.705651	1.62e-08	2014p3	GLM
Lu1-7752867	1	7752867	A/G	0.749466	3.18e-09	2014p3	GLM
Lu1-7752950	1	7752950	A/T	0.724676	2.33e-08	2014p3	GLM
Lu1-7753119	1	7753119	A/C	0.687889	5e-08	2014p3	GLM
Lu1-17832719	1	17832719	A/G	-0.620657	1.36e-07	2014p3	GLM
Lu1-28707496	1	28707496	G/A	0.837877	7.23e-08	2014p3	GLM
Lu1-28783666	1	28783666	G/T	0.631159	6.9e-08	2014p3	GLM
Lu1-28784044	1	28784044	C/T	0.626755	1.6e-07	2014p3	GLM
Lu1-28798871	1	28798871	C/T	-0.71706	3.06e-08	2014p3	GLM
Lu3-2890060	3	2890060	G/A	0.64884	6.27e-08	2014p3	GLM
Lu3-18932081	3	18932081	C/T	-0.858298	1.72e-07	2014p3	GLM
Lu3-22688547	3	22688547	C/G	0.868194	4.78e-08	2014p3	GLM
Lu4-13813266	4	13813266	T/C	1.29755	2.11e-08	2014p3	GLM
Lu4-14213405	4	14213405	G/T	-1.50869	4.94e-11	2014p3	GLM
Lu4-14272818	4	14272818	A/G	-1.18125	1.68e-08	2014p3	GLM
Lu4-14322972	4	14322972	G/T	1.02134	1.5e-08	2014p3	GLM
Lu4-14405719	4	14405719	A/C	-0.711191	2.22e-09	2014p3	GLM
Lu4-14608282	4	14608282	C/T	-0.694621	4.13e-08	2014p3	GLM
Lu4-14608434	4	14608434	A/C	-0.710773	2.62e-08	2014p3	GLM
Lu4-14609120	4	14609120	A/T	-0.750963	3.55e-09	2014p3	GLM
Lu4-14609236	4	14609236	C/T	-0.780269	5.3e-10	2014p3	GLM
Lu4-14611600	4	14611600	C/T	-0.696903	9.94e-08	2014p3	GLM
Lu4-14613023	4	14613023	A/G	-0.71454	5.23e-08	2014p3	GLM
Lu4-14620844	4	14620844	C/T	-0.654888	8.34e-08	2014p3	GLM
Lu4-14738243	4	14738243	G/T	-0.831877	8.57e-10	2014p3	GLM
Lu4-14804680	4	14804680	C/A	0.672909	1.7e-07	2014p3	GLM
Lu5-1648195	5	1648195	G/C	0.797803	7.44e-08	2014p3	GLM
Lu6-2081466	6	2081466	T/C	-0.715767	5.63e-08	2014p3	GLM
Lu6-5397940	6	5397940	G/A	0.916384	1.81e-07	2014p3	GLM
Lu6-5428245	6	5428245	C/T	-0.991677	1.45e-07	2014p3	GLM
Lu6-5459130	6	5459130	G/A	1.01885	4.41e-09	2014p3	GLM
Lu6-12156339	6	12156339	G/T	0.88079	5.26e-08	2014p3	GLM
Lu7-2452981	7	2452981	C/T	-0.668703	8.93e-08	2014p3	GLM
Lu7-2453683	7	2453683	A/G	-0.692354	1.52e-09	2014p3	GLM
Lu7-2453965	7	2453965	T/C	0.708142	2.63e-08	2014p3	GLM
Lu7-2455062	7	2455062	G/C	0.694571	5e-08	2014p3	GLM
Lu7-2455390	7	2455390	G/A	0.743508	1.33e-07	2014p3	GLM
Lu7-5635603	7	5635603	T/C	0.73301	1.47e-08	2014p3	GLM
Lu8-3250095	8	3250095	T/C	1.15578	9.04e-08	2014p3	GLM
Lu8-14317356	8	14317356	A/T	-0.797116	7.12e-09	2014p3	GLM
Lu8-15841943	8	15841943	G/T	-1.01314	1.34e-09	2014p3	GLM
Lu8-16646597	8	16646597	C/T	-1.36661	2.97e-09	2014p3	GLM
Lu8-16694508	8	16694508	C/T	-1.27579	2.83e-08	2014p3	GLM
Lu8-16904194	8	16904194	G/A	1.24361	3.74e-09	2014p3	GLM
Lu8-17237505	8	17237505	G/T	-0.912522	6.73e-08	2014p3	GLM
Lu8-17270785	8	17270785	C/G	-0.96139	6.49e-09	2014p3	GLM
Lu8-19992872	8	19992872	A/G	0.643157	1.37e-07	2014p3	GLM
Lu8-19996289	8	19996289	A/C	0.636255	9.01e-08	2014p3	GLM
Lu8-20000197	8	20000197	C/G	0.671447	2.17e-08	2014p3	GLM
Lu8-20007192	8	20007192	C/T	0.63523	7.52e-08	2014p3	GLM
Lu8-20076947	8	20076947	A/G	-0.907772	4.79e-08	2014p3	GLM
Lu8-20077050	8	20077050	A/G	-0.906201	4.48e-08	2014p3	GLM
Lu8-20081280	8	20081280	A/C	-0.935987	8.92e-08	2014p3	GLM
Lu8-20094286	8	20094286	G/T	-1.00698	3.67e-08	2014p3	GLM
Lu8-22902192	8	22902192	A/C	-1.33903	2.69e-11	2014p3	GLM
Lu8-22908138	8	22908138	C/T	-0.706503	5.97e-09	2014p3	GLM
Lu8-23104696	8	23104696	C/A	1.0963	1.32e-08	2014p3	GLM
Lu8-23142500	8	23142500	T/C	1.08156	6.56e-09	2014p3	GLM
Lu9-4333365	9	4333365	C/A	1.46761	7.5e-12	2014p3	GLM
Lu9-17121993	9	17121993	T/C	0.631183	1.3e-07	2014p3	GLM
Lu11-4144862	11	4144862	T/C	1.16557	1.72e-07	2014p3	GLM
Lu11-4407322	11	4407322	T/G	1.01191	9.47e-09	2014p3	GLM
Lu11-4407386	11	4407386	G/A	1.01614	2.44e-08	2014p3	GLM
Lu11-16816380	11	16816380	G/A	0.652343	1.14e-07	2014p3	GLM
Lu12-6532217	12	6532217	G/A	0.958581	1.26e-09	2014p3	GLM
Lu13-1832342	13	1832342	G/C	-0.806779	1.66e-07	2014p3	GLM
Lu13-1915532	13	1915532	C/G	-0.706163	4.14e-08	2014p3	GLM
Lu13-1917918	13	1917918	T/C	0.82454	3.34e-12	2014p3	GLM
Lu13-2007925	13	2007925	T/C	0.816849	1.92e-10	2014p3	GLM
Lu13-2011686	13	2011686	T/C	0.669206	3.24e-08	2014p3	GLM
Lu13-11860250	13	11860250	G/A	0.838142	9.18e-08	2014p3	GLM
Lu13-15732180	13	15732180	A/C	-0.870253	3.62e-10	2014p3	GLM
Lu13-15733534	13	15733534	A/C	-0.8286	2.52e-08	2014p3	GLM
Lu15-8714776	15	8714776	C/G	-0.778094	3.21e-08	2014p3	GLM
Lu15-14633764	15	14633764	A/C	0.706112	8.96e-08	2014p3	GLM
Lu15-14719354	15	14719354	T/C	0.804935	4.74e-09	2014p3	GLM
Lu1-4886034	1	4886034	C/T	-0.620264	6.17e-08	2015p3	GLM
Lu1-4893566	1	4893566	A/G	-0.692105	1.24e-07	2015p3	GLM
Lu8-3250095	8	3250095	T/C	0.91298	1.03e-07	2015p3	GLM
Lu8-15461096	8	15461096	A/T	-0.773557	8.56e-08	2015p3	GLM
Lu9-4333365	9	4333365	C/A	1.0004	1.14e-08	2015p3	GLM
Lu15-972417	15	972417	G/A	0.734483	1.36e-07	2015p3	GLM
Lu15-974597	15	974597	G/C	0.790808	1.5e-07	2015p3	GLM
Lu15-976617	15	976617	T/A	0.816485	1.48e-07	2015p3	GLM
Lu1-7750388	1	7750388	C/G	0.506052	5.5307e-08	2016p4	GLM
Lu2-1670668	2	1670668	C/T	0.437968	1.86496e-07	2016p4	GLM
Lu2-1671360	2	1671360	A/T	0.432487	1.83724e-07	2016p4	GLM
Lu2-22813337	2	22813337	G/T	-0.474309	9.46954e-08	2016p4	GLM
Lu3-2117937	3	2117937	C/T	-0.567228	1.67904e-07	2016p4	GLM
Lu3-18957826	3	18957826	A/G	-0.469583	3.89747e-09	2016p4	GLM
Lu4-13816083	4	13816083	T/C	0.640154	1.39727e-07	2016p4	GLM
Lu4-14738243	4	14738243	G/T	-0.483085	1.52404e-07	2016p4	GLM
Lu4-14808640	4	14808640	A/G	-0.417927	1.26697e-07	2016p4	GLM
Lu4-14809348	4	14809348	C/T	0.486047	4.74517e-09	2016p4	GLM
Lu4-14810573	4	14810573	G/T	0.471392	2.07273e-09	2016p4	GLM
Lu4-14810782	4	14810782	C/A	-0.462473	5.04148e-08	2016p4	GLM
Lu4-14811256	4	14811256	C/T	-0.444601	3.48429e-08	2016p4	GLM
Lu4-14812223	4	14812223	C/T	0.441584	8.37745e-08	2016p4	GLM
Lu4-14857578	4	14857578	A/G	0.448627	1.10553e-07	2016p4	GLM
Lu6-5459130	6	5459130	G/A	0.694053	2.94058e-09	2016p4	GLM
Lu8-15457893	8	15457893	T/C	0.693221	6.79115e-08	2016p4	GLM
Lu8-15461096	8	15461096	A/T	-0.74882	9.92268e-10	2016p4	GLM
Lu8-15793360	8	15793360	G/T	-0.856758	1.72941e-07	2016p4	GLM
Lu8-15841727	8	15841727	C/T	-0.700482	1.61637e-08	2016p4	GLM
Lu8-15841943	8	15841943	G/T	-0.691192	8.17583e-10	2016p4	GLM
Lu8-15849886	8	15849886	C/T	-0.544311	1.67296e-07	2016p4	GLM
Lu8-15963249	8	15963249	A/G	-0.792052	3.17309e-09	2016p4	GLM
Lu8-16331798	8	16331798	C/G	-0.821788	1.54542e-07	2016p4	GLM
Lu9-1258326	9	1258326	T/A	0.739847	1.20019e-08	2016p4	GLM
Lu9-1414306	9	1414306	G/A	0.745752	2.16494e-10	2016p4	GLM
Lu9-1430465	9	1430465	G/C	0.496777	1.52635e-07	2016p4	GLM
Lu9-1434458	9	1434458	T/A	0.656259	1.6209e-08	2016p4	GLM
Lu9-4333365	9	4333365	C/A	0.875527	1.76404e-09	2016p4	GLM
Lu11-2947405	11	2947405	A/G	-0.62387	7.69793e-08	2016p4	GLM
Lu11-2949141	11	2949141	C/G	-0.596974	1.42287e-07	2016p4	GLM
Lu11-3330783	11	3330783	A/T	-0.671384	1.01028e-07	2016p4	GLM
Lu11-4144862	11	4144862	T/C	0.979612	4.37618e-11	2016p4	GLM
Lu12-1621325	12	1621325	T/A	0.919329	6.51718e-08	2016p4	GLM
Lu13-1832342	13	1832342	G/C	-0.619033	2.04623e-09	2016p4	GLM
Lu13-1919638	13	1919638	G/A	0.715433	9.01546e-08	2016p4	GLM
Lu13-2011686	13	2011686	T/C	0.453424	2.70967e-08	2016p4	GLM
Lu13-2016767	13	2016767	C/G	-0.455898	1.05478e-07	2016p4	GLM
Lu15-972417	15	972417	G/A	0.656193	3.0108e-08	2016p4	GLM
Lu15-974597	15	974597	G/C	0.762894	1.96465e-09	2016p4	GLM
Lu15-976617	15	976617	T/A	0.769069	4.48749e-09	2016p4	GLM
Lu15-3662277	15	3662277	G/C	0.805099	1.31916e-07	2016p4	GLM
Lu15-3668818	15	3668818	T/C	0.882004	2.87897e-08	2016p4	GLM
Lu15-8714776	15	8714776	C/G	-0.551035	5.7331e-09	2016p4	GLM
Lu15-14719354	15	14719354	T/C	0.515825	2.7648e-08	2016p4	GLM
Lu1-6177288	1	6177288	C/A	0.57086	5.15067e-08	Mean	GLM
Lu1-6699909	1	6699909	G/A	0.472824	2.13922e-08	Mean	GLM
Lu1-7748435	1	7748435	C/T	-0.485555	1.99353e-08	Mean	GLM
Lu1-7750045	1	7750045	A/G	0.451226	1.17511e-07	Mean	GLM
Lu1-7750175	1	7750175	G/T	0.554045	4.47203e-11	Mean	GLM
Lu1-7750311	1	7750311	A/T	0.464951	4.82157e-09	Mean	GLM
Lu1-7750388	1	7750388	C/G	0.51831	1.50624e-09	Mean	GLM
Lu1-7751552	1	7751552	A/G	0.423654	5.62482e-08	Mean	GLM
Lu1-7752312	1	7752312	A/G	0.404078	1.54696e-07	Mean	GLM
Lu1-7752867	1	7752867	A/G	0.459335	6.012e-09	Mean	GLM
Lu1-7752950	1	7752950	A/T	0.445757	3.65218e-08	Mean	GLM
Lu1-7753119	1	7753119	A/C	0.459038	4.83955e-09	Mean	GLM
Lu1-9120437	1	9120437	G/A	0.50322	6.30711e-08	Mean	GLM
Lu1-9130861	1	9130861	A/G	-0.530621	1.47122e-07	Mean	GLM
Lu1-9140757	1	9140757	T/C	0.557746	1.0887e-09	Mean	GLM
Lu1-9232234	1	9232234	G/A	0.515081	3.83071e-09	Mean	GLM
Lu1-17120208	1	17120208	C/T	0.46363	9.78377e-08	Mean	GLM
Lu1-18046463	1	18046463	C/T	-0.632489	1.48031e-07	Mean	GLM
Lu1-28776031	1	28776031	A/G	-0.42396	1.72454e-07	Mean	GLM
Lu1-28784044	1	28784044	C/T	0.394437	1.2151e-07	Mean	GLM
Lu2-1670073	2	1670073	T/C	-0.477851	4.24759e-09	Mean	GLM
Lu2-1670668	2	1670668	C/T	0.435839	1.87184e-08	Mean	GLM
Lu2-1671360	2	1671360	A/T	0.406319	1.16501e-07	Mean	GLM
Lu3-18932081	3	18932081	C/T	-0.590132	7.10075e-09	Mean	GLM
Lu3-18957826	3	18957826	A/G	-0.448589	1.12871e-09	Mean	GLM
Lu3-19643168	3	19643168	G/A	0.852291	4.16299e-09	Mean	GLM
Lu3-20781286	3	20781286	A/C	-0.775622	1.04415e-08	Mean	GLM
Lu3-22528184	3	22528184	C/T	-0.53411	5.32931e-08	Mean	GLM
Lu3-22688547	3	22688547	C/G	0.55641	1.93006e-08	Mean	GLM
Lu4-37769	4	37769	G/A	0.608743	1.13894e-07	Mean	GLM
Lu4-13166134	4	13166134	C/A	0.39499	8.91163e-08	Mean	GLM
Lu4-13702763	4	13702763	A/G	0.476457	1.54132e-07	Mean	GLM
Lu4-13779313	4	13779313	T/C	0.739918	4.22772e-08	Mean	GLM
Lu4-13790860	4	13790860	T/C	0.842204	4.12124e-09	Mean	GLM
Lu4-13813266	4	13813266	T/C	0.958191	2.13051e-11	Mean	GLM
Lu4-13815797	4	13815797	C/T	-0.625288	4.14191e-08	Mean	GLM
Lu4-13816083	4	13816083	T/C	0.667592	2.41246e-09	Mean	GLM
Lu4-13828418	4	13828418	A/G	-0.603214	1.31291e-07	Mean	GLM
Lu4-14146207	4	14146207	C/A	-0.442468	4.44652e-08	Mean	GLM
Lu4-14208776	4	14208776	G/A	-0.583891	3.85977e-08	Mean	GLM
Lu4-14209701	4	14209701	C/T	0.550601	7.75625e-08	Mean	GLM
Lu4-14210011	4	14210011	G/T	-0.66999	1.87282e-08	Mean	GLM
Lu4-14213405	4	14213405	G/T	-1.00938	1.37673e-12	Mean	GLM
Lu4-14260714	4	14260714	G/A	-0.510235	5.50622e-08	Mean	GLM
Lu4-14272818	4	14272818	A/G	-0.788942	1.3237e-09	Mean	GLM
Lu4-14284967	4	14284967	C/T	0.409905	1.12625e-07	Mean	GLM
Lu4-14287664	4	14287664	A/G	0.451039	1.15709e-08	Mean	GLM
Lu4-14289303	4	14289303	G/C	-0.442889	4.98186e-08	Mean	GLM
Lu4-14297669	4	14297669	C/T	0.496473	8.32945e-08	Mean	GLM
Lu4-14322972	4	14322972	G/T	0.674926	1.77312e-09	Mean	GLM
Lu4-14444424	4	14444424	G/C	-0.628938	2.99309e-09	Mean	GLM
Lu4-14519872	4	14519872	G/A	-0.548015	1.00042e-07	Mean	GLM
Lu4-14576826	4	14576826	A/G	0.41192	1.18726e-07	Mean	GLM
Lu4-14606361	4	14606361	C/T	0.378646	1.64253e-07	Mean	GLM
Lu4-14606969	4	14606969	A/T	-0.397903	1.56771e-07	Mean	GLM
Lu4-14608282	4	14608282	C/T	-0.429268	5.49176e-08	Mean	GLM
Lu4-14608434	4	14608434	A/C	-0.477343	1.79407e-09	Mean	GLM
Lu4-14609120	4	14609120	A/T	-0.445183	2.14167e-08	Mean	GLM
Lu4-14609236	4	14609236	C/T	-0.472769	1.68481e-09	Mean	GLM
Lu4-14609472	4	14609472	T/G	-0.453443	1.66855e-07	Mean	GLM
Lu4-14610634	4	14610634	G/T	0.42559	1.47712e-07	Mean	GLM
Lu4-14613023	4	14613023	A/G	-0.48102	3.67828e-09	Mean	GLM
Lu4-14615685	4	14615685	A/T	-0.446534	1.14663e-07	Mean	GLM
Lu4-14620844	4	14620844	C/T	-0.398019	1.79846e-07	Mean	GLM
Lu4-14624562	4	14624562	G/T	0.422022	1.2415e-07	Mean	GLM
Lu4-14637101	4	14637101	T/C	-0.644984	1.84919e-08	Mean	GLM
Lu4-14653930	4	14653930	A/G	0.63763	2.55378e-08	Mean	GLM
Lu4-14722131	4	14722131	A/C	-0.847386	1.41272e-10	Mean	GLM
Lu4-14736215	4	14736215	G/T	-0.514218	8.31552e-08	Mean	GLM
Lu4-14737622	4	14737622	G/A	0.54863	6.46991e-09	Mean	GLM
Lu4-14738243	4	14738243	G/T	-0.582126	4.10898e-12	Mean	GLM
Lu4-14758081	4	14758081	G/T	0.456227	1.62274e-07	Mean	GLM
Lu4-14802622	4	14802622	C/T	0.500199	5.89129e-09	Mean	GLM
Lu4-14804680	4	14804680	C/A	0.433084	6.4738e-08	Mean	GLM
Lu4-14808640	4	14808640	A/G	-0.434751	2.34188e-09	Mean	GLM
Lu4-14809348	4	14809348	C/T	0.480416	3.43286e-10	Mean	GLM
Lu4-14810573	4	14810573	G/T	0.445084	9.26557e-10	Mean	GLM
Lu4-14810782	4	14810782	C/A	-0.497178	1.76928e-10	Mean	GLM
Lu4-14811019	4	14811019	A/C	-0.421103	1.03242e-08	Mean	GLM
Lu4-14811256	4	14811256	C/T	-0.444468	2.21615e-09	Mean	GLM
Lu4-14814992	4	14814992	T/C	-0.432509	3.14558e-08	Mean	GLM
Lu4-14822805	4	14822805	T/G	-0.43447	3.54455e-08	Mean	GLM
Lu4-14850494	4	14850494	T/C	-0.462015	2.57602e-08	Mean	GLM
Lu4-14857578	4	14857578	A/G	0.426795	4.63558e-08	Mean	GLM
Lu4-14884955	4	14884955	C/T	-0.610384	7.46162e-08	Mean	GLM
Lu5-1646381	5	1646381	C/A	0.773735	1.29272e-07	Mean	GLM
Lu5-3667639	5	3667639	C/T	-0.394215	1.22845e-07	Mean	GLM
Lu5-4848063	5	4848063	A/G	-0.627243	1.75217e-08	Mean	GLM
Lu5-4858045	5	4858045	C/T	-0.772858	1.58948e-07	Mean	GLM
Lu5-13500692	5	13500692	G/A	0.636658	1.32427e-08	Mean	GLM
Lu5-14838893	5	14838893	G/A	0.629906	1.70263e-09	Mean	GLM
Lu6-2081466	6	2081466	T/C	-0.477579	5.58255e-09	Mean	GLM
Lu6-5108428	6	5108428	G/A	-0.551405	6.39697e-08	Mean	GLM
Lu6-5397940	6	5397940	G/A	0.616411	1.63543e-08	Mean	GLM
Lu6-5428245	6	5428245	C/T	-0.661059	1.71684e-08	Mean	GLM
Lu6-5459130	6	5459130	G/A	0.750503	2.5283e-12	Mean	GLM
Lu6-5837358	6	5837358	C/T	-0.577132	1.6257e-07	Mean	GLM
Lu6-9867044	6	9867044	C/G	-0.72074	1.99293e-08	Mean	GLM
Lu6-10597100	6	10597100	C/T	-0.757965	1.40839e-08	Mean	GLM
Lu6-14738507	6	14738507	C/T	-0.857149	8.17056e-09	Mean	GLM
Lu6-15455712	6	15455712	A/G	-0.717529	1.10389e-08	Mean	GLM
Lu6-15506329	6	15506329	C/T	-0.726797	1.07839e-07	Mean	GLM
Lu6-15506450	6	15506450	A/G	-0.769337	3.62322e-08	Mean	GLM
Lu6-16415796	6	16415796	C/T	0.417898	9.97148e-08	Mean	GLM
Lu6-16417080	6	16417080	C/G	0.447349	2.56981e-09	Mean	GLM
Lu6-17089354	6	17089354	G/A	0.730309	6.71027e-08	Mean	GLM
Lu7-2452149	7	2452149	C/T	-0.386361	9.50569e-08	Mean	GLM
Lu7-2452981	7	2452981	C/T	-0.486314	3.31186e-10	Mean	GLM
Lu7-2453683	7	2453683	A/G	-0.453994	1.85764e-10	Mean	GLM
Lu7-2453965	7	2453965	T/C	0.461022	5.82576e-09	Mean	GLM
Lu7-2455062	7	2455062	G/C	0.460677	6.06064e-09	Mean	GLM
Lu7-2455390	7	2455390	G/A	0.482059	3.9331e-08	Mean	GLM
Lu7-2455435	7	2455435	A/G	-0.408268	1.09845e-08	Mean	GLM
Lu7-2491132	7	2491132	G/A	0.472047	1.31081e-09	Mean	GLM
Lu7-5637510	7	5637510	A/G	-0.458208	9.63684e-08	Mean	GLM
Lu8-3250095	8	3250095	T/C	0.886761	2.97872e-11	Mean	GLM
Lu8-13424145	8	13424145	C/T	0.621428	2.64014e-08	Mean	GLM
Lu8-14317356	8	14317356	A/T	-0.584648	6.3018e-12	Mean	GLM
Lu8-14331564	8	14331564	T/C	0.546822	3.98441e-08	Mean	GLM
Lu8-14340718	8	14340718	G/A	0.457962	1.71999e-07	Mean	GLM
Lu8-14340900	8	14340900	G/A	0.435492	5.16235e-08	Mean	GLM
Lu8-15461096	8	15461096	A/T	-0.695935	8.26445e-10	Mean	GLM
Lu8-15531687	8	15531687	C/T	-0.413372	1.55888e-07	Mean	GLM
Lu8-15793360	8	15793360	G/T	-0.96239	1.50531e-10	Mean	GLM
Lu8-15830073	8	15830073	C/T	-0.502221	4.3533e-08	Mean	GLM
Lu8-15837449	8	15837449	A/T	-0.633175	4.23699e-08	Mean	GLM
Lu8-15841727	8	15841727	C/T	-0.744789	6.16208e-11	Mean	GLM
Lu8-15841885	8	15841885	T/C	0.615098	5.54178e-08	Mean	GLM
Lu8-15841943	8	15841943	G/T	-0.734642	1.09915e-12	Mean	GLM
Lu8-15847662	8	15847662	A/C	-0.706475	7.75813e-08	Mean	GLM
Lu8-15849886	8	15849886	C/T	-0.638134	1.94044e-11	Mean	GLM
Lu8-15963010	8	15963010	A/T	-0.734816	1.58484e-08	Mean	GLM
Lu8-15963150	8	15963150	G/T	-0.751705	3.49259e-08	Mean	GLM
Lu8-15963249	8	15963249	A/G	-0.788385	1.58484e-10	Mean	GLM
Lu8-15991760	8	15991760	C/T	-0.455453	1.14282e-09	Mean	GLM
Lu8-16331798	8	16331798	C/G	-0.921231	1.39046e-10	Mean	GLM
Lu8-16366918	8	16366918	C/T	-0.618917	9.64095e-08	Mean	GLM
Lu8-16545740	8	16545740	C/T	-0.621394	1.12395e-07	Mean	GLM
Lu8-16646597	8	16646597	C/T	-0.808657	1.94436e-08	Mean	GLM
Lu8-16694508	8	16694508	C/T	-0.750449	1.73891e-07	Mean	GLM
Lu8-16904194	8	16904194	G/A	0.706193	8.95726e-08	Mean	GLM
Lu8-17230253	8	17230253	C/T	-0.536943	9.74215e-08	Mean	GLM
Lu8-17232045	8	17232045	G/A	0.619438	1.62414e-08	Mean	GLM
Lu8-17237505	8	17237505	G/T	-0.618175	3.92295e-09	Mean	GLM
Lu8-17270785	8	17270785	C/G	-0.597136	7.44843e-09	Mean	GLM
Lu8-17271798	8	17271798	G/A	0.607393	4.73401e-08	Mean	GLM
Lu8-17749357	8	17749357	G/A	0.644366	9.97213e-08	Mean	GLM
Lu8-18152249	8	18152249	A/G	-0.542797	1.42439e-07	Mean	GLM
Lu8-18152847	8	18152847	C/G	-0.485375	1.23697e-07	Mean	GLM
Lu8-18154338	8	18154338	C/A	0.564193	1.35992e-10	Mean	GLM
Lu8-18162558	8	18162558	G/C	0.590546	2.18546e-10	Mean	GLM
Lu8-18207790	8	18207790	G/A	0.420241	4.2114e-08	Mean	GLM
Lu8-18251174	8	18251174	G/A	0.669691	1.01725e-07	Mean	GLM
Lu8-18447612	8	18447612	T/C	0.61971	5.82469e-08	Mean	GLM
Lu8-20000197	8	20000197	C/G	0.392489	1.65985e-07	Mean	GLM
Lu8-20030216	8	20030216	A/G	0.40205	5.78928e-08	Mean	GLM
Lu8-20031082	8	20031082	C/T	0.425449	2.74993e-08	Mean	GLM
Lu8-20031626	8	20031626	T/C	-0.475408	1.32913e-08	Mean	GLM
Lu8-20031761	8	20031761	A/G	0.452119	5.1393e-09	Mean	GLM
Lu8-20031882	8	20031882	C/T	0.434913	6.25608e-09	Mean	GLM
Lu8-20077050	8	20077050	A/G	-0.552335	9.14501e-08	Mean	GLM
Lu8-20081280	8	20081280	A/C	-0.590904	6.05238e-08	Mean	GLM
Lu8-20094286	8	20094286	G/T	-0.633349	2.75453e-08	Mean	GLM
Lu8-20548970	8	20548970	C/T	-0.75376	1.6489e-08	Mean	GLM
Lu8-22902192	8	22902192	A/C	-0.869155	3.52328e-12	Mean	GLM
Lu8-22908138	8	22908138	C/T	-0.426911	1.80399e-08	Mean	GLM
Lu8-22916087	8	22916087	G/T	-0.559692	6.87e-08	Mean	GLM
Lu8-22929410	8	22929410	C/T	-0.658993	7.9379e-09	Mean	GLM
Lu8-23103891	8	23103891	G/A	0.702504	7.22304e-10	Mean	GLM
Lu8-23104696	8	23104696	C/A	0.835173	2.13694e-12	Mean	GLM
Lu8-23142500	8	23142500	T/C	0.74668	1.05148e-10	Mean	GLM
Lu9-1106034	9	1106034	G/A	0.651824	5.30212e-08	Mean	GLM
Lu9-1249332	9	1249332	G/A	0.647618	1.18673e-07	Mean	GLM
Lu9-1250164	9	1250164	G/A	0.680615	2.69698e-08	Mean	GLM
Lu9-1258326	9	1258326	T/A	0.74914	3.68545e-10	Mean	GLM
Lu9-1414306	9	1414306	G/A	0.71866	3.36667e-11	Mean	GLM
Lu9-1434458	9	1434458	T/A	0.653875	1.02771e-09	Mean	GLM
Lu9-1452214	9	1452214	T/C	0.440307	1.74132e-07	Mean	GLM
Lu9-1896658	9	1896658	G/A	0.866151	9.96798e-10	Mean	GLM
Lu9-2375176	9	2375176	A/G	-0.873485	3.36383e-10	Mean	GLM
Lu9-4002184	9	4002184	T/C	0.428704	1.07726e-07	Mean	GLM
Lu9-4077083	9	4077083	T/C	0.425471	8.81515e-08	Mean	GLM
Lu9-4333365	9	4333365	C/A	1.07458	3.70015e-16	Mean	GLM
Lu9-5595092	9	5595092	A/G	-0.60878	1.39025e-08	Mean	GLM
Lu9-6270376	9	6270376	A/G	-0.494605	1.74981e-07	Mean	GLM
Lu9-17014192	9	17014192	T/C	0.843926	8.90486e-09	Mean	GLM
Lu9-18512209	9	18512209	C/T	-0.463913	1.21884e-07	Mean	GLM
Lu9-19847245	9	19847245	G/A	-0.520165	1.22142e-07	Mean	GLM
Lu9-19847832	9	19847832	G/A	-0.505911	1.42454e-07	Mean	GLM
Lu9-19855693	9	19855693	G/A	0.741993	4.40577e-09	Mean	GLM
Lu9-19857367	9	19857367	G/A	0.774772	1.72438e-09	Mean	GLM
Lu9-19957506	9	19957506	G/A	-0.493843	1.55527e-07	Mean	GLM
Lu9-19965692	9	19965692	C/T	0.53225	1.72462e-07	Mean	GLM
Lu9-19987445	9	19987445	C/T	0.559078	1.26793e-07	Mean	GLM
Lu9-19999159	9	19999159	C/T	0.493669	3.03854e-08	Mean	GLM
Lu9-20001213	9	20001213	A/T	0.461378	9.07476e-08	Mean	GLM
Lu10-979111	10	979111	G/A	0.700743	7.10219e-08	Mean	GLM
Lu10-5757355	10	5757355	T/G	-0.419802	1.24784e-07	Mean	GLM
Lu10-8700793	10	8700793	A/G	-0.408924	3.34343e-08	Mean	GLM
Lu10-13813125	10	13813125	G/A	-0.485402	6.06733e-08	Mean	GLM
Lu10-16600285	10	16600285	G/A	0.384919	1.77575e-07	Mean	GLM
Lu10-16903790	10	16903790	C/T	0.453436	1.75837e-07	Mean	GLM
Lu10-16903827	10	16903827	G/C	-0.427922	6.51221e-08	Mean	GLM
Lu11-2521185	11	2521185	G/A	0.671794	9.87418e-08	Mean	GLM
Lu11-2947405	11	2947405	A/G	-0.619134	7.36257e-09	Mean	GLM
Lu11-4144862	11	4144862	T/C	0.988539	4.76659e-13	Mean	GLM
Lu11-4151410	11	4151410	T/A	0.851841	7.82045e-09	Mean	GLM
Lu11-4162321	11	4162321	G/A	0.757943	1.82207e-08	Mean	GLM
Lu11-4201422	11	4201422	T/C	0.611299	7.39411e-09	Mean	GLM
Lu11-4339807	11	4339807	G/C	0.488426	4.30475e-09	Mean	GLM
Lu11-4407322	11	4407322	T/G	0.585123	1.12074e-07	Mean	GLM
Lu11-5976511	11	5976511	A/T	-0.461108	8.47684e-08	Mean	GLM
Lu11-16874900	11	16874900	G/A	0.476036	3.18876e-09	Mean	GLM
Lu11-19326876	11	19326876	T/A	0.647453	1.65929e-07	Mean	GLM
Lu12-1621325	12	1621325	T/A	0.937134	2.22085e-09	Mean	GLM
Lu12-2208674	12	2208674	C/G	0.605537	8.38016e-08	Mean	GLM
Lu12-2719326	12	2719326	C/T	-0.578664	5.98546e-09	Mean	GLM
Lu12-2724279	12	2724279	G/A	0.584148	4.74823e-08	Mean	GLM
Lu12-5561961	12	5561961	T/C	-0.504832	5.3033e-08	Mean	GLM
Lu12-5568270	12	5568270	C/A	-0.49881	8.6873e-08	Mean	GLM
Lu12-5570067	12	5570067	T/C	-0.533525	1.78509e-08	Mean	GLM
Lu12-5570351	12	5570351	T/C	-0.487007	8.35493e-08	Mean	GLM
Lu12-5573010	12	5573010	G/A	-0.545739	3.93673e-09	Mean	GLM
Lu12-5578883	12	5578883	G/A	-0.540931	7.89598e-09	Mean	GLM
Lu12-5580187	12	5580187	G/A	-0.528945	5.30436e-08	Mean	GLM
Lu12-5581710	12	5581710	G/A	-0.516676	1.0779e-08	Mean	GLM
Lu12-5696207	12	5696207	C/T	-0.848763	1.07617e-07	Mean	GLM
Lu12-5795458	12	5795458	A/G	0.498171	5.92288e-08	Mean	GLM
Lu12-6207708	12	6207708	G/A	0.611025	1.33766e-07	Mean	GLM
Lu12-6532217	12	6532217	G/A	0.584213	3.04177e-09	Mean	GLM
Lu12-15686833	12	15686833	A/G	-0.751608	2.87863e-09	Mean	GLM
Lu12-15758393	12	15758393	G/A	-0.512371	1.03469e-08	Mean	GLM
Lu12-15759574	12	15759574	C/G	0.476786	3.86001e-09	Mean	GLM
Lu12-15759999	12	15759999	A/G	0.422297	6.33759e-08	Mean	GLM
Lu12-15789586	12	15789586	C/T	-0.424132	1.70822e-07	Mean	GLM
Lu12-15789680	12	15789680	C/T	-0.432408	1.00101e-07	Mean	GLM
Lu12-15829115	12	15829115	A/G	-0.529205	8.24933e-08	Mean	GLM
Lu12-16036187	12	16036187	A/G	-0.559224	1.62769e-07	Mean	GLM
Lu12-16056974	12	16056974	A/C	-0.590193	1.02993e-07	Mean	GLM
Lu13-1832342	13	1832342	G/C	-0.666291	1.95048e-12	Mean	GLM
Lu13-1915532	13	1915532	C/G	-0.477685	2.32246e-09	Mean	GLM
Lu13-1917918	13	1917918	T/C	0.496339	1.99518e-11	Mean	GLM
Lu13-1919638	13	1919638	G/A	0.676887	4.4613e-08	Mean	GLM
Lu13-1939630	13	1939630	C/T	0.646641	6.70195e-10	Mean	GLM
Lu13-1950067	13	1950067	A/G	0.505963	1.42104e-07	Mean	GLM
Lu13-1950274	13	1950274	A/C	0.447329	4.58419e-08	Mean	GLM
Lu13-1950313	13	1950313	G/A	-0.488258	4.15415e-08	Mean	GLM
Lu13-1950318	13	1950318	G/T	0.49468	1.1895e-08	Mean	GLM
Lu13-2005733	13	2005733	T/C	0.38883	5.93757e-08	Mean	GLM
Lu13-2005791	13	2005791	A/T	-0.436033	2.17521e-08	Mean	GLM
Lu13-2007694	13	2007694	C/A	0.422633	1.54846e-08	Mean	GLM
Lu13-2007830	13	2007830	G/A	0.376843	1.64801e-07	Mean	GLM
Lu13-2007925	13	2007925	T/C	0.534286	2.09253e-11	Mean	GLM
Lu13-2008177	13	2008177	A/C	-0.42839	2.18997e-08	Mean	GLM
Lu13-2008254	13	2008254	G/A	0.373476	1.0624e-07	Mean	GLM
Lu13-2008290	13	2008290	C/A	0.419625	3.86523e-09	Mean	GLM
Lu13-2011671	13	2011671	A/G	-0.468841	8.43023e-09	Mean	GLM
Lu13-2011686	13	2011686	T/C	0.48562	8.9129e-11	Mean	GLM
Lu13-2012060	13	2012060	T/G	0.427666	2.28773e-08	Mean	GLM
Lu13-2012283	13	2012283	C/G	-0.444202	6.62089e-08	Mean	GLM
Lu13-2016767	13	2016767	C/G	-0.44321	2.15921e-08	Mean	GLM
Lu13-2017210	13	2017210	C/T	0.455492	1.57439e-08	Mean	GLM
Lu13-2017235	13	2017235	C/G	0.439928	3.3972e-08	Mean	GLM
Lu13-2017392	13	2017392	G/A	-0.392453	1.48289e-07	Mean	GLM
Lu13-2019495	13	2019495	T/C	-0.402331	3.64499e-08	Mean	GLM
Lu13-2145067	13	2145067	C/T	-0.43463	1.73539e-07	Mean	GLM
Lu13-2461075	13	2461075	C/A	-0.47157	1.12609e-07	Mean	GLM
Lu13-2490903	13	2490903	G/A	-0.545458	1.30994e-07	Mean	GLM
Lu13-14282050	13	14282050	C/T	0.462914	1.22739e-07	Mean	GLM
Lu13-14295593	13	14295593	G/C	-0.523007	1.18337e-07	Mean	GLM
Lu13-14298794	13	14298794	C/G	0.541864	1.44004e-08	Mean	GLM
Lu13-14323872	13	14323872	C/T	0.536879	1.03957e-07	Mean	GLM
Lu13-15568148	13	15568148	C/T	0.396993	1.29137e-07	Mean	GLM
Lu13-15568717	13	15568717	T/A	-0.419068	1.7673e-07	Mean	GLM
Lu13-15568881	13	15568881	C/G	0.404922	6.8392e-08	Mean	GLM
Lu13-15715094	13	15715094	A/C	-0.413812	1.57137e-07	Mean	GLM
Lu13-15803055	13	15803055	G/T	-0.450949	1.48336e-07	Mean	GLM
Lu13-15804798	13	15804798	C/T	-0.470337	1.46985e-07	Mean	GLM
Lu14-17310488	14	17310488	G/A	0.687224	6.56467e-08	Mean	GLM
Lu14-18895796	14	18895796	G/A	0.423714	1.58419e-07	Mean	GLM
Lu15-972417	15	972417	G/A	0.633318	6.98696e-09	Mean	GLM
Lu15-974597	15	974597	G/C	0.760582	8.39572e-11	Mean	GLM
Lu15-976617	15	976617	T/A	0.74977	5.74948e-10	Mean	GLM
Lu15-988037	15	988037	T/G	0.461407	1.16924e-07	Mean	GLM
Lu15-988547	15	988547	T/C	0.435244	1.47644e-07	Mean	GLM
Lu15-992553	15	992553	C/T	-0.445579	1.41338e-07	Mean	GLM
Lu15-993525	15	993525	G/A	0.411625	1.58122e-07	Mean	GLM
Lu15-995626	15	995626	T/A	0.404636	1.89801e-07	Mean	GLM
Lu15-2544402	15	2544402	A/C	-0.512748	1.1848e-07	Mean	GLM
Lu15-3661936	15	3661936	G/A	0.53569	1.72875e-08	Mean	GLM
Lu15-3662277	15	3662277	G/C	0.880839	3.19015e-10	Mean	GLM
Lu15-3668818	15	3668818	T/C	0.857954	4.99622e-09	Mean	GLM
Lu15-3723148	15	3723148	G/A	0.410706	1.58629e-07	Mean	GLM
Lu15-8714776	15	8714776	C/G	-0.575003	3.76486e-11	Mean	GLM
Lu15-14719354	15	14719354	T/C	0.508397	2.91868e-09	Mean	GLM
Lu9-4333365	9	4333365	C/A	0.870081	9.51976e-08	Mean	MLM
Lu4-14738243	4	14738243	G/T		4.9e-08	2012p4	GEMMA
Lu4-14213405	4	14213405	G/T		1.45e-07	2014p3	GEMMA
Lu9-4333365	9	4333365	C/A		9.56e-08	2014p3	GEMMA
Lu13-15732180	13	15732180	A/C		1.73e-07	2014p3	GEMMA
Lu9-1414306	9	1414306	G/A		9.40984e-08	2016p4	GEMMA
Lu11-4144862	11	4144862	T/C		6.98564e-09	2016p4	GEMMA
Lu9-4333365	9	4333365	C/A		1.64071e-09	mean	GEMMA
Lu11-4144862	11	4144862	T/C		3.8041e-08	mean	GEMMA
Lu1-10846422	1	10846422	A/G	-0.3146		2012p4	mrMLM	3.4454
Lu4-381329	4	381329	C/T	0.352		2012p4	mrMLM	3.2422
Lu4-14738243	4	14738243	G/T	0.7062		2012p4	mrMLM	21.2481
Lu5-15424935	5	15424935	C/T	0.4611		2012p4	mrMLM	3.5363
Lu7-15181287	7	15181287	T/A	-0.2339		2012p4	mrMLM	5.048
Lu8-498382	8	498382	G/A	0.5717		2012p4	mrMLM	6.0437
Lu9-2560789	9	2560789	T/C	-0.302		2012p4	mrMLM	5.3846
Lu9-5907414	9	5907414	G/T	-0.346		2012p4	mrMLM	5.8415
Lu9-6260030	9	6260030	A/G	0.3232		2012p4	mrMLM	4.9732
Lu9-15938050	9	15938050	T/C	0.4142		2012p4	mrMLM	5.7387
Lu9-16100896	9	16100896	G/A	-0.3884		2012p4	mrMLM	4.0651
Lu9-17822959	9	17822959	C/G	0.3165		2012p4	mrMLM	4.8053
Lu12-20419874	12	20419874	G/T	-0.4885		2012p4	mrMLM	6.5955
Lu13-16092588	13	16092588	G/T	0.6026		2012p4	mrMLM	9.2281
Lu13-17063922	13	17063922	T/A	0.2979		2012p4	mrMLM	3.4822
Lu13-19254502	13	19254502	T/C	0.4148		2012p4	mrMLM	4.673
Lu14-3525674	14	3525674	A/C	-0.2857		2012p4	mrMLM	3.7654
Lu14-16563229	14	16563229	G/A	0.2163		2012p4	mrMLM	3.2137
Lu15-11671852	15	11671852	C/G	0.2764		2012p4	mrMLM	3.4095
Lu15-13937880	15	13937880	T/C	-0.2016		2012p4	mrMLM	3.0731
Lu1-17921907	1	17921907	A/G	0.2707		2013p4	mrMLM	4.4794
Lu1-21633646	1	21633646	G/A	0.3743		2013p4	mrMLM	4.4377
Lu3-4341892	3	4341892	A/G	0.3307		2013p4	mrMLM	4.6952
Lu4-13166134	4	13166134	C/A	-0.2653		2013p4	mrMLM	3.9185
Lu5-1383759	5	1383759	G/T	0.2724		2013p4	mrMLM	3.2888
Lu6-9272170	6	9272170	T/C	0.2794		2013p4	mrMLM	4.84
Lu6-17054363	6	17054363	T/G	-0.3373		2013p4	mrMLM	5.9968
Lu8-14211289	8	14211289	C/T	0.4714		2013p4	mrMLM	8.2119
Lu8-22619596	8	22619596	A/C	0.3328		2013p4	mrMLM	4.9969
Lu9-4104973	9	4104973	C/T	-0.4704		2013p4	mrMLM	7.769
Lu9-12304031	9	12304031	A/G	0.3433		2013p4	mrMLM	5.4453
Lu9-17912104	9	17912104	C/T	0.2453		2013p4	mrMLM	3.246
Lu10-8622099	10	8622099	A/G	0.2791		2013p4	mrMLM	4.7723
Lu10-10349278	10	10349278	G/A	-0.2666		2013p4	mrMLM	3.5083
Lu10-12189614	10	12189614	A/G	-0.5411		2013p4	mrMLM	4.8857
Lu12-16507610	12	16507610	G/A	0.314		2013p4	mrMLM	3.5829
Lu13-2227366	13	2227366	C/T	-0.52		2013p4	mrMLM	6.6703
Lu13-14299019	13	14299019	A/G	0.3345		2013p4	mrMLM	6.2302
Lu13-17924155	13	17924155	A/G	-0.3419		2013p4	mrMLM	5.6476
Lu14-2644827	14	2644827	G/A	0.2976		2013p4	mrMLM	5.3007
Lu14-4551657	14	4551657	T/C	0.6716		2013p4	mrMLM	6.6539
Lu14-10715726	14	10715726	G/T	-0.2821		2013p4	mrMLM	3.5327
Lu14-13320967	14	13320967	A/G	-0.334		2013p4	mrMLM	3.8847
Lu14-15197307	14	15197307	T/A	0.3546		2013p4	mrMLM	5.1181
Lu14-15685576	14	15685576	C/G	0.4021		2013p4	mrMLM	5.3332
Lu15-1004292	15	1004292	G/A	0.3656		2013p4	mrMLM	4.5267
Lu1-18741837	1	18741837	C/T	0.5157		2014p3	mrMLM	6.2593
Lu2-2643451	2	2643451	C/T	-0.5766		2014p3	mrMLM	6.8526
Lu2-19365052	2	19365052	G/A	0.4842		2014p3	mrMLM	6.7656
Lu3-18559066	3	18559066	C/T	0.4967		2014p3	mrMLM	5.9979
Lu4-1837190	4	1837190	A/G	0.3547		2014p3	mrMLM	3.732
Lu4-14355445	4	14355445	A/G	0.3131		2014p3	mrMLM	3.2299
Lu8-15119358	8	15119358	C/T	0.3096		2014p3	mrMLM	3.0275
Lu8-17237505	8	17237505	G/T	-0.7018		2014p3	mrMLM	10.3158
Lu9-4333365	9	4333365	C/A	1.149		2014p3	mrMLM	11.0958
Lu9-9646568	9	9646568	A/C	0.5012		2014p3	mrMLM	6.2012
Lu11-17175819	11	17175819	A/C	0.5713		2014p3	mrMLM	4.951
Lu12-6967588	12	6967588	G/A	0.3843		2014p3	mrMLM	3.0807
Lu13-4081141	13	4081141	C/T	0.6074		2014p3	mrMLM	5.6779
Lu13-5613625	13	5613625	C/T	0.2889		2014p3	mrMLM	3.2679
Lu13-13103934	13	13103934	C/T	-0.5912		2014p3	mrMLM	7.1427
Lu13-15732180	13	15732180	A/C	0.5838		2014p3	mrMLM	9.0609
Lu14-2330645	14	2330645	C/T	0.4753		2014p3	mrMLM	9.3868
Lu14-4418956	14	4418956	C/T	0.3045		2014p3	mrMLM	3.2443
Lu2-3803775	2	3803775	C/T	0.3226		2015p3	mrMLM	5.3545
Lu2-5746268	2	5746268	A/T	0.4115		2015p3	mrMLM	4.821
Lu2-21823121	2	21823121	T/C	-0.3554		2015p3	mrMLM	4.7821
Lu3-1814258	3	1814258	T/C	-0.3395		2015p3	mrMLM	3.3213
Lu3-22646703	3	22646703	C/T	-0.4825		2015p3	mrMLM	6.6734
Lu5-469937	5	469937	G/C	0.4554		2015p3	mrMLM	7.241
Lu5-3575865	5	3575865	C/G	-0.367		2015p3	mrMLM	3.0694
Lu5-16087971	5	16087971	C/T	-0.3323		2015p3	mrMLM	3.7315
Lu8-8699101	8	8699101	T/C	0.3109		2015p3	mrMLM	3.7038
Lu8-15603657	8	15603657	C/T	-0.3812		2015p3	mrMLM	4.1511
Lu10-15517661	10	15517661	A/G	0.4822		2015p3	mrMLM	7.0285
Lu13-3720348	13	3720348	C/G	0.5281		2015p3	mrMLM	7.6058
Lu13-5571197	13	5571197	C/T	0.4754		2015p3	mrMLM	8.5782
Lu13-15803055	13	15803055	G/T	0.4272		2015p3	mrMLM	5.0211
Lu3-17811882	3	17811882	C/T	0.2999		2016P4	mrMLM	4.9136
Lu4-14841649	4	14841649	C/T	-0.4515		2016P4	mrMLM	6.8407
Lu5-16725467	5	16725467	A/G	0.3454		2016P4	mrMLM	3.911
Lu7-17229239	7	17229239	G/T	-0.2761		2016P4	mrMLM	5.0309
Lu8-22525597	8	22525597	C/T	-0.252		2016P4	mrMLM	4.0844
Lu9-1414306	9	1414306	G/A	0.5475		2016P4	mrMLM	6.498
Lu10-15493648	10	15493648	G/A	-0.321		2016P4	mrMLM	4.4639
Lu12-3376806	12	3376806	T/G	0.2961		2016P4	mrMLM	4.4549
Lu13-13051094	13	13051094	G/C	-0.3236		2016P4	mrMLM	4.4279
Lu13-20463396	13	20463396	T/G	0.3009		2016P4	mrMLM	4.6127
Lu15-974597	15	974597	G/C	0.618		2016P4	mrMLM	5.3063
Lu1-4430955	1	4430955	C/T	-0.297		Mean	mrMLM	4.9653
Lu2-3462851	2	3462851	G/C	0.3507		Mean	mrMLM	3.7989
Lu2-21265477	2	21265477	C/T	-0.2786		Mean	mrMLM	4.7496
Lu3-18524714	3	18524714	A/G	0.3463		Mean	mrMLM	6.9658
Lu3-24413126	3	24413126	G/A	-0.445		Mean	mrMLM	4.939
Lu4-14213405	4	14213405	G/T	0.6117		Mean	mrMLM	5.7847
Lu5-2615705	5	2615705	C/T	-0.2975		Mean	mrMLM	6.1359
Lu8-15841943	8	15841943	G/T	0.4811		Mean	mrMLM	8.4101
Lu9-4333365	9	4333365	C/A	0.4341		Mean	mrMLM	3.1272
Lu9-15301547	9	15301547	A/G	0.5018		Mean	mrMLM	10.5683
Lu10-6096221	10	6096221	A/G	0.164		Mean	mrMLM	3.3699
Lu11-12073653	11	12073653	T/C	0.2212		Mean	mrMLM	3.226
Lu12-474480	12	474480	C/T	0.3196		Mean	mrMLM	10.0326
Lu12-2548498	12	2548498	T/C	-0.2521		Mean	mrMLM	3.7569
Lu12-6564789	12	6564789	C/T	-0.262		Mean	mrMLM	6.3545
Lu14-4807184	14	4807184	T/G	0.2657		Mean	mrMLM	3.987
Lu14-14691358	14	14691358	A/C	0.2535		Mean	mrMLM	5.1552
Lu14-17939559	14	17939559	G/A	0.2018		Mean	mrMLM	4.4012
Lu6-579350	6	579350	G/C	-0.6156		2012p4	FASTmrEMMA	4.9272
Lu6-2419373	6	2419373	A/G	-0.6916		2012p4	FASTmrEMMA	5.7441
Lu8-15745132	8	15745132	G/A	0.7508		2012p4	FASTmrEMMA	6.788
Lu9-2241252	9	2241252	C/T	-0.4902		2012p4	FASTmrEMMA	4.1114
Lu9-2560789	9	2560789	T/C	-0.5762		2012p4	FASTmrEMMA	5.0219
Lu9-17121993	9	17121993	T/C	0.5895		2012p4	FASTmrEMMA	3.6389
Lu9-17822959	9	17822959	C/G	0.649		2012p4	FASTmrEMMA	5.3523
Lu11-470312	11	470312	G/A	0.5037		2012p4	FASTmrEMMA	3.612
Lu12-44912	12	44912	G/A	0.4442		2012p4	FASTmrEMMA	3.9056
Lu12-1873664	12	1873664	T/C	-0.6696		2012p4	FASTmrEMMA	6.3285
Lu13-1247909	13	1247909	T/C	-0.4456		2012p4	FASTmrEMMA	3.3717
Lu13-14952991	13	14952991	A/T	0.5703		2012p4	FASTmrEMMA	3.3604
Lu13-17062842	13	17062842	G/A	0.6988		2012p4	FASTmrEMMA	7.9246
Lu14-3525674	14	3525674	A/C	-0.4558		2012p4	FASTmrEMMA	3.1323
Lu14-5544645	14	5544645	C/T	0.537		2012p4	FASTmrEMMA	4.4902
Lu15-13937880	15	13937880	T/C	-0.5239		2012p4	FASTmrEMMA	3.8013
Lu1-3547128	1	3547128	G/A	-0.6863		2013p4	FASTmrEMMA	5.6116
Lu4-7466349	4	7466349	G/A	0.9614		2013p4	FASTmrEMMA	3.535
Lu6-6011092	6	6011092	A/G	0.0001		2013p4	FASTmrEMMA	4.4709
Lu6-17054363	6	17054363	T/G	-0.6846		2013p4	FASTmrEMMA	4.6023
Lu7-16337164	7	16337164	T/A	-0.9085		2013p4	FASTmrEMMA	7.8403
Lu9-17682762	9	17682762	G/A	0.7959		2013p4	FASTmrEMMA	4.4734
Lu9-20353443	9	20353443	T/C	0.4988		2013p4	FASTmrEMMA	4.3193
Lu13-14238271	13	14238271	T/C	0.6754		2013p4	FASTmrEMMA	3.8661
Lu14-13320967	14	13320967	A/G	-0.6913		2013p4	FASTmrEMMA	4.6286
Lu1-6110039	1	6110039	G/C	-0.8306		2014p3	FASTmrEMMA	4.6074
Lu3-395862	3	395862	G/C	0.7661		2014p3	FASTmrEMMA	5.1526
Lu4-18602597	4	18602597	A/C	-0.7059		2014p3	FASTmrEMMA	4.5817
Lu8-15119358	8	15119358	C/T	0.6476		2014p3	FASTmrEMMA	3.0087
Lu8-22907525	8	22907525	A/T	-0.561		2014p3	FASTmrEMMA	3.0436
Lu9-1217851	9	1217851	G/A	-0.6037		2014p3	FASTmrEMMA	3.6735
Lu12-199421	12	199421	C/T	0.6069		2014p3	FASTmrEMMA	3.1752
Lu12-5819991	12	5819991	C/G	1.0958		2014p3	FASTmrEMMA	7.7154
Lu14-2330645	14	2330645	C/T	0.6851		2014p3	FASTmrEMMA	4.3073
Lu2-5746268	2	5746268	A/T	0.5864		2015p3	FASTmrEMMA	5.6812
Lu3-1814258	3	1814258	T/C	-0.3772		2015p3	FASTmrEMMA	3.7156
Lu3-4694214	3	4694214	C/T	-0.753		2015p3	FASTmrEMMA	6.0965
Lu4-10381960	4	10381960	T/G	-1.1299		2015p3	FASTmrEMMA	6.1115
Lu4-18721050	4	18721050	T/C	0.7757		2015p3	FASTmrEMMA	10.2732
Lu5-472205	5	472205	G/A	0.4226		2015p3	FASTmrEMMA	3.6759
Lu5-3575865	5	3575865	C/G	-0.694		2015p3	FASTmrEMMA	6.5229
Lu8-22063484	8	22063484	G/T	0.6077		2015p3	FASTmrEMMA	5.425
Lu9-376269	9	376269	C/T	0.5308		2015p3	FASTmrEMMA	5.4675
Lu12-1221434	12	1221434	C/T	0.7357		2015p3	FASTmrEMMA	4.7164
Lu12-6549664	12	6549664	C/G	-0.5217		2015p3	FASTmrEMMA	4.367
Lu13-646015	13	646015	A/G	0.7158		2015p3	FASTmrEMMA	8.2153
Lu13-3720348	13	3720348	C/G	0.8338		2015p3	FASTmrEMMA	6.3383
Lu1-3420323	1	3420323	G/A	-0.5825		2016P4	FASTmrEMMA	4.578
Lu1-6100723	1	6100723	G/A	0.6894		2016P4	FASTmrEMMA	6.3645
Lu8-15531687	8	15531687	C/T	-0.7488		2016P4	FASTmrEMMA	7.4197
Lu11-14512492	11	14512492	G/C	-0.5115		2016P4	FASTmrEMMA	5.4792
Lu13-13051094	13	13051094	G/C	-0.7576		2016P4	FASTmrEMMA	6.2952
Lu15-12866419	15	12866419	G/A	0.5976		2016P4	FASTmrEMMA	5.6265
Lu1-7729477	1	7729477	G/T	0.4801		Mean	FASTmrEMMA	5.2271
Lu1-10547654	1	10547654	T/C	0.6128		Mean	FASTmrEMMA	4.366
Lu2-22813337	2	22813337	G/T	0.4958		Mean	FASTmrEMMA	4.7905
Lu4-3763028	4	3763028	C/T	-0.3196		Mean	FASTmrEMMA	4.023
Lu8-17237505	8	17237505	G/T	-0.6878		Mean	FASTmrEMMA	5.331
Lu9-1067536	9	1067536	C/A	-0.575		Mean	FASTmrEMMA	4.5462
Lu9-5122396	9	5122396	G/C	0.485		Mean	FASTmrEMMA	4.399
Lu12-474480	12	474480	C/T	0.4669		Mean	FASTmrEMMA	4.8674
Lu12-16270114	12	16270114	A/C	-0.5084		Mean	FASTmrEMMA	4.9712
Lu13-17069940	13	17069940	T/A	0.3479		Mean	FASTmrEMMA	3.9895
Lu14-14691603	14	14691603	T/G	0.3579		Mean	FASTmrEMMA	4.3116
Lu1-8902619	1	8902619	G/A	0.2915		2012p4	ISIS EM-BLASSO	4.4309
Lu2-3805596	2	3805596	A/G	0.3073		2012p4	ISIS EM-BLASSO	3.4319
Lu4-14609452	4	14609452	C/T	0.4484		2012p4	ISIS EM-BLASSO	3.9539
Lu4-14738243	4	14738243	G/T	0.6017		2012p4	ISIS EM-BLASSO	13.576
Lu7-15181287	7	15181287	T/A	-0.1773		2012p4	ISIS EM-BLASSO	3.1587
Lu8-15841727	8	15841727	C/T	0.3828		2012p4	ISIS EM-BLASSO	3.8315
Lu11-470312	11	470312	G/A	0.3541		2012p4	ISIS EM-BLASSO	4.5199
Lu11-18273366	11	18273366	G/C	0.3376		2012p4	ISIS EM-BLASSO	4.2359
Lu13-14952991	13	14952991	A/T	0.2767		2012p4	ISIS EM-BLASSO	4.0884
Lu14-3363910	14	3363910	G/A	0.352		2012p4	ISIS EM-BLASSO	3.423
Lu14-4064478	14	4064478	C/T	-0.2969		2012p4	ISIS EM-BLASSO	3.5277
Lu14-5550807	14	5550807	G/T	0.2034		2012p4	ISIS EM-BLASSO	4.3068
Lu14-15015811	14	15015811	T/C	-0.4342		2012p4	ISIS EM-BLASSO	4.231
Lu1-6440820	1	6440820	G/A	0.264		2013p4	ISIS EM-BLASSO	7.1317
Lu1-11526797	1	11526797	A/T	0.4589		2013p4	ISIS EM-BLASSO	5.9086
Lu1-17921907	1	17921907	A/G	0.1922		2013p4	ISIS EM-BLASSO	4.2494
Lu2-3265741	2	3265741	T/C	-0.307		2013p4	ISIS EM-BLASSO	3.7664
Lu3-679808	3	679808	G/C	-0.2616		2013p4	ISIS EM-BLASSO	5.4549
Lu3-16725553	3	16725553	A/T	-0.3257		2013p4	ISIS EM-BLASSO	6.3515
Lu3-24927621	3	24927621	T/C	0.2275		2013p4	ISIS EM-BLASSO	4.655
Lu4-381392	4	381392	A/G	0.1939		2013p4	ISIS EM-BLASSO	4.4546
Lu4-13675099	4	13675099	G/T	0.2647		2013p4	ISIS EM-BLASSO	4.2983
Lu5-229918	5	229918	A/G	0.3186		2013p4	ISIS EM-BLASSO	4.0233
Lu6-9154179	6	9154179	G/A	0.4047		2013p4	ISIS EM-BLASSO	8.6697
Lu7-3368539	7	3368539	T/C	0.3613		2013p4	ISIS EM-BLASSO	8.2873
Lu8-14211289	8	14211289	C/T	0.4045		2013p4	ISIS EM-BLASSO	8.1733
Lu8-15991760	8	15991760	C/T	0.2918		2013p4	ISIS EM-BLASSO	6.6178
Lu8-22619596	8	22619596	A/C	0.2508		2013p4	ISIS EM-BLASSO	4.2361
Lu9-12304004	9	12304004	A/G	0.2969		2013p4	ISIS EM-BLASSO	6.1395
Lu10-582679	10	582679	G/A	0.2555		2013p4	ISIS EM-BLASSO	4.4363
Lu10-8622099	10	8622099	A/G	0.2616		2013p4	ISIS EM-BLASSO	5.5236
Lu11-2529230	11	2529230	G/A	0.2064		2013p4	ISIS EM-BLASSO	3.453
Lu13-2227366	13	2227366	C/T	-0.3913		2013p4	ISIS EM-BLASSO	4.5816
Lu14-7982582	14	7982582	G/A	0.2793		2013p4	ISIS EM-BLASSO	5.5011
Lu14-13320967	14	13320967	A/G	-0.2311		2013p4	ISIS EM-BLASSO	3.3246
Lu14-18799890	14	18799890	G/A	0.3673		2013p4	ISIS EM-BLASSO	5.1277
Lu15-7039560	15	7039560	G/A	0.2959		2013p4	ISIS EM-BLASSO	3.7673
Lu1-5150780	1	5150780	T/C	0.3096		2014p3	ISIS EM-BLASSO	4.188
Lu1-8187094	1	8187094	G/A	0.3508		2014p3	ISIS EM-BLASSO	3.4989
Lu4-17214936	4	17214936	G/T	-0.319		2014p3	ISIS EM-BLASSO	3.9609
Lu4-18718734	4	18718734	G/A	0.3278		2014p3	ISIS EM-BLASSO	3.6913
Lu6-3099718	6	3099718	G/A	0.3667		2014p3	ISIS EM-BLASSO	6.9279
Lu8-16904194	8	16904194	G/A	0.6212		2014p3	ISIS EM-BLASSO	5.2702
Lu8-22908138	8	22908138	C/T	-0.2968		2014p3	ISIS EM-BLASSO	3.7021
Lu10-17115895	10	17115895	T/C	0.3903		2014p3	ISIS EM-BLASSO	3.51
Lu11-2071637	11	2071637	T/C	0.4344		2014p3	ISIS EM-BLASSO	7.6032
Lu12-5552631	12	5552631	C/A	-0.387		2014p3	ISIS EM-BLASSO	3.9713
Lu12-5819991	12	5819991	C/G	0.4981		2014p3	ISIS EM-BLASSO	7.769
Lu12-6564789	12	6564789	C/T	-0.2293		2014p3	ISIS EM-BLASSO	3.4083
Lu13-1917918	13	1917918	T/C	0.5192		2014p3	ISIS EM-BLASSO	8.6742
Lu13-15732180	13	15732180	A/C	0.4573		2014p3	ISIS EM-BLASSO	6.2137
Lu14-1526396	14	1526396	A/G	0.2215		2014p3	ISIS EM-BLASSO	3.0831
Lu14-13655932	14	13655932	C/T	0.5012		2014p3	ISIS EM-BLASSO	7.2417
Lu1-4895147	1	4895147	C/G	0.3369		2015p3	ISIS EM-BLASSO	6.7918
Lu1-27517417	1	27517417	A/C	0.2454		2015p3	ISIS EM-BLASSO	4.795
Lu2-22838729	2	22838729	C/T	-0.2222		2015p3	ISIS EM-BLASSO	4.0923
Lu3-2666027	3	2666027	G/C	-0.2789		2015p3	ISIS EM-BLASSO	3.0136
Lu3-4694214	3	4694214	C/T	-0.3399		2015p3	ISIS EM-BLASSO	7.6455
Lu3-16923541	3	16923541	G/A	-0.147		2015p3	ISIS EM-BLASSO	3.4149
Lu3-25487781	3	25487781	T/C	0.2518		2015p3	ISIS EM-BLASSO	5.5479
Lu4-1803035	4	1803035	C/G	0.2033		2015p3	ISIS EM-BLASSO	4.7522
Lu4-13634913	4	13634913	G/A	-0.2283		2015p3	ISIS EM-BLASSO	3.5744
Lu4-18721050	4	18721050	T/C	0.1601		2015p3	ISIS EM-BLASSO	4.3313
Lu5-16087971	5	16087971	C/T	-0.2994		2015p3	ISIS EM-BLASSO	5.5313
Lu7-5462744	7	5462744	A/G	-0.4941		2015p3	ISIS EM-BLASSO	9.1818
Lu9-1436323	9	1436323	T/C	-0.2632		2015p3	ISIS EM-BLASSO	4.0772
Lu9-16348319	9	16348319	C/T	-0.2623		2015p3	ISIS EM-BLASSO	7.3145
Lu10-16154433	10	16154433	G/A	0.3374		2015p3	ISIS EM-BLASSO	3.7739
Lu12-1221434	12	1221434	C/T	0.4078		2015p3	ISIS EM-BLASSO	10.1244
Lu12-4139472	12	4139472	T/C	-0.2229		2015p3	ISIS EM-BLASSO	4.2852
Lu12-16358216	12	16358216	G/A	-0.4575		2015p3	ISIS EM-BLASSO	17.646
Lu13-12544460	13	12544460	C/T	0.2489		2015p3	ISIS EM-BLASSO	6.0274
Lu14-18895796	14	18895796	G/A	0.3557		2015p3	ISIS EM-BLASSO	9.8917
Lu15-988037	15	988037	T/G	0.3927		2015p3	ISIS EM-BLASSO	7.7404
Lu2-22814793	2	22814793	C/T	0.2337		2016P4	ISIS EM-BLASSO	3.6327
Lu4-3763028	4	3763028	C/T	-0.1628		2016P4	ISIS EM-BLASSO	3.334
Lu4-14538743	4	14538743	A/G	0.3677		2016P4	ISIS EM-BLASSO	7.8522
Lu5-10416948	5	10416948	A/G	0.2323		2016P4	ISIS EM-BLASSO	6.3682
Lu6-3145961	6	3145961	G/A	0.4373		2016P4	ISIS EM-BLASSO	6.3539
Lu8-6725206	8	6725206	A/G	-0.2405		2016P4	ISIS EM-BLASSO	5.1542
Lu8-17237505	8	17237505	G/T	-0.2688		2016P4	ISIS EM-BLASSO	5.1986
Lu8-20481934	8	20481934	C/G	0.4822		2016P4	ISIS EM-BLASSO	10.3082
Lu9-1127223	9	1127223	G/A	-0.2174		2016P4	ISIS EM-BLASSO	3.325
Lu11-18781253	11	18781253	C/T	0.1597		2016P4	ISIS EM-BLASSO	4.4313
Lu12-1221434	12	1221434	C/T	0.2534		2016P4	ISIS EM-BLASSO	5.1502
Lu13-14231910	13	14231910	A/G	-0.224		2016P4	ISIS EM-BLASSO	5.145
Lu14-3666172	14	3666172	C/T	-0.227		2016P4	ISIS EM-BLASSO	3.96
Lu14-16645549	14	16645549	C/T	0.3384		2016P4	ISIS EM-BLASSO	5.0057
Lu14-18380869	14	18380869	T/C	-0.2683		2016P4	ISIS EM-BLASSO	6.172
Lu15-12915204	15	12915204	G/A	-0.248		2016P4	ISIS EM-BLASSO	4.9394
Lu15-13809415	15	13809415	G/A	-0.3675		2016P4	ISIS EM-BLASSO	7.9849
Lu1-7090793	1	7090793	A/T	0.2038		Mean	ISIS EM-BLASSO	3.4329
Lu1-15921509	1	15921509	G/A	0.2015		Mean	ISIS EM-BLASSO	4.534
Lu2-3462851	2	3462851	G/C	0.238		Mean	ISIS EM-BLASSO	3.4857
Lu4-13306407	4	13306407	A/G	-0.2583		Mean	ISIS EM-BLASSO	4.3374
Lu4-14738243	4	14738243	G/T	0.2466		Mean	ISIS EM-BLASSO	4.5022
Lu4-14810782	4	14810782	C/A	0.1621		Mean	ISIS EM-BLASSO	3.3036
Lu4-17204590	4	17204590	C/A	-0.2057		Mean	ISIS EM-BLASSO	4.7617
Lu5-10304784	5	10304784	C/T	0.1377		Mean	ISIS EM-BLASSO	3.8617
Lu5-10360045	5	10360045	C/G	0.1503		Mean	ISIS EM-BLASSO	3.3728
Lu7-4237735	7	4237735	G/T	0.1823		Mean	ISIS EM-BLASSO	3.1444
Lu7-6989592	7	6989592	T/C	0.2149		Mean	ISIS EM-BLASSO	3.8699
Lu7-17459000	7	17459000	T/C	-0.1714		Mean	ISIS EM-BLASSO	3.4094
Lu8-14317356	8	14317356	A/T	0.2967		Mean	ISIS EM-BLASSO	7.1563
Lu8-15991760	8	15991760	C/T	0.1993		Mean	ISIS EM-BLASSO	5.3024
Lu8-20031761	8	20031761	A/G	0.1893		Mean	ISIS EM-BLASSO	3.5241
Lu9-16348319	9	16348319	C/T	-0.2345		Mean	ISIS EM-BLASSO	8.2493
Lu11-4144862	11	4144862	T/C	0.3946		Mean	ISIS EM-BLASSO	4.6583
Lu15-988037	15	988037	T/G	0.2024		Mean	ISIS EM-BLASSO	4.0186
Lu15-12937741	15	12937741	T/A	0.1685		Mean	ISIS EM-BLASSO	4.2198
Lu15-14237747	15	14237747	C/T	0.2939		Mean	ISIS EM-BLASSO	3.9663
Lu4-595219	4	595219	A/G	-0.4408		2012p4	pLARmEB	8.6655
Lu4-14738243	4	14738243	G/T	0.2889		2012p4	pLARmEB	3.7533
Lu4-15215704	4	15215704	C/T	0.3117		2012p4	pLARmEB	4.2215
Lu5-15424935	5	15424935	C/T	0.315		2012p4	pLARmEB	3.5835
Lu5-16798097	5	16798097	C/T	0.2137		2012p4	pLARmEB	4.0526
Lu6-2419373	6	2419373	A/G	-0.3966		2012p4	pLARmEB	8.173
Lu8-19992045	8	19992045	A/G	0.2146		2012p4	pLARmEB	3.8296
Lu9-2560789	9	2560789	T/C	-0.3966		2012p4	pLARmEB	10.3576
Lu9-5202955	9	5202955	G/A	0.2163		2012p4	pLARmEB	3.0656
Lu9-17822959	9	17822959	C/G	0.2656		2012p4	pLARmEB	4.8161
Lu12-44912	12	44912	G/A	0.3159		2012p4	pLARmEB	7.1897
Lu12-1874446	12	1874446	G/A	-0.3397		2012p4	pLARmEB	7.1186
Lu12-2719326	12	2719326	C/T	0.4592		2012p4	pLARmEB	6.4558
Lu13-1247909	13	1247909	T/C	-0.3206		2012p4	pLARmEB	5.7011
Lu13-17063922	13	17063922	T/A	0.2468		2012p4	pLARmEB	3.9275
Lu14-3525674	14	3525674	A/C	-0.2985		2012p4	pLARmEB	5.5764
Lu15-13937880	15	13937880	T/C	-0.2536		2012p4	pLARmEB	5.0585
Lu1-19267619	1	19267619	A/C	0.2641		2013p4	pLARmEB	3.5038
Lu2-1942258	2	1942258	G/A	0.3046		2013p4	pLARmEB	6.4132
Lu2-3265741	2	3265741	T/C	-0.3221		2013p4	pLARmEB	3.5533
Lu2-3828713	2	3828713	A/G	0.2229		2013p4	pLARmEB	3.9332
Lu2-5083951	2	5083951	C/A	-0.3234		2013p4	pLARmEB	7.6386
Lu3-4341892	3	4341892	A/G	0.2975		2013p4	pLARmEB	5.9454
Lu4-17442202	4	17442202	A/T	0.2103		2013p4	pLARmEB	3.3509
Lu6-6004425	6	6004425	C/T	0.2229		2013p4	pLARmEB	4.8491
Lu6-17054363	6	17054363	T/G	-0.2876		2013p4	pLARmEB	6.3702
Lu7-4038658	7	4038658	T/G	0.3676		2013p4	pLARmEB	8.0645
Lu7-16337164	7	16337164	T/A	-0.2815		2013p4	pLARmEB	5.2735
Lu8-3225025	8	3225025	T/A	0.2572		2013p4	pLARmEB	3.8106
Lu8-14211289	8	14211289	C/T	0.5342		2013p4	pLARmEB	15.1834
Lu9-12304031	9	12304031	A/G	0.3398		2013p4	pLARmEB	7.1549
Lu9-17912104	9	17912104	C/T	0.3024		2013p4	pLARmEB	5.8923
Lu10-1804664	10	1804664	A/T	0.4789		2013p4	pLARmEB	5.5625
Lu10-15243367	10	15243367	A/G	-0.4017		2013p4	pLARmEB	5.9183
Lu10-16054459	10	16054459	G/A	-0.2657		2013p4	pLARmEB	3.5279
Lu13-7831093	13	7831093	G/A	0.2293		2013p4	pLARmEB	4.8015
Lu13-14282050	13	14282050	C/T	0.364		2013p4	pLARmEB	7.1921
Lu14-1139970	14	1139970	C/T	-0.2146		2013p4	pLARmEB	3.7425
Lu14-4551657	14	4551657	T/C	0.4907		2013p4	pLARmEB	6.24
Lu14-4863772	14	4863772	A/G	0.2682		2013p4	pLARmEB	4.2127
Lu14-15197307	14	15197307	T/A	0.2044		2013p4	pLARmEB	4.0471
Lu15-1004292	15	1004292	G/A	0.3285		2013p4	pLARmEB	7.2178
Lu15-8801573	15	8801573	C/T	0.3899		2013p4	pLARmEB	5.2592
Lu1-18741837	1	18741837	C/T	0.2622		2014p3	pLARmEB	4.1269
Lu2-19365052	2	19365052	G/A	0.3419		2014p3	pLARmEB	6.2356
Lu2-23305628	2	23305628	C/T	0.3951		2014p3	pLARmEB	4.317
Lu2-23730537	2	23730537	T/A	-0.4747		2014p3	pLARmEB	5.0573
Lu3-22688547	3	22688547	C/G	0.3155		2014p3	pLARmEB	3.2992
Lu3-24541551	3	24541551	T/C	0.3218		2014p3	pLARmEB	5.2455
Lu4-14968364	4	14968364	C/G	-0.2414		2014p3	pLARmEB	4.796
Lu5-3667639	5	3667639	C/T	-0.1587		2014p3	pLARmEB	3.611
Lu7-10626097	7	10626097	A/T	0.285		2014p3	pLARmEB	4.1868
Lu8-17237505	8	17237505	G/T	-0.5794		2014p3	pLARmEB	8.5246
Lu8-23255297	8	23255297	T/A	0.3502		2014p3	pLARmEB	5.6717
Lu9-1220051	9	1220051	T/A	-0.2261		2014p3	pLARmEB	4.7098
Lu9-6397784	9	6397784	C/T	0.4823		2014p3	pLARmEB	9.0119
Lu9-15527375	9	15527375	G/A	0.4777		2014p3	pLARmEB	6.762
Lu9-17121993	9	17121993	T/C	0.2661		2014p3	pLARmEB	4.262
Lu10-2966373	10	2966373	T/A	0.6168		2014p3	pLARmEB	6.7102
Lu11-4055637	11	4055637	G/C	0.2434		2014p3	pLARmEB	5.6019
Lu12-207925	12	207925	C/T	-0.3178		2014p3	pLARmEB	3.8268
Lu12-317428	12	317428	G/T	0.4676		2014p3	pLARmEB	5.9305
Lu12-6564789	12	6564789	C/T	-0.2756		2014p3	pLARmEB	4.8339
Lu12-15510314	12	15510314	A/T	0.4227		2014p3	pLARmEB	6.7205
Lu13-2219845	13	2219845	G/A	0.3288		2014p3	pLARmEB	6.5457
Lu13-4081141	13	4081141	C/T	0.2057		2014p3	pLARmEB	3.849
Lu13-12446181	13	12446181	C/T	-0.3618		2014p3	pLARmEB	5.6566
Lu13-15389417	13	15389417	A/C	-0.2426		2014p3	pLARmEB	4.9139
Lu13-15610835	13	15610835	A/G	0.2558		2014p3	pLARmEB	3.6918
Lu15-11784533	15	11784533	A/G	0.375		2014p3	pLARmEB	8.0057
Lu1-15921973	1	15921973	C/T	0.2191		2015p3	pLARmEB	3.6571
Lu2-5746268	2	5746268	A/T	0.275		2015p3	pLARmEB	4.3273
Lu2-22838729	2	22838729	C/T	-0.2386		2015p3	pLARmEB	4.1473
Lu2-23393854	2	23393854	G/T	0.1862		2015p3	pLARmEB	3.4215
Lu3-4694633	3	4694633	C/T	0.3384		2015p3	pLARmEB	5.5539
Lu3-18957826	3	18957826	A/G	0.241		2015p3	pLARmEB	4.252
Lu3-22688547	3	22688547	C/G	0.3849		2015p3	pLARmEB	6.2269
Lu4-10381960	4	10381960	T/G	-0.5523		2015p3	pLARmEB	7.3904
Lu4-18721050	4	18721050	T/C	0.2242		2015p3	pLARmEB	4.5549
Lu5-469937	5	469937	G/C	0.377		2015p3	pLARmEB	5.7435
Lu7-1868261	7	1868261	T/A	0.2529		2015p3	pLARmEB	4.2682
Lu8-15574512	8	15574512	A/G	-0.2384		2015p3	pLARmEB	5.3994
Lu9-16348319	9	16348319	C/T	-0.1474		2015p3	pLARmEB	3.137
Lu10-15535770	10	15535770	C/T	0.2579		2015p3	pLARmEB	4.4604
Lu11-16351076	11	16351076	A/G	-0.2041		2015p3	pLARmEB	3.356
Lu12-1196812	12	1196812	C/T	0.4279		2015p3	pLARmEB	6.2252
Lu12-16358216	12	16358216	G/A	-0.2631		2015p3	pLARmEB	5.2383
Lu13-15260052	13	15260052	A/T	-0.147		2015p3	pLARmEB	3.2613
Lu14-1489925	14	1489925	G/A	0.3706		2015p3	pLARmEB	5.7723
Lu14-18895796	14	18895796	G/A	0.2808		2015p3	pLARmEB	5.4042
Lu1-6100723	1	6100723	G/A	0.1857		2016P4	pLARmEB	3.1654
Lu1-28931153	1	28931153	A/G	0.2371		2016P4	pLARmEB	3.7278
Lu2-24868766	2	24868766	T/G	0.2287		2016P4	pLARmEB	3.3226
Lu3-4703786	3	4703786	C/T	-0.2471		2016P4	pLARmEB	4.6938
Lu4-14538743	4	14538743	A/G	0.3905		2016P4	pLARmEB	7.3201
Lu4-14841649	4	14841649	C/T	-0.2749		2016P4	pLARmEB	5.4934
Lu5-10415458	5	10415458	C/T	0.2686		2016P4	pLARmEB	7.4853
Lu8-6725206	8	6725206	A/G	-0.2302		2016P4	pLARmEB	4.9273
Lu8-16084810	8	16084810	A/T	0.3033		2016P4	pLARmEB	3.3995
Lu9-1127223	9	1127223	G/A	-0.1748		2016P4	pLARmEB	3.1082
Lu9-2126112	9	2126112	A/G	-0.2443		2016P4	pLARmEB	4.5731
Lu11-15026949	11	15026949	C/G	0.1561		2016P4	pLARmEB	3.5987
Lu12-6564789	12	6564789	C/T	-0.235		2016P4	pLARmEB	5.5804
Lu13-6262214	13	6262214	T/G	0.2993		2016P4	pLARmEB	5.1566
Lu13-14231910	13	14231910	A/G	-0.2618		2016P4	pLARmEB	5.6384
Lu13-18085970	13	18085970	A/C	-0.2203		2016P4	pLARmEB	4.4276
Lu14-16645549	14	16645549	C/T	0.3502		2016P4	pLARmEB	4.8306
Lu14-18380869	14	18380869	T/C	-0.2431		2016P4	pLARmEB	5.4681
Lu15-1002029	15	1002029	T/C	0.2557		2016P4	pLARmEB	4.6262
Lu15-13809415	15	13809415	G/A	-0.3481		2016P4	pLARmEB	6.7368
Lu1-4430955	1	4430955	C/T	-0.1843		Mean	pLARmEB	4.1519
Lu2-1672315	2	1672315	C/T	0.2105		Mean	pLARmEB	5.987
Lu3-4696073	3	4696073	C/T	-0.1356		Mean	pLARmEB	4.2666
Lu3-6891789	3	6891789	G/T	0.2691		Mean	pLARmEB	4.531
Lu3-18524714	3	18524714	A/G	0.1261		Mean	pLARmEB	3.8531
Lu4-14738243	4	14738243	G/T	0.3108		Mean	pLARmEB	8.6834
Lu4-17214936	4	17214936	G/T	-0.2002		Mean	pLARmEB	5.0292
Lu5-1102545	5	1102545	C/A	0.1774		Mean	pLARmEB	4.7311
Lu5-1554121	5	1554121	T/A	-0.1551		Mean	pLARmEB	3.2747
Lu7-4239499	7	4239499	C/A	0.1595		Mean	pLARmEB	3.6647
Lu7-4919436	7	4919436	C/T	0.1813		Mean	pLARmEB	4.3648
Lu8-15841943	8	15841943	G/T	0.318		Mean	pLARmEB	7.4619
Lu8-20031761	8	20031761	A/G	0.2315		Mean	pLARmEB	6.2667
Lu9-1067536	9	1067536	C/A	-0.2788		Mean	pLARmEB	6.751
Lu9-16348319	9	16348319	C/T	-0.2201		Mean	pLARmEB	8.4755
Lu10-16153439	10	16153439	C/T	0.2576		Mean	pLARmEB	3.8226
Lu11-4144862	11	4144862	T/C	0.3655		Mean	pLARmEB	4.3127
Lu11-5121207	11	5121207	C/T	0.1577		Mean	pLARmEB	4.9445
Lu11-17692930	11	17692930	G/A	0.1915		Mean	pLARmEB	5.1803
Lu13-15099269	13	15099269	G/T	0.23		Mean	pLARmEB	6.131
Lu14-4817004	14	4817004	G/A	0.2171		Mean	pLARmEB	5.1142
Lu15-14237747	15	14237747	C/T	0.2805		Mean	pLARmEB	4.541
Lu1-8902619	1	8902619	G/A	0.2397		2012p4	pKWmEB	3.365
Lu4-14738243	4	14738243	G/T	0.3301		2012p4	pKWmEB	4.1206
Lu5-4604607	5	4604607	A/G	0.247		2012p4	pKWmEB	4.4551
Lu5-10223859	5	10223859	C/T	0.4433		2012p4	pKWmEB	5.7079
Lu9-2560789	9	2560789	T/C	-0.2359		2012p4	pKWmEB	5.2443
Lu9-5202955	9	5202955	G/A	0.324		2012p4	pKWmEB	3.6687
Lu9-17121993	9	17121993	T/C	0.2677		2012p4	pKWmEB	4.5161
Lu9-17822959	9	17822959	C/G	0.4033		2012p4	pKWmEB	10.4714
Lu11-5977860	11	5977860	A/T	0.303		2012p4	pKWmEB	6.0525
Lu12-2719326	12	2719326	C/T	0.3673		2012p4	pKWmEB	6.2528
Lu13-3007108	13	3007108	C/T	0.1908		2012p4	pKWmEB	3.143
Lu13-17062842	13	17062842	G/A	0.2644		2012p4	pKWmEB	4.2598
Lu14-4064478	14	4064478	C/T	-0.2629		2012p4	pKWmEB	3.5514
Lu14-5550807	14	5550807	G/T	0.1821		2012p4	pKWmEB	3.1341
Lu15-13937880	15	13937880	T/C	-0.2622		2012p4	pKWmEB	6.214
Lu1-4874616	1	4874616	A/G	0.1709		2013p4	pKWmEB	3.8973
Lu1-6440820	1	6440820	G/A	0.2109		2013p4	pKWmEB	3.4815
Lu1-10846422	1	10846422	A/G	-0.3708		2013p4	pKWmEB	6.6961
Lu2-6902542	2	6902542	G/A	-0.3066		2013p4	pKWmEB	4.7541
Lu3-4341892	3	4341892	A/G	0.2648		2013p4	pKWmEB	4.3591
Lu3-11111776	3	11111776	T/G	0.3988		2013p4	pKWmEB	6.5754
Lu3-16725553	3	16725553	A/T	-0.3213		2013p4	pKWmEB	5.4007
Lu5-1650980	5	1650980	C/G	0.2924		2013p4	pKWmEB	3.4979
Lu6-9154179	6	9154179	G/A	0.4074		2013p4	pKWmEB	8.4779
Lu7-16337164	7	16337164	T/A	-0.2624		2013p4	pKWmEB	5.7566
Lu8-7639020	8	7639020	C/A	0.4468		2013p4	pKWmEB	4.1076
Lu8-14211289	8	14211289	C/T	0.2724		2013p4	pKWmEB	4.7871
Lu8-22619596	8	22619596	A/C	0.3728		2013p4	pKWmEB	8.1671
Lu9-2528615	9	2528615	T/G	0.3051		2013p4	pKWmEB	4.5792
Lu9-19456547	9	19456547	T/G	0.3443		2013p4	pKWmEB	3.7256
Lu10-8622099	10	8622099	A/G	0.2186		2013p4	pKWmEB	3.695
Lu13-2227366	13	2227366	C/T	-0.3517		2013p4	pKWmEB	4.5738
Lu13-14282050	13	14282050	C/T	0.2122		2013p4	pKWmEB	3.0434
Lu14-4551657	14	4551657	T/C	0.4615		2013p4	pKWmEB	5.1032
Lu14-13320967	14	13320967	A/G	-0.3371		2013p4	pKWmEB	5.2756
Lu14-15685576	14	15685576	C/G	0.3111		2013p4	pKWmEB	5.1775
Lu15-12865534	15	12865534	A/G	0.2703		2013p4	pKWmEB	4.7556
Lu1-6110039	1	6110039	G/C	-0.2909		2014p3	pKWmEB	4.2538
Lu1-6245350	1	6245350	T/A	-0.5331		2014p3	pKWmEB	4.6696
Lu1-27387684	1	27387684	G/T	0.4283		2014p3	pKWmEB	6.2505
Lu3-22688547	3	22688547	C/G	0.4922		2014p3	pKWmEB	5.3684
Lu4-14609236	4	14609236	C/T	0.2576		2014p3	pKWmEB	3.0714
Lu4-18718734	4	18718734	G/A	0.3074		2014p3	pKWmEB	3.5091
Lu8-17270785	8	17270785	C/G	0.4753		2014p3	pKWmEB	4.8808
Lu8-22908138	8	22908138	C/T	-0.3307		2014p3	pKWmEB	3.9775
Lu12-207925	12	207925	C/T	-0.3145		2014p3	pKWmEB	3.5985
Lu12-5819991	12	5819991	C/G	0.2844		2014p3	pKWmEB	4.6378
Lu12-6564789	12	6564789	C/T	-0.3098		2014p3	pKWmEB	4.6434
Lu13-15732180	13	15732180	A/C	0.5005		2014p3	pKWmEB	7.0058
Lu14-13655932	14	13655932	C/T	0.3197		2014p3	pKWmEB	3.7315
Lu2-5647378	2	5647378	G/C	-0.2855		2015p3	pKWmEB	4.9127
Lu3-2666027	3	2666027	G/C	-0.2244		2015p3	pKWmEB	3.6238
Lu3-4694214	3	4694214	C/T	-0.2799		2015p3	pKWmEB	4.2228
Lu3-22688547	3	22688547	C/G	0.3226		2015p3	pKWmEB	4.2084
Lu4-14877833	4	14877833	A/C	0.2336		2015p3	pKWmEB	3.2485
Lu4-18721050	4	18721050	T/C	0.1786		2015p3	pKWmEB	3.1763
Lu5-469937	5	469937	G/C	0.4071		2015p3	pKWmEB	6.1984
Lu6-3238858	6	3238858	T/C	-0.2521		2015p3	pKWmEB	4.9808
Lu8-18975984	8	18975984	C/T	0.2068		2015p3	pKWmEB	3.1607
Lu8-22635165	8	22635165	C/T	-0.2532		2015p3	pKWmEB	4.1505
Lu10-13782653	10	13782653	C/T	0.2219		2015p3	pKWmEB	3.8262
Lu10-16154433	10	16154433	G/A	0.4078		2015p3	pKWmEB	4.189
Lu12-1196812	12	1196812	C/T	0.4645		2015p3	pKWmEB	6.7174
Lu12-16358216	12	16358216	G/A	-0.2939		2015p3	pKWmEB	5.8738
Lu13-12544460	13	12544460	C/T	0.2595		2015p3	pKWmEB	5.1194
Lu14-18895796	14	18895796	G/A	0.1925		2015p3	pKWmEB	3.0266
Lu15-988037	15	988037	T/G	0.3361		2015p3	pKWmEB	5.8485
Lu1-1340221	1	1340221	C/T	0.2999		2016P4	pKWmEB	5.5256
Lu1-3420323	1	3420323	G/A	-0.1631		2016P4	pKWmEB	3.8243
Lu1-28931153	1	28931153	A/G	0.2275		2016P4	pKWmEB	5.4193
Lu2-3462851	2	3462851	G/C	0.2816		2016P4	pKWmEB	3.4551
Lu3-17193667	3	17193667	C/A	-0.2275		2016P4	pKWmEB	3.5705
Lu3-17811882	3	17811882	C/T	0.2145		2016P4	pKWmEB	4.503
Lu4-899685	4	899685	G/A	0.2415		2016P4	pKWmEB	4.6142
Lu4-14841649	4	14841649	C/T	-0.2054		2016P4	pKWmEB	3.2751
Lu4-15302119	4	15302119	C/T	-0.2425		2016P4	pKWmEB	4.3379
Lu7-8230932	7	8230932	A/G	0.2524		2016P4	pKWmEB	3.3191
Lu11-3621325	11	3621325	A/C	0.1601		2016P4	pKWmEB	4.2949
Lu11-4144862	11	4144862	T/C	0.545		2016P4	pKWmEB	7.0817
Lu13-13051094	13	13051094	G/C	-0.2386		2016P4	pKWmEB	5.2033
Lu13-15695019	13	15695019	C/A	0.2394		2016P4	pKWmEB	3.9626
Lu14-3666172	14	3666172	C/T	-0.2734		2016P4	pKWmEB	5.1431
Lu14-5887299	14	5887299	A/G	0.2464		2016P4	pKWmEB	4.5679
Lu14-13746390	14	13746390	C/T	0.1842		2016P4	pKWmEB	3.7719
Lu14-18380869	14	18380869	T/C	-0.1584		2016P4	pKWmEB	4.1925
Lu15-1002029	15	1002029	T/C	0.2543		2016P4	pKWmEB	6.1078
Lu15-13809415	15	13809415	G/A	-0.3582		2016P4	pKWmEB	7.6145
Lu1-10846422	1	10846422	A/G	-0.1699		Mean	pKWmEB	3.1874
Lu2-3803078	2	3803078	C/T	0.1448		Mean	pKWmEB	3.527
Lu4-14758081	4	14758081	G/T	-0.2129		Mean	pKWmEB	3.8783
Lu5-2300132	5	2300132	G/A	0.2612		Mean	pKWmEB	6.9462
Lu7-4919436	7	4919436	C/T	0.1714		Mean	pKWmEB	3.2549
Lu7-6989592	7	6989592	T/C	0.2117		Mean	pKWmEB	3.6565
Lu7-17459000	7	17459000	T/C	-0.3034		Mean	pKWmEB	7.4251
Lu8-3209265	8	3209265	G/A	0.1604		Mean	pKWmEB	3.9228
Lu8-4121350	8	4121350	C/G	0.218		Mean	pKWmEB	5.2009
Lu8-14317356	8	14317356	A/T	0.2749		Mean	pKWmEB	6.7377
Lu9-5202955	9	5202955	G/A	0.1875		Mean	pKWmEB	3.3209
Lu9-16348319	9	16348319	C/T	-0.2499		Mean	pKWmEB	9.5951
Lu9-20619066	9	20619066	G/A	0.2117		Mean	pKWmEB	6.8613
Lu10-8700793	10	8700793	A/G	0.1662		Mean	pKWmEB	4.3482
Lu11-4144862	11	4144862	T/C	0.5604		Mean	pKWmEB	10.9506
Lu12-15759574	12	15759574	C/G	0.1436		Mean	pKWmEB	3.0627
Lu15-988037	15	988037	T/G	0.1692		Mean	pKWmEB	3.6044
Lu15-3581793	15	3581793	G/A	0.2341		Mean	pKWmEB	4.3462
Lu1-6326827	1	6326827	C/A	-0.2483		2012p4	FASTmrMLM	3.5607
Lu2-2717111	2	2717111	A/G	0.1732		2012p4	FASTmrMLM	3.6681
Lu4-11315751	4	11315751	G/C	0.3376		2012p4	FASTmrMLM	6.3426
Lu4-12227127	4	12227127	C/T	0.3099		2012p4	FASTmrMLM	4.2005
Lu4-13306407	4	13306407	A/G	-0.3535		2012p4	FASTmrMLM	5.2739
Lu4-14437917	4	14437917	T/C	-0.3114		2012p4	FASTmrMLM	5.5983
Lu6-579350	6	579350	G/C	-0.2557		2012p4	FASTmrMLM	3.883
Lu6-625467	6	625467	T/A	-0.2427		2012p4	FASTmrMLM	4.1364
Lu6-16666313	6	16666313	A/T	0.2457		2012p4	FASTmrMLM	4.2524
Lu8-19992045	8	19992045	A/G	0.2566		2012p4	FASTmrMLM	5.8618
Lu9-2241252	9	2241252	C/T	-0.1962		2012p4	FASTmrMLM	3.726
Lu9-2560789	9	2560789	T/C	-0.2431		2012p4	FASTmrMLM	5.1495
Lu11-470312	11	470312	G/A	0.3106		2012p4	FASTmrMLM	4.7707
Lu11-4063301	11	4063301	G/A	0.184		2012p4	FASTmrMLM	3.7076
Lu12-44912	12	44912	G/A	0.2281		2012p4	FASTmrMLM	4.6955
Lu12-1874446	12	1874446	G/A	-0.2714		2012p4	FASTmrMLM	6.4626
Lu12-2735276	12	2735276	T/C	0.2665		2012p4	FASTmrMLM	5.5082
Lu12-15783557	12	15783557	C/T	0.1909		2012p4	FASTmrMLM	3.7234
Lu13-1247909	13	1247909	T/C	-0.2384		2012p4	FASTmrMLM	4.4308
Lu13-13255897	13	13255897	G/T	-0.254		2012p4	FASTmrMLM	4.086
Lu13-15435085	13	15435085	C/G	0.4033		2012p4	FASTmrMLM	6.886
Lu13-16092588	13	16092588	G/T	0.3329		2012p4	FASTmrMLM	4.637
Lu13-17062842	13	17062842	G/A	0.2672		2012p4	FASTmrMLM	6.7184
Lu14-3525674	14	3525674	A/C	-0.2798		2012p4	FASTmrMLM	5.7719
Lu14-5766261	14	5766261	A/G	0.2447		2012p4	FASTmrMLM	4.9495
Lu2-3265741	2	3265741	T/C	-0.4657		2013p4	FASTmrMLM	6.2797
Lu3-4341892	3	4341892	A/G	0.4435		2013p4	FASTmrMLM	9.7429
Lu4-18624680	4	18624680	G/A	0.2624		2013p4	FASTmrMLM	3.7003
Lu5-229918	5	229918	A/G	0.2759		2013p4	FASTmrMLM	4.7979
Lu6-9154179	6	9154179	G/A	0.359		2013p4	FASTmrMLM	5.3746
Lu6-17054363	6	17054363	T/G	-0.2762		2013p4	FASTmrMLM	4.5182
Lu8-2669854	8	2669854	C/T	0.4405		2013p4	FASTmrMLM	3.7393
Lu8-3209265	8	3209265	G/A	0.2771		2013p4	FASTmrMLM	3.783
Lu8-14211289	8	14211289	C/T	0.3695		2013p4	FASTmrMLM	6.9864
Lu9-4104973	9	4104973	C/T	-0.2284		2013p4	FASTmrMLM	3.6072
Lu10-1078111	10	1078111	A/G	-0.4243		2013p4	FASTmrMLM	6.225
Lu10-8622099	10	8622099	A/G	0.2314		2013p4	FASTmrMLM	3.2347
Lu10-15243367	10	15243367	A/G	-0.2956		2013p4	FASTmrMLM	3.1393
Lu13-14282050	13	14282050	C/T	0.2484		2013p4	FASTmrMLM	3.2047
Lu13-14352417	13	14352417	A/G	0.2259		2013p4	FASTmrMLM	3.9978
Lu14-2644827	14	2644827	G/A	0.2381		2013p4	FASTmrMLM	5.5699
Lu14-4551657	14	4551657	T/C	0.5637		2013p4	FASTmrMLM	5.764
Lu14-15685576	14	15685576	C/G	0.2754		2013p4	FASTmrMLM	3.7094
Lu1-6105351	1	6105351	A/T	-0.301		2014p3	FASTmrMLM	4.1029
Lu1-6251019	1	6251019	A/G	-0.4252		2014p3	FASTmrMLM	5.0779
Lu1-18741837	1	18741837	C/T	0.3319		2014p3	FASTmrMLM	5.2792
Lu2-19365052	2	19365052	G/A	0.3355		2014p3	FASTmrMLM	5.3263
Lu2-23305628	2	23305628	C/T	0.3545		2014p3	FASTmrMLM	4.2779
Lu2-23730537	2	23730537	T/A	-0.3605		2014p3	FASTmrMLM	3.3149
Lu3-19480519	3	19480519	A/C	0.3462		2014p3	FASTmrMLM	3.9393
Lu3-22688547	3	22688547	C/G	0.4883		2014p3	FASTmrMLM	6.9643
Lu4-1947788	4	1947788	G/A	0.1677		2014p3	FASTmrMLM	3.5669
Lu4-14758081	4	14758081	G/T	-0.3112		2014p3	FASTmrMLM	3.5051
Lu7-11375917	7	11375917	C/G	-0.4011		2014p3	FASTmrMLM	4.9376
Lu8-17270785	8	17270785	C/G	0.476		2014p3	FASTmrMLM	7.1636
Lu9-986030	9	986030	A/C	0.2131		2014p3	FASTmrMLM	3.8909
Lu9-1220051	9	1220051	T/A	-0.2368		2014p3	FASTmrMLM	5.3217
Lu9-15527375	9	15527375	G/A	0.3482		2014p3	FASTmrMLM	4.0712
Lu10-2966373	10	2966373	T/A	0.491		2014p3	FASTmrMLM	3.7622
Lu10-5804104	10	5804104	C/A	-0.3057		2014p3	FASTmrMLM	5.2233
Lu11-4055637	11	4055637	G/C	0.1886		2014p3	FASTmrMLM	3.7473
Lu12-207925	12	207925	C/T	-0.2976		2014p3	FASTmrMLM	3.267
Lu12-4327283	12	4327283	G/A	-0.4072		2014p3	FASTmrMLM	4.92
Lu12-5819991	12	5819991	C/G	0.2752		2014p3	FASTmrMLM	3.6992
Lu12-6564789	12	6564789	C/T	-0.334		2014p3	FASTmrMLM	5.617
Lu13-4081141	13	4081141	C/T	0.604		2014p3	FASTmrMLM	9.8998
Lu13-15389417	13	15389417	A/C	-0.2471		2014p3	FASTmrMLM	3.8821
Lu13-15732180	13	15732180	A/C	0.6198		2014p3	FASTmrMLM	15.8384
Lu15-2638471	15	2638471	C/T	-0.2383		2014p3	FASTmrMLM	4.2323
Lu1-23870434	1	23870434	A/G	-0.4365		2015p3	FASTmrMLM	4.1583
Lu2-5746268	2	5746268	A/T	0.3589		2015p3	FASTmrMLM	7.4223
Lu2-6167897	2	6167897	T/C	-0.2326		2015p3	FASTmrMLM	4.8423
Lu3-4694633	3	4694633	C/T	0.4257		2015p3	FASTmrMLM	9.2117
Lu3-22688547	3	22688547	C/G	0.5489		2015p3	FASTmrMLM	12.0097
Lu4-10381960	4	10381960	T/G	-0.4304		2015p3	FASTmrMLM	4.2928
Lu4-18721050	4	18721050	T/C	0.264		2015p3	FASTmrMLM	6.7403
Lu5-469937	5	469937	G/C	0.4787		2015p3	FASTmrMLM	10.4803
Lu5-16087971	5	16087971	C/T	-0.2485		2015p3	FASTmrMLM	4.6901
Lu7-6878036	7	6878036	C/A	0.2964		2015p3	FASTmrMLM	7.0168
Lu8-8699101	8	8699101	T/C	0.3113		2015p3	FASTmrMLM	6.9077
Lu8-14331564	8	14331564	T/C	0.4105		2015p3	FASTmrMLM	7.3682
Lu8-15574512	8	15574512	A/G	-0.2607		2015p3	FASTmrMLM	6.2923
Lu10-16153439	10	16153439	C/T	0.4765		2015p3	FASTmrMLM	6.3048
Lu12-564607	12	564607	C/T	-0.3102		2015p3	FASTmrMLM	7.4548
Lu12-1196812	12	1196812	C/T	0.4741		2015p3	FASTmrMLM	7.8984
Lu12-16358216	12	16358216	G/A	-0.245		2015p3	FASTmrMLM	4.5446
Lu13-646015	13	646015	A/G	0.1709		2015p3	FASTmrMLM	3.1519
Lu1-3420323	1	3420323	G/A	-0.2224		2016P4	FASTmrMLM	3.791
Lu1-6100723	1	6100723	G/A	0.1747		2016P4	FASTmrMLM	3.0098
Lu1-8785558	1	8785558	T/A	0.2662		2016P4	FASTmrMLM	3.6561
Lu1-28802582	1	28802582	A/G	0.1607		2016P4	FASTmrMLM	3.3172
Lu3-751726	3	751726	C/T	0.2074		2016P4	FASTmrMLM	3.4479
Lu3-17811882	3	17811882	C/T	0.2502		2016P4	FASTmrMLM	5.1983
Lu4-3067314	4	3067314	C/T	-0.2067		2016P4	FASTmrMLM	5.7977
Lu5-5732513	5	5732513	A/C	0.3165		2016P4	FASTmrMLM	3.8522
Lu5-10415458	5	10415458	C/T	0.291		2016P4	FASTmrMLM	9.7856
Lu7-16743479	7	16743479	T/G	-0.2484		2016P4	FASTmrMLM	4.2397
Lu8-6725206	8	6725206	A/G	-0.1496		2016P4	FASTmrMLM	4.2339
Lu12-6564789	12	6564789	C/T	-0.1829		2016P4	FASTmrMLM	4.4989
Lu13-13051094	13	13051094	G/C	-0.2878		2016P4	FASTmrMLM	7.7483
Lu14-3666172	14	3666172	C/T	-0.1658		2016P4	FASTmrMLM	3.1113
Lu14-5887299	14	5887299	A/G	0.2869		2016P4	FASTmrMLM	6.2598
Lu14-13746390	14	13746390	C/T	0.2316		2016P4	FASTmrMLM	4.4656
Lu14-16645549	14	16645549	C/T	0.4061		2016P4	FASTmrMLM	6.4162
Lu15-1002029	15	1002029	T/C	0.3004		2016P4	FASTmrMLM	7.1147
Lu15-12915204	15	12915204	G/A	-0.2274		2016P4	FASTmrMLM	4.9303
Lu15-13809415	15	13809415	G/A	-0.2976		2016P4	FASTmrMLM	5.2069
Lu1-7090793	1	7090793	A/T	0.2954		Mean	FASTmrMLM	7.3832
Lu1-10547654	1	10547654	T/C	0.1498		Mean	FASTmrMLM	3.3233
Lu1-15921509	1	15921509	G/A	0.1889		Mean	FASTmrMLM	5.3038
Lu2-20581426	2	20581426	G/A	0.094		Mean	FASTmrMLM	3.3935
Lu3-1824668	3	1824668	T/C	-0.1667		Mean	FASTmrMLM	4.8074
Lu3-6891789	3	6891789	G/T	0.3402		Mean	FASTmrMLM	6.2638
Lu3-16419163	3	16419163	C/T	-0.2783		Mean	FASTmrMLM	5.3202
Lu3-18524714	3	18524714	A/G	0.1434		Mean	FASTmrMLM	3.8548
Lu4-13306407	4	13306407	A/G	-0.2297		Mean	FASTmrMLM	5.0651
Lu4-14810573	4	14810573	G/T	0.2427		Mean	FASTmrMLM	9.0212
Lu4-17214936	4	17214936	G/T	-0.2218		Mean	FASTmrMLM	6.2566
Lu5-2615705	5	2615705	C/T	-0.1509		Mean	FASTmrMLM	5.2792
Lu5-10360192	5	10360192	C/T	0.2203		Mean	FASTmrMLM	7.3891
Lu7-15625878	7	15625878	G/A	0.1324		Mean	FASTmrMLM	3.6595
Lu8-14317356	8	14317356	A/T	0.2402		Mean	FASTmrMLM	4.2531
Lu8-20030216	8	20030216	A/G	0.2383		Mean	FASTmrMLM	10.4363
Lu8-22525597	8	22525597	C/T	-0.141		Mean	FASTmrMLM	3.946
Lu9-4333365	9	4333365	C/A	0.3743		Mean	FASTmrMLM	6.6106
Lu10-6096221	10	6096221	A/G	0.0671		Mean	FASTmrMLM	3.6094
Lu12-761493	12	761493	G/A	0.0952		Mean	FASTmrMLM	3.005
Lu12-1349235	12	1349235	A/T	0.2159		Mean	FASTmrMLM	10.0372
Lu12-4327283	12	4327283	G/A	-0.1641		Mean	FASTmrMLM	4.2797
Lu12-6564789	12	6564789	C/T	-0.2371		Mean	FASTmrMLM	11.0516
Lu13-2007925	13	2007925	T/C	0.226		Mean	FASTmrMLM	6.5098
Lu14-17939559	14	17939559	G/A	0.1252		Mean	FASTmrMLM	4.3027
Lu15-14237747	15	14237747	C/T	0.423		Mean	FASTmrMLM	9.8462
Lu4-14738243	4	14738243	G/T	-0.38302	1.26e-07	2012p4	FarmCPU
Lu7-17884613	7	17884613	G/A	0.371851	6.54e-09	2012p4	FarmCPU
Lu12-2719326	12	2719326	C/T	-0.471982	1.24e-08	2012p4	FarmCPU
Lu8-7639020	8	7639020	C/A	0.667177	1.19e-07	2013p4	FarmCPU
Lu12-5578883	12	5578883	G/A	-0.468931	5.76e-09	2013p4	FarmCPU
Lu6-3099718	6	3099718	G/A	-0.368826	1.27e-07	2014p3	FarmCPU
Lu7-2453683	7	2453683	A/G	-0.414011	2.65e-08	2014p3	FarmCPU
Lu7-11375917	7	11375917	C/G	-0.690412	1.71e-07	2014p3	FarmCPU
Lu9-4333365	9	4333365	C/A	0.782435	1.83e-07	2014p3	FarmCPU
Lu12-6532217	12	6532217	G/A	0.681932	1.63e-11	2014p3	FarmCPU
Lu13-1917918	13	1917918	T/C	0.413006	4.89e-08	2014p3	FarmCPU
Lu1-4886034	1	4886034	C/T	-0.533245	3.06e-12	2015p3	FarmCPU
Lu1-7819596	1	7819596	A/C	-0.376855	3.23e-10	2015p3	FarmCPU
Lu2-5746268	2	5746268	A/T	0.322463	1.61e-07	2015p3	FarmCPU
Lu7-15926259	7	15926259	T/C	-0.397686	1.19e-07	2015p3	FarmCPU
Lu13-15586395	13	15586395	A/T	-0.319416	1.31e-08	2015p3	FarmCPU
Lu7-17229239	7	17229239	G/T	0.278006	1.14051e-09	2016p4	FarmCPU
Lu15-974597	15	974597	G/C	0.507494	3.70629e-09	2016p4	FarmCPU
Lu4-14738243	4	14738243	G/T	-0.313611	2.70335e-11	Mean	FarmCPU
Lu8-14317356	8	14317356	A/T	-0.33422	6.69915e-11	Mean	FarmCPU
Lu8-15841943	8	15841943	G/T	-0.318709	2.91198e-08	Mean	FarmCPU
Lu10-5757355	10	5757355	T/G	-0.202296	1.37973e-07	Mean	FarmCPU
Lu12-18215241	12	18215241	G/A	0.240636	1.07178e-08	Mean	FarmCPU
Lu13-1832342	13	1832342	G/C	-0.294344	7.51648e-09	Mean	FarmCPU
Lu13-6142918	13	6142918	C/T	-0.257008	7.15257e-08	Mean	FarmCPU
Lu14-1526396	14	1526396	A/G	0.242701	1.15301e-08	Mean	FarmCPU
