# Supplementary material for: Genome-Wide Association Studies for Pasmo Resistance in Flax (<em>Linum Usitatissimum L.</em>)
Source: Preprints.org preprint supplement (doi:10.20944/preprints201811.0336.v1), 2018-11-14
Supplement: Supplementary file 3 [file Supplementary_Table_S6.xlsx]

## Sheet: Accession_Clusters
Table S6. Cluster analyses of the 370 accessions and 67 QTL with geographical origins and morphotype information.
Accession Name	Improvement Status	Cluster No.	Morphotype	Origin Fullname	Origin Abbr	Sub Region	Sub Region Abbr	NPQTL	Pasmo Mean	Allele Haplotype of 67 QTL	Genotype Haplotype of 67 QTL
CN100952	Unknown	1	Oil	AFGHANISTAN	AFG	Southern Aisa	SAS	14	8.2	GGTGAGGATGAGCGACGACGTCCAACTGATATGCCGGTCTTGGCAGCGAATTCCACACGGCGCGTTC	BBBBBBBABBBBAAABABBBABBBBBBBBABBABBBBBBBBBBBBBABBBBBBAABBAABBBABBBB
CN101486	Breeding line	1	Oil	CANADA	CAN	North America	NA	14	6.6	GGCGAGGATATTAGTCGACGTCCAACTGACATACCGGTCTTGGCAGTGGACTCCACAAGGCGCGTTC	BBABBBBABAAABABBABBBABBBBBBBBBBBBBBBBBBBBBBBBBBBABABBAABBBABBBABBBB
CN98704	Cultivar	1	Oil	CZECH REPUBLIC	CZE	Central and Eastern Europe	CEE	11	6.4	GGCGAGGATATGCGTCCACGCCCAACTGACATACCGGTCTTGGCAGTGAATTCCACAAAGGGCGTAC	BBABBBBABAABAABBBBBBBBBBBBBBBBBBBBBBBBBBBBBBBBBBBBBBBAABBBBBABABBAB
CN98826	Cultivar	1	Oil	EGYPT	EGY	Africa	AF	16	6.8	AGCGAGGATGAGCGTCCACGTCCAATCAACATACCGGTCTTGGCAGCGAACTCCACAAGGCACGTTC	ABABBBBABBBBAABBBBBBABBBBAAABBBBBBBBBBBBBBBBBBABBBABBAABBBABBAABBBB
CN97351	Cultivar	1	Fibre	FRANCE	FRA	Western Europe	WE	19	5.6	GGCGAGAGTATTCGTCCGCGTTCAATCAACTCACCGGTCTTGGCAGTGAATTCCGGAAGGCGCGTTC	BBABBBABBAAAAABBBABBAABBBAAABBAABBBBBBBBBBBBBBBBBBBBBABABBABBBABBBB
CN98710	Landrace	1	Oil	FRANCE	FRA	Western Europe	WE	13	7	GGTGAGGATGAGATTCGGCGTCCAACTGTCATACCGGTCTTGGCAGCGGACTCCGCAAGGGGCATTC	BBBBBBBABBBBBBBBAABBABBBBBBBABBBBBBBBBBBBBBBBBABABABBABBBBABABAABBB
CN98286	Cultivar	1	Fibre	HUNGARY	HUN	Central and Eastern Europe	CEE	18	7.4	GGCGAGGGTGAGCGTCGACGTCCAACTGACATACCGGTCTTGGAGACGGACTTCAGAAAGCACATTC	BBABBBBBBBBBAABBABBBABBBBBBBBBBBBBBBBBBBBBBAAAABABABAAAABBBBBAAABBB
CN98303	Cultivar	1	Oil	HUNGARY	HUN	Central and Eastern Europe	CEE	11	7.2	GGCGAGGGTGAGCGACCACGCCCAATCGACATACGGGTCTTGGCAGTGGATTCAACAAGGCGCGTTC	BBABBBBBBBBBAAABBBBBBBBBBAABBBBBBBABBBBBBBBBBBBBABBBBBABBBABBBABBBB
CN100795	Cultivar	1	Fibre	NETHERLANDS	NLD	Western Europe	WE	18	6	GGCGAGGATGAGCGACGACGCCCAACCAACATACCGGTCTTGGCAACGGATTTCGCAAGGCGCAAAC	BBABBBBABBBBAAABABBBBBBBBBAABBBBBBBBBBBBBBBBBAABABBBAABBBBABBBAAAAB
CN97424	Cultivar	1	Fibre	NETHERLANDS	NLD	Western Europe	WE	20	5.8	AGTGAGGATGAGCGTCGACGTCCAACTGACATACCGGTCTTGGCGACGGACTCCAGAAGGGACGAAC	ABBBBBBABBBBAABBABBBABBBBBBBBBBBBBBBBBBBBBBBAAABABABBAAABBABAAABAAB
CN97610	Cultivar	1	Fibre	NETHERLANDS	NLD	Western Europe	WE	17	6.2	GGCGAGGATGAGCGACGACGTCCAACCAACATACCGGTCTTGGCAACGAATTCCAGAAGGCGCATTC	BBABBBBABBBBAAABABBBABBBBBAABBBBBBBBBBBBBBBBBAABBBBBBAAABBABBBAABBB
CN97616	Cultivar	1	Oil	NETHERLANDS	NLD	Western Europe	WE	12	8.4	GGCGAGGATGAGAGTCCACGTCCAATTGACATACCGGTCTTGGCGGCGGACTCCACAAGGCGGGTTC	BBABBBBABBBBBABBBBBBABBBBABBBBBBBBBBBBBBBBBBABABABABBAABBBABBBBBBBB
CN101407	Unknown	1	Fibre	NETHERLANDS	NLD	Western Europe	WE	16	4.8	GGCGAGGATGAGCGTCGACGTCCAACTAACATATCGGTCTTGGCAGTGGACTTCAGAAGGCGCGTTC	BBABBBBABBBBAABBABBBABBBBBBABBBBBABBBBBBBBBBBBBBABABAAAABBABBBABBBB
CN101116	Breeding line	1	Fibre	RUSSIAN FEDERATION	RUS	Central and Eastern Europe	CEE	17	7.2	AGCGAGGATAATCGTCGACGTCCAACTGACATACGGGTCTTCGCAGTGAACTCCACAAGACGCGTTC	ABABBBBABABAAABBABBBABBBBBBBBBBBBBABBBBBBABBBBBBBBABBAABBBAABBABBBB
CN101154	Cultivar	1	Fibre	RUSSIAN FEDERATION	RUS	Central and Eastern Europe	CEE	24	4.6	GGCGACAATAAGCGTCGACGTCTAACTGACTTGTCGGCCTTGGCAGCGAACACCACAAGGCACATTG	BBABBAAABABBAABBABBBABABBBBBBBABAABBBABBBBBBBBABBBAABAABBBABBAAABBA
CN32542	Cultivar	1	Oil	RUSSIAN FEDERATION	RUS	Central and Eastern Europe	CEE	13	6.2	GGTGACGATGAGCGTCCACGTCCAACTGACATACCGGTCTTGGCAGCGGACTCCACAAGGCGCATTC	BBBBBABABBBBAABBBBBBABBBBBBBBBBBBBBBBBBBBBBBBBABABABBAABBBABBBAABBB
CN97503	Landrace	1	Fibre	RUSSIAN FEDERATION	RUS	Central and Eastern Europe	CEE	14	8	GGCGAGGGTGAGCGACGACGCCCAATCAACATACCGGTCTTGGCGGTGAATTCCAGAAGGCGCGTTC	BBABBBBBBBBBAAABABBBBBBBBAAABBBBBBBBBBBBBBBBABBBBBBBBAAABBABBBABBBB
CN97530	Landrace	1	Fibre	RUSSIAN FEDERATION	RUS	Central and Eastern Europe	CEE	14	6.8	GGCGAGGATAAGCGTCGACGTCCAACTAACATACCGGTCTTCGCGGCGAATTTCGCAAGGCGGGTTC	BBABBBBABABBAABBABBBABBBBBBABBBBBBBBBBBBBABBABABBBBBAABBBBABBBBBBBB
CN97531	Landrace	1	Fibre	RUSSIAN FEDERATION	RUS	Central and Eastern Europe	CEE	16	6	AGCGAGGGTGAGCGTCCACGTCCAACTGACATACCGGTCTTGGCAATGAACTTCAGAAAGCACAAAC	ABABBBBBBBBBAABBBBBBABBBBBBBBBBBBBBBBBBBBBBBBABBBBABAAAABBBBBAAAAAB
CN97533	Landrace	1	Fibre	RUSSIAN FEDERATION	RUS	Central and Eastern Europe	CEE	11	7.2	GGTGAGGATGAGATTCGACGTCCAACTGACATACCGGTCTTCGCGGTGGATTTCAGAAAGCGCGTTC	BBBBBBBABBBBBBBBABBBABBBBBBBBBBBBBBBBBBBBABBABBBABBBAAAABBBBBBABBBB
CN101348	Unknown	1	Oil	RUSSIAN FEDERATION	RUS	Central and Eastern Europe	CEE	12	7.8	GGTGAGGATGAGCGTCGACGTCCAACTGACATATCGGTCTTGGCAGTGGATTTCGGAAGGCGCGTTC	BBBBBBBABBBBAABBABBBABBBBBBBBBBBBABBBBBBBBBBBBBBABBBAABABBABBBABBBB
CN101364	Unknown	1	Fibre	RUSSIAN FEDERATION	RUS	Central and Eastern Europe	CEE	15	7.6	AGCGAGGGTGAGCGTCCACGTCCAACTGACATACCGGTCTTGGCGACGAACTCCAGAAAGCGCGAAC	ABABBBBBBBBBAABBBBBBABBBBBBBBBBBBBBBBBBBBBBBAAABBBABBAAABBBBBBABAAB
CN101402	Unknown	1	Oil	RUSSIAN FEDERATION	RUS	Central and Eastern Europe	CEE	10	6.8	GGCGAGGATGAGAGACCACGTTCAACTGACATACCGGTCTTGGCAGTGAACTCAACAAGGCGGATTC	BBABBBBABBBBBAABBBBBAABBBBBBBBBBBBBBBBBBBBBBBBBBBBABBBABBBABBBBABBB
CN97871	Cultivar	1	Fibre	SWEDEN	SWE	Northern Europe	NE	14	5.3	GGCGAGGATAAGCGTCCGCGTCCAACTGACATACCGGTCTTGGCAGTGGACTCCACAAGGCGCATTC	BBABBBBABABBAABBBABBABBBBBBBBBBBBBBBBBBBBBBBBBBBABABBAABBBABBBAABBB
CN101382	Unknown	1	Oil	TURKEY	TUR	Western Aisa	WA	20	7	GGCGAGGATAAGCGTCCACATCCAATCAACATACCGGTCCTGGCAGTGAATTCCAGAAGGGACATAC	BBABBBBABABBAABBBBBAABBBBAAABBBBBBBBBBBABBBBBBBBBBBBBAAABBABAAAABAB
CN101385	Unknown	1	Oil	TURKEY	TUR	Western Aisa	WA	13	7.4	GGCGAGGGTGAGCGTCGACGTCCAATCAACATACCGGTCTTGGCAGTGGATTCCACAAGGCGGATTC	BBABBBBBBBBBAABBABBBABBBBAAABBBBBBBBBBBBBBBBBBBBABBBBAABBBABBBBABBB
CN101386	Unknown	1	Oil	TURKEY	TUR	Western Aisa	WA	19	7.2	AACGACGATATGCGTCCACGTCCAACTGACATACCGGTCTTGGCGGCGAACTCCACAAAGGACATTC	AAABBABABAABAABBBBBBABBBBBBBBBBBBBBBBBBBBBBBABABBBABBAABBBBBAAAABBB
CN32546	Cultivar	1	Fibre	UKRAINE	UKR	Central and Eastern Europe	CEE	13	7	GGCGAGGATATTCGTCCACGTCCAACTGACATACCGGTCTTGGCAGTGAACTCCACAAGGCGGATTC	BBABBBBABAAAAABBBBBBABBBBBBBBBBBBBBBBBBBBBBBBBBBBBABBAABBBABBBBABBB
CN101378	Unknown	1	Oil	UKRAINE	UKR	Central and Eastern Europe	CEE	12	7	GGCGACGATGAGATACCACGTCCAACTGACATACCGGTCTTGGCAGCGGACTCCGGAAGGCGCGTTC	BBABBABABBBBBBABBBBBABBBBBBBBBBBBBBBBBBBBBBBBBABABABBABABBABBBABBBB
CN101379	Unknown	1	Fibre	UKRAINE	UKR	Central and Eastern Europe	CEE	11	7.2	GGCGAGGATGAGATACGACGTCCAACTGACATATCGGTCTTCGCAGTGGATTCCGGAAAGCGCGTTC	BBABBBBABBBBBBABABBBABBBBBBBBBBBBABBBBBBBABBBBBBABBBBABABBBBBBABBBB
CN101397	Unknown	1	Oil	UKRAINE	UKR	Central and Eastern Europe	CEE	15	6.6	GGCGAGAATGAGCTACGACGTCCAACTGACATACCGGTCTTCGCAGCGGACTCCGCACGGCGCGTTC	BBABBBAABBBBABABABBBABBBBBBBBBBBBBBBBBBBBABBBBABABABBABBBAABBBABBBB
CN97665	Breeding line	1	Oil	UNITED STATES	USA	North America	NA	11	7.8	GGCGAGGATGAGCGTCGACGCCCAGCTGACATACCGGTCTTGGCGACGAACTCAGCAAAGCGCGTTC	BBABBBBABBBBAABBABBBBBBBABBBBBBBBBBBBBBBBBBBAAABBBABBBBBBBBBBBABBBB
CN98934	Cultivar	1	Fibre	UNITED STATES	USA	North America	NA	16	6.4	AGCGAGGATAAGCGACGACGTCCAACTGACATACCGGTCTTGGCGGTGAACTCCACAAAAGGCGTTC	ABABBBBABABBAAABABBBABBBBBBBBBBBBBBBBBBBBBBBABBBBBABBAABBBBAABABBBB
CN98176	Cultivar	1	Oil	AFGHANISTAN	AFG	Southern Aisa	SAS	8	8	GGTGAGGATGAGCGTCCACGCCCAACCAACTCACCGGTCTTGGCAGTGAACTCAGCAAAGCGGGTTC	BBBBBBBABBBBAABBBBBBBBBBBBAABBAABBBBBBBBBBBBBBBBBBABBBBBBBBBBBBBBBB
CN100807	Breeding line	1	Oil	AFGHANISTAN	AFG	Southern Aisa	SAS	15	7	GATGAGGATGAGCGTCGACGCCCAATCGACTCACCGGTCTTGGCAGTAGATTCAGGAAGGCGCATTC	BABBBBBABBBBAABBABBBBBBBBAABBBAABBBBBBBBBBBBBBBAABBBBBBABBABBBAABBB
CN101338	Unknown	1	Oil	AFGHANISTAN	AFG	Southern Aisa	SAS	18	5.8	GACGAGGATGAGCGTCGACGTCCGGTCGATATACGGGTCTTGGAAGCGAATTTCGCAAAACGGGTTC	BAABBBBABBBBAABBABBBABBAAAABBABBBBABBBBBBBBABBABBBBBAABBBBBABBBBBBB
CN98037	Breeding line	1	Oil	ARGENTINA	ARG	South America	SA	15	4.8	GGCGACGATAATCGTCCACGTCCAACTGACATACCGGTCTTGGCAGCGAACTCCACAAGGCGCATTC	BBABBABABABAAABBBBBBABBBBBBBBBBBBBBBBBBBBBBBBBABBBABBAABBBABBBAABBB
CN98037B	Breeding line	1	Oil	ARGENTINA	ARG	South America	SA	17	7.3	GGTGAGGATATTCGTGCACGTTCAATCGACATACCGGTCTTGGCAGTGAACTCCGGAAAGCGCATTG	BBBBBBBABAAAAABABBBBAABBBAABBBBBBBBBBBBBBBBBBBBBBBABBABABBBBBBAABBA
CN97214	Cultivar	1	Oil	ARGENTINA	ARG	South America	SA	12	7.2	GGCGAGGATATGCGTCCACGCCCAACTGACATACCGGTCTTGGCAGTGAATTCCACAAGGCGCATAC	BBABBBBABAABAABBBBBBBBBBBBBBBBBBBBBBBBBBBBBBBBBBBBBBBAABBBABBBAABAB
CN97953	Cultivar	1	Oil	ARGENTINA	ARG	South America	SA	11	6	GGTGAGGATATGCGACGACGCCCAACTGACTTACCGGTCTTGGCAGTGGATTCAGCAAAGCGCATTC	BBBBBBBABAABAAABABBBBBBBBBBBBBABBBBBBBBBBBBBBBBBABBBBBBBBBBBBBAABBB
CN97958	Cultivar	1	Oil	ARGENTINA	ARG	South America	SA	13	6.8	GACGAGGATATGCGTCCGCGCCCAACTGACTCACCGGTCTTGGCAGTGAATTCAGCGAAGCGCGTAC	BAABBBBABAABAABBBABBBBBBBBBBBBAABBBBBBBBBBBBBBBBBBBBBBBBABBBBBABBAB
CN97961	Cultivar	1	Oil	ARGENTINA	ARG	South America	SA	11	7.8	GGCGAGGATGTGCGTCCACGCCCAACCGACTCACCGGTCTTGGCAGTGAATTCAGCGAAGCGCATTC	BBABBBBABBABAABBBBBBBBBBBBABBBAABBBBBBBBBBBBBBBBBBBBBBBBABBBBBAABBB
CN97967	Cultivar	1	Oil	ARGENTINA	ARG	South America	SA	16	7.2	GATGACGGTATGCGTCGGTGCCCAACTGACATACCGGTCTTGGCAGTGATCTCCGGAAGGCGCATTC	BABBBABBBAABAABBAAABBBBBBBBBBBBBBBBBBBBBBBBBBBBBBAABBABABBABBBAABBB
CN97980	Cultivar	1	Oil	ARGENTINA	ARG	South America	SA	10	8.4	GGCGAGGGTGAGCGTCCACGTCCAACTGATACACCGGTCTTGGCAGTGAACTCAGCAAGGCGCATTC	BBABBBBBBBBBAABBBBBBABBBBBBBBABABBBBBBBBBBBBBBBBBBABBBBBBBABBBAABBB
CN98007	Cultivar	1	Oil	ARGENTINA	ARG	South America	SA	14	7	GACGAGGATATGCGTGCACGCCCAACTGATACACCGGTCTTGGCAGTGAATTCCGCGAAGGGCGTTC	BAABBBBABAABAABABBBBBBBBBBBBBABABBBBBBBBBBBBBBBBBBBBBABBABBBABABBBB
CN98012	Cultivar	1	Oil	ARGENTINA	ARG	South America	SA	13	7	GGCGAGGATATGCGTCCACGTCCAACTGACATACCGGTCTTGGCAGTGAATTCCGGAAAGGGGATAG	BBABBBBABAABAABBBBBBABBBBBBBBBBBBBBBBBBBBBBBBBBBBBBBBABABBBBABBABAA
CN98014	Cultivar	1	Oil	ARGENTINA	ARG	South America	SA	11	8.4	GGTGAGGATGAGCGTCCACGTCCAATCAACATACCGGTCTTGGCAGTGAATTCAGCAAGGCACATTC	BBBBBBBABBBBAABBBBBBABBBBAAABBBBBBBBBBBBBBBBBBBBBBBBBBBBBBABBAAABBB
CN98027	Cultivar	1	Oil	ARGENTINA	ARG	South America	SA	9	7.6	GGTGAGGATGTGAGTCCACGCTCAACTAACATACCGGTCTTGGCAGTGAATTCCGGAAGGCGGATTC	BBBBBBBABBABBABBBBBBBABBBBBABBBBBBBBBBBBBBBBBBBBBBBBBABABBABBBBABBB
CN98039	Cultivar	1	Oil	ARGENTINA	ARG	South America	SA	11	7	GGCGAGGATATGCGTCGACGCCCAACTGACTCACCGGTCTTGGCAGTGAATTCAGCAAAGCGGATTG	BBABBBBABAABAABBABBBBBBBBBBBBBAABBBBBBBBBBBBBBBBBBBBBBBBBBBBBBBABBA
CN98279	Cultivar	1	Oil	ARGENTINA	ARG	South America	SA	11	7.4	GGCGAGGATAAGCGTCCACGTCCAACTGACATACCGGTCTTGGCAGCGAACTCAACAAGGCGGATTC	BBABBBBABABBAABBBBBBABBBBBBBBBBBBBBBBBBBBBBBBBABBBABBBABBBABBBBABBB
CN98634	Cultivar	1	Oil	ARGENTINA	ARG	South America	SA	18	5.8	GGCGAGGATATTCGTCCACGTTCAACTGATATACCGGTCTTGGCAGTGGATTCCGGAAGGGGCATAC	BBABBBBABAAAAABBBBBBAABBBBBBBABBBBBBBBBBBBBBBBBBABBBBABABBABABAABAB
CN101373	Unknown	1	Oil	ARMENIA	ARM	Western Aisa	WA	14	5.6	GGCGAGGATGAGCGACCACGTCCGACTAACATACCGGTCTTGGCAGTGGACTCCGCAAGGCGCATTC	BBABBBBABBBBAAABBBBBABBABBBABBBBBBBBBBBBBBBBBBBBABABBABBBBABBBAABBB
CN98984	Cultivar	1	Oil	AUSTRALIA	AUS	Oceania	OC	13	7.2	GGCGACGATAATCGTCCACGCCCAACTGACATACCGGTCTTGGCAGCGAACTCCACAAGGCGGATTC	BBABBABABABAAABBBBBBBBBBBBBBBBBBBBBBBBBBBBBBBBABBBABBAABBBABBBBABBB
CN101448	Breeding line	1	Oil	CANADA	CAN	North America	NA	21	6	AGTGAGGATGAGCGTCGACGTCCAACTGACATACCGGTCTTGGCGACGGACTCCAGAAGGGACGAAG	ABBBBBBABBBBAABBABBBABBBBBBBBBBBBBBBBBBBBBBBAAABABABBAAABBABAAABAAA
CN101463	Breeding line	1	Oil	CANADA	CAN	North America	NA	11	7.6	GGTGAGGATATGCGTCCACGTCCAACTGACATACCGGTCTTGGCAGTGGATTCCAGAAAGCGGGTAC	BBBBBBBABAABAABBBBBBABBBBBBBBBBBBBBBBBBBBBBBBBBBABBBBAAABBBBBBBBBAB
CN101466	Breeding line	1	Oil	CANADA	CAN	North America	NA	14	6	GGCGAGGATAATCGTCCACGTCCAACTGACATACCGGTCTTCGCAGTGAACTCCACAAGGCGCGTAC	BBABBBBABABAAABBBBBBABBBBBBBBBBBBBBBBBBBBABBBBBBBBABBAABBBABBBABBAB
CN101469	Breeding line	1	Oil	CANADA	CAN	North America	NA	12	6.4	GGCGAGGATAAGCGTCCACGCCCAACTGACATACCGGTCTTGGCAGTGGACTCCACAAGGCGCATTC	BBABBBBABABBAABBBBBBBBBBBBBBBBBBBBBBBBBBBBBBBBBBABABBAABBBABBBAABBB
CN101471	Breeding line	1	Oil	CANADA	CAN	North America	NA	16	6.2	GGCGAGGATAATCGTCCACGTCCAATTGATATACCAGTCTTGGCAGTGAACTCCACAAGGCGCATTC	BBABBBBABABAAABBBBBBABBBBABBBABBBBBABBBBBBBBBBBBBBABBAABBBABBBAABBB
CN101472	Breeding line	1	Oil	CANADA	CAN	North America	NA	18	5.8	GGCGAGGATGATCGTGGACGCCCAATCAATATACCAGTCTTGGCAGTGGACTCAAGAAGGCGCGTTC	BBABBBBABBBAAABAABBBBBBBBAAABABBBBBABBBBBBBBBBBBABABBBAABBABBBABBBB
CN101482	Breeding line	1	Oil	CANADA	CAN	North America	NA	19	7	GGCGAGGATGATCGTGGACGCCCAATCAATATACCAGTCTTGGCAGTGGACTCCGGAAGGCGCATTC	BBABBBBABBBAAABAABBBBBBBBAAABABBBBBABBBBBBBBBBBBABABBABABBABBBAABBB
CN101493	Breeding line	1	Oil	CANADA	CAN	North America	NA	12	6.2	GGTGAGGATAATAGTCCACGTCCAACTGACATACCGGTCTTGGCAGCGAACTCCACAAGGCGCATTC	BBBBBBBABABABABBBBBBABBBBBBBBBBBBBBBBBBBBBBBBBABBBABBAABBBABBBAABBB
CN101496	Breeding line	1	Oil	CANADA	CAN	North America	NA	9	7.2	GGTGAGGGTAAGCGTCCACGCCCAACTGATATACCGGTCTTGGCAGTGGACTCCGCAAAGCGCATTC	BBBBBBBBBABBAABBBBBBBBBBBBBBBABBBBBBBBBBBBBBBBBBABABBABBBBBBBBAABBB
CN101554	Breeding line	1	Oil	CANADA	CAN	North America	NA	13	6.2	GGCGAGGATAAGCGTCCACGTCCAACTGATATACCGGTCTTGGCAGCGAACTTCGGAAAGCGCGTTC	BBABBBBABABBAABBBBBBABBBBBBBBABBBBBBBBBBBBBBBBABBBABAABABBBBBBABBBB
CN101565	Breeding line	1	Oil	CANADA	CAN	North America	NA	22	6	GACGAGGATAATCGTGCACGTCCAATCAATACACGGGTCTTGGCAGTAGATTCAAGAAGGCGCATTC	BAABBBBABABAAABABBBBABBBBAAABABABBABBBBBBBBBBBBAABBBBBAABBABBBAABBB
CN101580	Breeding line	1	Oil	CANADA	CAN	North America	NA	13	5.8	GGCGAGGATATGCGTCCACGCCCAACTGACATACCGGTCTTGGCAGTAATTTCCACAAAGGGCGTAC	BBABBBBABAABAABBBBBBBBBBBBBBBBBBBBBBBBBBBBBBBBBABABBBAABBBBBABABBAB
CN101594	Breeding line	1	Oil	CANADA	CAN	North America	NA	10	6.2	GGCGAGGATAAGCGACCACGCCCAACTGACATACCGATCTTGGCAGTGAACTCAGGAAAGCGCGTTC	BBABBBBABABBAAABBBBBBBBBBBBBBBBBBBBBABBBBBBBBBBBBBABBBBABBBBBBABBBB
CN101595	Breeding line	1	Oil	CANADA	CAN	North America	NA	19	5.2	GACGAGGATGATCGACGACGCCCAATCGACATACGGGTCTTGGCAGTGAACTCCAGGAAGCGCATAC	BAABBBBABBBAAAABABBBBBBBBAABBBBBBBABBBBBBBBBBBBBBBABBAAAABBBBBAABAB
CN101596	Breeding line	1	Oil	CANADA	CAN	North America	NA	21	4.8	AACGAGGATATGCGACGACGTCCAACTGACATACCGGTCTTCGCAGTGATCTTCGGAAGGGGCGTAC	AAABBBBABAABAAABABBBABBBBBBBBBBBBBBBBBBBBABBBBBBBAABAABABBABABABBAB
CN101600	Breeding line	1	Oil	CANADA	CAN	North America	NA	16	4.6	AGCGAGGATGAGCGACCACATCCGACTGACTTACCGGTCTTGGCAGTGGACTCCACAAGGCGCGTTC	ABABBBBABBBBAAABBBBAABBABBBBBBABBBBBBBBBBBBBBBBBABABBAABBBABBBABBBB
CDCGold	Cultivar	1	Oil	CANADA	CAN	North America	NA	15	6.5	GGCAAGGATATGCGTCCACGTCCAATTGACATACGGGTCTTGGCAGTGAACTCCACAAGGCGCGTTC	BBAABBBABAABAABBBBBBABBBBABBBBBBBBABBBBBBBBBBBBBBBABBAABBBABBBABBBB
CDCMons	Cultivar	1	Oil	CANADA	CAN	North America	NA	21	5.5	AGCGAGGATATGCGTCCACGTCCAATCGACATACCGGTCCTGGCAGCGGACTCCAGAAAGGACATTC	ABABBBBABAABAABBBBBBABBBBAABBBBBBBBBBBBABBBBBBABABABBAAABBBBAAAABBB
CDCSorrel	Cultivar	1	Oil	CANADA	CAN	North America	NA	21	4.5	GGTGAGAATATGCGTCCACGTCCAATCATCATACCGGTCTTGGCGGCGGACTCCAGAAAGGGGATAC	BBBBBBAABAABAABBBBBBABBBBAAAABBBBBBBBBBBBBBBABABABABBAAABBBBABBABAB
CN101413	Cultivar	1	Oil	CANADA	CAN	North America	NA	13	7	GGTGAGGATGAGCGTCCACGTTCAATTGTCATACCGGTCTTGGCGGCGAATTCCACAAGGCGGATTC	BBBBBBBABBBBAABBBBBBAABBBABBABBBBBBBBBBBBBBBABABBBBBBAABBBABBBBABBB
CN18973	Cultivar	1	Oil	CANADA	CAN	North America	NA	13	5.8	GGCGAGGGTGAGCGTCCACGTCCAATCAACATACCGGTCTTGGCAGTGGACTCCACAAAGCGCATTC	BBABBBBBBBBBAABBBBBBABBBBAAABBBBBBBBBBBBBBBBBBBBABABBAABBBBBBBAABBB
CN18979	Cultivar	1	Oil	CANADA	CAN	North America	NA	14	6.6	GGCGACGATATGCGTCCACGTCCAACTGACATACCGGTCTTGGCAGCGAACTCCACAAGGCGGATTC	BBABBABABAABAABBBBBBABBBBBBBBBBBBBBBBBBBBBBBBBABBBABBAABBBABBBBABBB
CN18980	Cultivar	1	Oil	CANADA	CAN	North America	NA	22	6.4	AGCGAGAATGAGCGTCCACGTCCAATCATCATACCGGTATTGGCGGCGGACTCCAGAAAGGGCATTC	ABABBBAABBBBAABBBBBBABBBBAAAABBBBBBBBBABBBBBABABABABBAAABBBBABAABBB
CN18981	Cultivar	1	Oil	CANADA	CAN	North America	NA	13	6.6	GGTGAGAATGAGCGTCCACGTCCAACTGACATACCGGTCTTGGCGGCGAACTCCAGAAGGCGGATTC	BBBBBBAABBBBAABBBBBBABBBBBBBBBBBBBBBBBBBBBBBABABBBABBAAABBABBBBABBB
CN19003	Cultivar	1	Oil	CANADA	CAN	North America	NA	19	5.8	AGCGACGATATGCGTCGACGTCCAATTGTCATACCGGTCTTGGCAGCGAACTCCACAAGGCGCATTC	ABABBABABAABAABBABBBABBBBABBABBBBBBBBBBBBBBBBBABBBABBAABBBABBBAABBB
CN19004	Cultivar	1	Oil	CANADA	CAN	North America	NA	15	6.6	GGCGAGGATATGCGTCCACGTCCAACTGACATACCGGCATTGGCAGCGAACTCAACAAGGCGCATTC	BBABBBBABAABAABBBBBBABBBBBBBBBBBBBBBBAABBBBBBBABBBABBBABBBABBBAABBB
CN19005	Cultivar	1	Oil	CANADA	CAN	North America	NA	16	5.6	GGTGAGGGTGAGCGTCCACGTCCAATCGTCATACCGGTCCTGGCGGCGGACTCCAGAAAGCGCATTC	BBBBBBBBBBBBAABBBBBBABBBBAABABBBBBBBBBBABBBBABABABABBAAABBBBBBAABBB
CN19017	Cultivar	1	Oil	CANADA	CAN	North America	NA	16	5.8	GGTGAGAATGAGCGTCCACGTCCAACTGACATACCGGTCCTGGCGGCGGACTCCAGAAAGGGCATTC	BBBBBBAABBBBAABBBBBBABBBBBBBBBBBBBBBBBBABBBBABABABABBAAABBBBABAABBB
CN19157	Cultivar	1	Fibre	CANADA	CAN	North America	NA	18	6	AGTGAGGATGAGATTCGACGTCCAACTGTCATACCGGTCTTGGCGACGAATTTCAGAAAGGGCAAAG	ABBBBBBABBBBBBBBABBBABBBBBBBABBBBBBBBBBBBBBBAAABBBBBAAAABBBBABAAAAA
CN19159	Cultivar	1	Oil	CANADA	CAN	North America	NA	9	7.4	GGTGAGGATGAGATTCCACGCCCAATCGATATACCGGTCTTGGCAGTGGACTCCGCAAAACGGATTC	BBBBBBBABBBBBBBBBBBBBBBBBAABBABBBBBBBBBBBBBBBBBBABABBABBBBBABBBABBB
CN33385	Cultivar	1	Oil	CANADA	CAN	North America	NA	13	6.6	GGTGAGGGTGAGCGTCCACGTCCAACTGTCATACCGGTCCTGGCGGCGGACTCCAGAAAGCGGATTC	BBBBBBBBBBBBAABBBBBBABBBBBBBABBBBBBBBBBABBBBABABABABBAAABBBBBBBABBB
CN33386	Cultivar	1	Oil	CANADA	CAN	North America	NA	12	7.4	GGCGAGAATGAGATACGGCGCCCAACTGACATACCGGTCTTGGCAGTGGATTCCAGAAAGCGGATAC	BBABBBAABBBBBBABAABBBBBBBBBBBBBBBBBBBBBBBBBBBBBBABBBBAAABBBBBBBABAB
CN33388	Cultivar	1	Oil	CANADA	CAN	North America	NA	26	6	AGCGAGGATATGCGTCGGCGTCCAATCATCATACCGGTATTGGCGGCGAACTCCAGAAAGGACATAC	ABABBBBABAABAABBAABBABBBBAAAABBBBBBBBBABBBBBABABBBABBAAABBBBAAAABAB
CN33389	Cultivar	1	Oil	CANADA	CAN	North America	NA	21	6.6	AGTGAGGATATGCGTCGGCGTCCAATCGTCATACCGGTCTTCGCAGTGAATTCCAGAAAGGACATAC	ABBBBBBABAABAABBAABBABBBBAABABBBBBBBBBBBBABBBBBBBBBBBAAABBBBAAAABAB
CN33397	Cultivar	1	Oil	CANADA	CAN	North America	NA	21	6	AGCGACGATATGCGTCGGCGTCCAATCAACATACCGGTCTTGGCAGTGAACTCCACAAAGGACATTC	ABABBABABAABAABBAABBABBBBAAABBBBBBBBBBBBBBBBBBBBBBABBAABBBBBAAAABBB
CN37286	Cultivar	1	Oil	CANADA	CAN	North America	NA	22	5	AGCGAGGATATGCGTCCACGTCCAATCGTCATACCGGTCTTGGCGGCGGACTCCAGAAAGGACATTC	ABABBBBABAABAABBBBBBABBBBAABABBBBBBBBBBBBBBBABABABABBAAABBBBAAAABBB
CN52732	Cultivar	1	Oil	CANADA	CAN	North America	NA	14	5.6	GGCGAGGATGAGCGTCCACGTCCAACTGACATACCGGTCTTGGCGGCGGACTCCACAAGGCGCATTC	BBABBBBABBBBAABBBBBBABBBBBBBBBBBBBBBBBBBBBBBABABABABBAABBBABBBAABBB
CN97392	Cultivar	1	Oil	CANADA	CAN	North America	NA	10	8	GGCGAGGATGAGAGTCCACACCCAACTGACATACCGGTCTTGGCAGTGAACTCCACACGGCGGATTC	BBABBBBABBBBBABBBBBABBBBBBBBBBBBBBBBBBBBBBBBBBBBBBABBAABBAABBBBABBB
CN97571	Cultivar	1	Oil	CANADA	CAN	North America	NA	16	7.4	GGCGACGATAAGCGTCCACGTCCAACTGATATACCGGTCTTCGCAGTGGACTCCACAAGGCGGATTG	BBABBABABABBAABBBBBBABBBBBBBBABBBBBBBBBBBABBBBBBABABBAABBBABBBBABBA
CN97633	Cultivar	1	Oil	CANADA	CAN	North America	NA	13	6.6	GGCGAGGATGTGCGTCCACGTCCAACTGATATACCGGTCTTGGCAGTGAACTCCGGAAGGCGCGTAC	BBABBBBABBABAABBBBBBABBBBBBBBABBBBBBBBBBBBBBBBBBBBABBABABBABBBABBAB
CN97671	Cultivar	1	Oil	CANADA	CAN	North America	NA	13	7.6	GGCGAGGATGAGCGTCGACGCCCAATCGACATACCGGTCTTGGCGGTGAATTTCGCACGGCGCGTTC	BBABBBBABBBBAABBABBBBBBBBAABBBBBBBBBBBBBBBBBABBBBBBBAABBBAABBBABBBB
Linola989	Cultivar	1	Oil	CANADA	CAN	North America	NA	23	4.8	AGCACGGATATGCGTCCACGTCCAATCGACATACCGGTCTTGGCAGTGGACTCCAGAAAGGACATAG	ABAAABBABAABAABBBBBBABBBBAABBBBBBBBBBBBBBBBBBBBBABABBAAABBBBAAAABAA
PrairieBlue	Cultivar	1	Oil	CANADA	CAN	North America	NA	21	5.8	GGCGACAATATGCGTCCACGTCCAATCAACATACCGGTCTTGGCGGCGAACTCCACAAAGGACATTC	BBABBAAABAABAABBBBBBABBBBAAABBBBBBBBBBBBBBBBABABBBABBAABBBBBAAAABBB
PrairieGrande	Cultivar	1	Oil	CANADA	CAN	North America	NA	14	7	GGCGAGGATAAGCGTCGACGTCCAACTGACATACCGGTCTTGGCAGTGAACTCCACAAGGCACATTC	BBABBBBABABBAABBABBBABBBBBBBBBBBBBBBBBBBBBBBBBBBBBABBAABBBABBAAABBB
PrairieThunder	Cultivar	1	Oil	CANADA	CAN	North America	NA	15	5.4	GGCGAGGATGAGCGTCCACGTCCAATCAACATACCGGTCTTGGCGGTGGACTCCACAAAGCGCATTC	BBABBBBABBBBAABBBBBBABBBBAAABBBBBBBBBBBBBBBBABBBABABBAABBBBBBBAABBB
Shape	Cultivar	1	Oil	CANADA	CAN	North America	NA	19	6.8	GGCGAGGGTGAGCGTCCACGTCCAATCATCATATCGGCCTTGGCGGCAAACTCCACAAAGCACATTC	BBABBBBBBBBBAABBBBBBABBBBAAAABBBBABBBABBBBBBABAABBABBAABBBBBBAAABBB
CN100884	Cultivar	1	Oil	Czechoslovakia	CSK	Central and Eastern Europe	CEE	14	6.4	GGCGAGGATGATATTGGACGCCCAATCGACATACCGGTCTTCGCAGTGGACTCCGCAAAGGGCGTAC	BBABBBBABBBABBBAABBBBBBBBAABBBBBBBBBBBBBBABBBBBBABABBABBBBBBABABBAB
CN100838	Unknown	1	Oil	CYPRUS	CYP	Western Aisa	WA	18	5.6	GGCGAGGATATGCGACCGCGTCCAACTGATATGCCGGTCTTGGCAGTGGACTCAACAAGGCGCGTAG	BBABBBBABAABAAABBABBABBBBBBBBABBABBBBBBBBBBBBBBBABABBBABBBABBBABBAA
CN100805	Cultivar	1	Oil	CZECH REPUBLIC	CZE	Central and Eastern Europe	CEE	11	6.2	AGCGAGGGTGAGCGTCCACATCCAACTAACTCACCGGTCTTGGCAGTGGATTCCGCAAAGCGGGTTC	ABABBBBBBBBBAABBBBBAABBBBBBABBAABBBBBBBBBBBBBBBBABBBBABBBBBBBBBBBBB
CN100851	Cultivar	1	Oil	CZECH REPUBLIC	CZE	Central and Eastern Europe	CEE	18	6.4	GGCGAGGACGAGCGTGCGCGCCCAATCAACATACCGGTCTTCGCAGTGGACTCCACAAAGGGCATTC	BBABBBBAABBBAABABABBBBBBBAAABBBBBBBBBBBBBABBBBBBABABBAABBBBBABAABBB
CN97430	Breeding line	1	Oil	GERMANY	DEU	Western Europe	WE	12	7.6	GACGAGGATGTGCGTCCACGTCCAACTGACATACCGGTCTTGGCAGTGAATTCCAGAAGGCGCGTTC	BAABBBBABBABAABBBBBBABBBBBBBBBBBBBBBBBBBBBBBBBBBBBBBBAAABBABBBABBBB
CN97430B	Breeding line	1	Oil	GERMANY	DEU	Western Europe	WE	13	7.8	GGCGAGGATATGCGTCCACGTCCAACTGACATACCGGTCTTGGCAGTGAACTCCACAAGGCGCGTAC	BBABBBBABAABAABBBBBBABBBBBBBBBBBBBBBBBBBBBBBBBBBBBABBAABBBABBBABBAB
CN100881	Cultivar	1	Oil	GERMANY	DEU	Western Europe	WE	9	7.2	GGTGACGATGAGATACCACGCCCAATCGACATACCGGTCTTGGCAGTGAACTCAGGAAAGCGCATTC	BBBBBABABBBBBBABBBBBBBBBBAABBBBBBBBBBBBBBBBBBBBBBBABBBBABBBBBBAABBB
CN97886	Cultivar	1	Oil	GERMANY	DEU	Western Europe	WE	12	7	GGCGACGATAAGCGTCCACGTCCAACTGACATACCGGTCTTGGCAGTGAACTCCACAAGGCGGATTC	BBABBABABABBAABBBBBBABBBBBBBBBBBBBBBBBBBBBBBBBBBBBABBAABBBABBBBABBB
CN98475	Cultivar	1	Oil	GERMANY	DEU	Western Europe	WE	14	6.4	GGCGAGGGTGAGCGACCACGTCCGACTGACATACGGGTCTTGGCAGTGAACTCCACACGGCGCATTC	BBABBBBBBBBBAAABBBBBABBABBBBBBBBBBABBBBBBBBBBBBBBBABBAABBAABBBAABBB
CN101329	Unknown	1	Oil	EGYPT	EGY	Africa	AF	15	7.2	AGCGAGGACATTCGTCCACGTCCAACTGACATACGGGTCTTGGCAGTGAACTCCACAAGGCGGGTTC	ABABBBBAAAAAAABBBBBBABBBBBBBBBBBBBABBBBBBBBBBBBBBBABBAABBBABBBBBBBB
CN19007	Breeding line	1	Oil	ETHIOPIA	ETH	Africa	AF	18	5	GGCGAGGATATTCGTGCACGCCCAATCAACATACCGGTCTTGGCAGTAAACTCCAGAAGGCGGATTC	BBABBBBABAAAAABABBBBBBBBBAAABBBBBBBBBBBBBBBBBBBABBABBAAABBABBBBABBB
CN96988	Cultivar	1	Oil	ETHIOPIA	ETH	Africa	AF	18	6.4	GGCGAGGATGATCGTGGACGTCCAATCAATATACCAGTCTTGGCAGTGGACTCAGGAAGGCGCGTTC	BBABBBBABBBAAABAABBBABBBBAAABABBBBBABBBBBBBBBBBBABABBBBABBABBBABBBB
CN96991	Cultivar	1	Oil	ETHIOPIA	ETH	Africa	AF	20	2.4	GGCGAGGATGATCGTGGACGTCCAACTATTATACCAGTCTTGGCAGTGGACTTCGGAAGGCGCATTC	BBABBBBABBBAAABAABBBABBBBBBAAABBBBBABBBBBBBBBBBBABABAABABBABBBAABBB
CN97004	Cultivar	1	Oil	ETHIOPIA	ETH	Africa	AF	22	2.4	GGCGAGGATGATCGTGGACGTCCAATCAATATACCAGTCTTGGCAGTGGACTTCGGAAGGCGCATAC	BBABBBBABBBAAABAABBBABBBBAAABABBBBBABBBBBBBBBBBBABABAABABBABBBAABAB
CN100863	Breeding line	1	Oil	FRANCE	FRA	Western Europe	WE	13	7	GGCGAGGATGAGCGTCGACGTCCAACTGACATACCGGTCTTGGCGGTGGACTCCGCAAGGCACGTTC	BBABBBBABBBBAABBABBBABBBBBBBBBBBBBBBBBBBBBBBABBBABABBABBBBABBAABBBB
CN98741	Breeding line	1	Oil	FRANCE	FRA	Western Europe	WE	6	8.5	GGTGAGGATGAGCTTCCACGCCCAACTGACATACCAGTCTTGGCAGTGAACTCCGCAAGGCGGGTTC	BBBBBBBABBBBABBBBBBBBBBBBBBBBBBBBBBABBBBBBBBBBBBBBABBABBBBABBBBBBBB
CN98806	Breeding line	1	Oil	FRANCE	FRA	Western Europe	WE	11	7.2	AATGAGGATGAGATACGACGCCCAACTAACATACCGGTCTTGGCAGTGGACTCCGCAAGGCGCGTTC	AABBBBBABBBBBBABABBBBBBBBBBABBBBBBBBBBBBBBBBBBBBABABBABBBBABBBABBBB
CN100928	Cultivar	1	Oil	FRANCE	FRA	Western Europe	WE	13	7.8	GGCGAGGATGAGCGACGACGTCCAACTGACATGCCGGTCTTGGCAGTGAACTCAGGAAAGCGCATTG	BBABBBBABBBBAAABABBBABBBBBBBBBBBABBBBBBBBBBBBBBBBBABBBBABBBBBBAABBA
CN18989	Cultivar	1	Oil	FRANCE	FRA	Western Europe	WE	19	5.8	AGCGAGGATATGCGTCGACGTCCAACTGTCATACCGGTCTTGGCAGCGAACTCCACAAGGCACATAC	ABABBBBABAABAABBABBBABBBBBBBABBBBBBBBBBBBBBBBBABBBABBAABBBABBAAABAB
CN97350	Cultivar	1	Oil	FRANCE	FRA	Western Europe	WE	12	7.4	GGTGAGGATGAGCGTGGACGCCCAACCATTATACCGGTCTTGGCAGTGAATTCAGGAAGGCGGATTC	BBBBBBBABBBBAABAABBBBBBBBBAAAABBBBBBBBBBBBBBBBBBBBBBBBBABBABBBBABBB
CN98712	Cultivar	1	Oil	FRANCE	FRA	Western Europe	WE	12	6.8	GGCGAGGATGATCGTCCACGTCCAACTGACATACCGGTCTTGGCAGTGAACTCCACAAGGCGGATTG	BBABBBBABBBAAABBBBBBABBBBBBBBBBBBBBBBBBBBBBBBBBBBBABBAABBBABBBBABBA
CN98734	Cultivar	1	Oil	FRANCE	FRA	Western Europe	WE	7	7.8	GGTGAGGATGATCGTCCACGCCCAACTGACATACCAGTCTTGGCAGTGAATTCCGCAAGGCGGGTTC	BBBBBBBABBBAAABBBBBBBBBBBBBBBBBBBBBABBBBBBBBBBBBBBBBBABBBBABBBBBBBB
CN98752	Cultivar	1	Oil	FRANCE	FRA	Western Europe	WE	13	5.6	GGCGACGATAAGCGTCCACGTCCAACTGACATACCGGTCTTGGCAGCGAACTCCACAAGGCGGATTC	BBABBABABABBAABBBBBBABBBBBBBBBBBBBBBBBBBBBBBBBABBBABBAABBBABBBBABBB
CN98753	Cultivar	1	Oil	FRANCE	FRA	Western Europe	WE	15	7.6	GGCGAGGATGATCGACCACGCCCAATCGACATACCGGTCTTGGCAGTGAACTCCAGGAAGCGCGTAC	BBABBBBABBBAAAABBBBBBBBBBAABBBBBBBBBBBBBBBBBBBBBBBABBAAAABBBBBABBAB
CN98767	Cultivar	1	Oil	FRANCE	FRA	Western Europe	WE	13	7.2	GGCGAGGGTGAGCGACCGCGTCCAACTGACATGCCGATCTTGGCAGTGAATTCAGGAAAGGGCATTG	BBABBBBBBBBBAAABBABBABBBBBBBBBBBABBBABBBBBBBBBBBBBBBBBBABBBBABAABBA
CN98773	Cultivar	1	Oil	FRANCE	FRA	Western Europe	WE	17	5.4	GACGAGGATAAGCGAGCACGCCCGATCGATATACGGGTCTTGGCAGTGAATTCCAGAAGGCGGGTTC	BAABBBBABABBAAAABBBBBBBABAABBABBBBABBBBBBBBBBBBBBBBBBAAABBABBBBBBBB
CN98794	Cultivar	1	Oil	FRANCE	FRA	Western Europe	WE	13	8	GGCGACGATAAGCGTCCACGTCCAACTGACATACCGGTCTTGGCAGCGAACTCCACAAGGCGGATTC	BBABBABABABBAABBBBBBABBBBBBBBBBBBBBBBBBBBBBBBBABBBABBAABBBABBBBABBB
CN98807	Cultivar	1	Oil	FRANCE	FRA	Western Europe	WE	17	7.2	GGCGAGGATGAGCGTCCACGTCCAATCGATATACCGGTCTTGGCAGTGGACTTCGGAAGGCACGTTG	BBABBBBABBBBAABBBBBBABBBBAABBABBBBBBBBBBBBBBBBBBABABAABABBABBAABBBA
CN101265	Cultivar	1	Oil	Great Britain	GBR	Northern Europe	NE	14	6.6	GATGAGGATGAGCGTCGACGTCCAATCAACATACGGGTCTTGGCAGTGAATTCCGCAAGGGGCGTTC	BABBBBBABBBBAABBABBBABBBBAAABBBBBBABBBBBBBBBBBBBBBBBBABBBBABABABBBB
CN101366	Unknown	1	Oil	GEORGIA	GEO	Western Aisa	WA	6	7.8	GGTGAGGGTGAGATTCCACGCCCAACTAACATACCGGTCTTGGCGGTGGATTTCACAAAGCGGGTTC	BBBBBBBBBBBBBBBBBBBBBBBBBBBABBBBBBBBBBBBBBBBABBBABBBAAABBBBBBBBBBBB
CN101325	Unknown	1	Oil	GREECE	GRC	Southern Europe	SE	12	7	AGTGAGGATGAGCGTCCACGCCCAACTGACATACCGGTCTTGGCAGTGAACTCCAGAAGGGGCATTC	ABBBBBBABBBBAABBBBBBBBBBBBBBBBBBBBBBBBBBBBBBBBBBBBABBAAABBABABAABBB
CN100883	Cultivar	1	Oil	HUNGARY	HUN	Central and Eastern Europe	CEE	9	7	GGTGAGGATAAGAGTCCACGCCCAATTGACTTACCGGTCTTGGCAGTGAACTCAACAAGGCGCGTTC	BBBBBBBABABBBABBBBBBBBBBBABBBBABBBBBBBBBBBBBBBBBBBABBBABBBABBBABBBB
CN97238	Cultivar	1	Oil	HUNGARY	HUN	Central and Eastern Europe	CEE	8	7.6	GGCGAGGGTGAGCGTCCACGCCCAACTGATATACCGATCTTGGCAGTGAACTCCGGAAAGCGGGTTC	BBABBBBBBBBBAABBBBBBBBBBBBBBBABBBBBBABBBBBBBBBBBBBABBABABBBBBBBBBBB
CN97287	Cultivar	1	Oil	HUNGARY	HUN	Central and Eastern Europe	CEE	12	7.2	GGCGAGGATGAGCGTCCGCGTCCAACTAACATACCAGTCTTGGCAGTGAACTCCACAAGGCGGGTTC	BBABBBBABBBBAABBBABBABBBBBBABBBBBBBABBBBBBBBBBBBBBABBAABBBABBBBBBBB
CN97300	Cultivar	1	Oil	HUNGARY	HUN	Central and Eastern Europe	CEE	15	7.2	GGCGAGGATATGCGTCCACGCCCAATCGACATACCGGTCTTGGCAGTGGACTCCACAAAGGGCATTC	BBABBBBABAABAABBBBBBBBBBBAABBBBBBBBBBBBBBBBBBBBBABABBAABBBBBABAABBB
CN98275	Cultivar	1	Oil	HUNGARY	HUN	Central and Eastern Europe	CEE	11	7	GGCGAGGATAATCGTCCACGCCCAACTGACATACCGGTCTTGGCAGTGAATTCAGCGAAGCGCATAG	BBABBBBABABAAABBBBBBBBBBBBBBBBBBBBBBBBBBBBBBBBBBBBBBBBBBABBBBBAABAA
CN98276	Cultivar	1	Oil	HUNGARY	HUN	Central and Eastern Europe	CEE	15	6.2	GACGAGGATAATCGACGACGCCCAACTGACATACCGATATTGGCAGTGAATTCAGCAAAGCGCATAG	BAABBBBABABAAAABABBBBBBBBBBBBBBBBBBBABABBBBBBBBBBBBBBBBBBBBBBBAABAA
CN98278	Cultivar	1	Oil	HUNGARY	HUN	Central and Eastern Europe	CEE	15	6.4	GGCGACGATAAGCGTCCACGTCCAACTGATATACCGGTCTTGGCAGCGAACTCCACAAGGCGGATAC	BBABBABABABBAABBBBBBABBBBBBBBABBBBBBBBBBBBBBBBABBBABBAABBBABBBBABAB
CN101208	Cultivar	1	Oil	INDIA	IND	Southern Aisa	SAS	14	6.4	GATGAGGATGAGCGACCACGTCCAATCAACATACCGGTCTTCGCAGTGAATTTCGCAAGGCGGATTC	BABBBBBABBBBAAABBBBBABBBBAAABBBBBBBBBBBBBABBBBBBBBBBAABBBBABBBBABBB
CN97306	Cultivar	1	Oil	INDIA	IND	Southern Aisa	SAS	14	5.4	GGCGAGGATAAGCGTCCACGTCCAACTAACATACCGGTCTTCGCAGTGAATTCCGGAAAGGGCATTG	BBABBBBABABBAABBBBBBABBBBBBABBBBBBBBBBBBBABBBBBBBBBBBABABBBBABAABBA
CN97307	Cultivar	1	Oil	INDIA	IND	Southern Aisa	SAS	12	6.2	GGCGAGGATAAGCGTCCACGTCCAACTGACATACCGGTCTTCGCAGTGAACTCCACAAGGCGGATTC	BBABBBBABABBAABBBBBBABBBBBBBBBBBBBBBBBBBBABBBBBBBBABBAABBBABBBBABBB
CN97312	Cultivar	1	Oil	INDIA	IND	Southern Aisa	SAS	15	7	GACGAGGATGATATTCCGCGTCCAATCAATATACCGGTCTTGGCAGTGAACTCAGGAAAGGGCGTTG	BAABBBBABBBABBBBBABBABBBBAAABABBBBBBBBBBBBBBBBBBBBABBBBABBBBABABBBA
CN98157	Cultivar	1	Oil	INDIA	IND	Southern Aisa	SAS	14	7.2	GGCGAGGATAAGCGTCCACGTCCAACTAACATACCGGTCTTCGCAGTGAATTTCGGAAAGGGCGTAC	BBABBBBABABBAABBBBBBABBBBBBABBBBBBBBBBBBBABBBBBBBBBBAABABBBBABABBAB
CN98250	Cultivar	1	Oil	INDIA	IND	Southern Aisa	SAS	14	7	GGCGAGGATAATCGTCCACGTCCAACTGACATACCGGTCTTCGCAGTGAACTCCACAAGGCGGATAC	BBABBBBABABAAABBBBBBABBBBBBBBBBBBBBBBBBBBABBBBBBBBABBAABBBABBBBABAB
CN98363	Cultivar	1	Oil	INDIA	IND	Southern Aisa	SAS	15	6	GGCGACGATGATCGTCCACGTCCAACTGACATACCGGTCTTCGCAGCGAACTCCACAAGGCGCATTC	BBABBABABBBAAABBBBBBABBBBBBBBBBBBBBBBBBBBABBBBABBBABBAABBBABBBAABBB
CN98397	Cultivar	1	Oil	INDIA	IND	Southern Aisa	SAS	12	6.8	GGCGAGGATAAGCGTCCACGTCCAACTGACATACCGGTCTTGGCAGCGAACTCCACAAGGCGGATTC	BBABBBBABABBAABBBBBBABBBBBBBBBBBBBBBBBBBBBBBBBABBBABBAABBBABBBBABBB
CN98398	Cultivar	1	Oil	INDIA	IND	Southern Aisa	SAS	13	6.8	GGCGACGATAAGCGTCCACGTCCAACTGACATACCGGTCTTGGCAGCGAACTCCACAAGGCGGATTC	BBABBABABABBAABBBBBBABBBBBBBBBBBBBBBBBBBBBBBBBABBBABBAABBBABBBBABBB
CN98961	Cultivar	1	Oil	INDIA	IND	Southern Aisa	SAS	13	6.6	GGCGACGATGAGCGTCCACGTCCAACTGACATACCGGTCTTGGCAGCGAACTCCACAAGGCGCATTC	BBABBABABBBBAABBBBBBABBBBBBBBBBBBBBBBBBBBBBBBBABBBABBAABBBABBBAABBB
CN98974	Cultivar	1	Oil	INDIA	IND	Southern Aisa	SAS	14	6.6	GGCGACGATAAGCGTCCACGTCCAACTGACATACCGGTCTTGGCAGCGAACTCCACAAGGCGCATTC	BBABBABABABBAABBBBBBABBBBBBBBBBBBBBBBBBBBBBBBBABBBABBAABBBABBBAABBB
CN98982	Cultivar	1	Oil	INDIA	IND	Southern Aisa	SAS	16	7.2	GGTGAGGACATGCGTCCACGTCCAACTGTTATACCGGTCTTGGCAGCGAATTTCGGAAAGGGCGTTG	BBBBBBBAAAABAABBBBBBABBBBBBBAABBBBBBBBBBBBBBBBABBBBBAABABBBBABABBBA
CN96974	Landrace	1	Oil	INDIA	IND	Southern Aisa	SAS	11	6.6	GGCGAGGATATGCGTCCACGCCCAACTGACATACCGGTCTTGGCAGTGGATTCCGCAAAGCGCATAC	BBABBBBABAABAABBBBBBBBBBBBBBBBBBBBBBBBBBBBBBBBBBABBBBABBBBBBBBAABAB
CN98240	Landrace	1	Oil	INDIA	IND	Southern Aisa	SAS	13	5.3	GGCGACGATAAGCGTCCACGTCCAACTGACATACCGGTCTTGGCAGCGAACTCCACAAGGCGGATTC	BBABBABABABBAABBBBBBABBBBBBBBBBBBBBBBBBBBBBBBBABBBABBAABBBABBBBABBB
CN101310	Unknown	1	Oil	INDIA	IND	Southern Aisa	SAS	10	7.4	GGTGAGGATGAGATTCGACGTCCAACTAACTCACCGGTCTTGGCAGTGGACTTCGCAAAGCGGGTTC	BBBBBBBABBBBBBBBABBBABBBBBBABBAABBBBBBBBBBBBBBBBABABAABBBBBBBBBBBBB
CN98569	Unknown	1	Oil	INDIA	IND	Southern Aisa	SAS	12	6.4	GGCGACGATAAGCGTCCACGTCCAACTGACATACCGGTCTTGGCAGTGAACTCCACAAGGCGGATTC	BBABBABABABBAABBBBBBABBBBBBBBBBBBBBBBBBBBBBBBBBBBBABBAABBBABBBBABBB
CN98192	Cultivar	1	Oil	IRELAND	IRL	Northern Europe	NE	17	5.4	GGCGAGGATGAGCGTCCATGCCCAATCGACATACCGATCTAGGCAGTGGACTCAGGAAGGCGCAATG	BBABBBBABBBBAABBBBABBBBBBAABBBBBBBBBABBBABBBBBBBABABBBBABBABBBAAABA
CN97050	Cultivar	1	Oil	IRAN	IRN	Southern Aisa	SAS	14	7	GGCGAGGATGATCGTCCACGTCCAACTGACATACCGGTCTTCGCAGTGATCTCCACAAGGCGCGTAC	BBABBBBABBBAAABBBBBBABBBBBBBBBBBBBBBBBBBBABBBBBBBAABBAABBBABBBABBAB
CN98165	Cultivar	1	Oil	IRAN	IRN	Southern Aisa	SAS	11	7.8	GGCGACGGTAAGCGTCCACGTCCAACTGACATACCGGTCTTGGCAGCGAACTCAACAAGGCGGATTC	BBABBABBBABBAABBBBBBABBBBBBBBBBBBBBBBBBBBBBBBBABBBABBBABBBABBBBABBB
CN97129	Landrace	1	Oil	IRAN	IRN	Southern Aisa	SAS	10	6.2	GGTGAGGATGAGATACCGCGTCCAACTAATATACCGGTCTTGGCAGCGAACTCCGCAAAGCGGGTTG	BBBBBBBABBBBBBABBABBABBBBBBABABBBBBBBBBBBBBBBBABBBABBABBBBBBBBBBBBA
CN97129B	Landrace	1	Oil	IRAN	IRN	Southern Aisa	SAS	14	4.8	GGCGAGGATAAGCGTCCGCGTCCAACTGATATACCGGTCTTGGCAGCGAACTCCACAAGGCGGGTTG	BBABBBBABABBAABBBABBABBBBBBBBABBBBBBBBBBBBBBBBABBBABBAABBBABBBBBBBA
CN97470	Cultivar	1	Fibre	JAPAN	JPN	Eastern Aisa	EA	17	6.6	AGCGAGGATGAGCGTCGGCATCCAACTGACATACCGGTCTTGGCAGCGGACTTCAGAAAGCGCGTTC	ABABBBBABBBBAABBAABAABBBBBBBBBBBBBBBBBBBBBBBBBABABABAAAABBBBBBABBBB
CN101240	Breeding line	1	Fibre	LITHUANIA	LTU	Northern Europe	NE	19	6.4	AGCGAGGATGAGCGTCGACGTCCAACTAACATACGGGTCTACGCAGTGGACTCCAGAAGGCGCGTTG	ABABBBBABBBBAABBABBBABBBBBBABBBBBBABBBBBAABBBBBBABABBAAABBABBBABBBA
CN101026	Breeding line	1	Oil	MOROCCO	MAR	Africa	AF	17	5.4	GGTGAGGATATGCGACCGCGTCCAACTAATACACGGGTCTTGGCAGTGATTTCCAGAAGGCGGGTTC	BBBBBBBABAABAAABBABBABBBBBBABABABBABBBBBBBBBBBBBBABBBAAABBABBBBBBBB
CN18993	Cultivar	1	Oil	NETHERLANDS	NLD	Western Europe	WE	15	6	GGTGACGATATTCGTCCACGTCCAACTGACATACCGGTCTTGGCAGTGAACACCACAAGGCGCGTAC	BBBBBABABAAAAABBBBBBABBBBBBBBBBBBBBBBBBBBBBBBBBBBBAABAABBBABBBABBAB
CN97458	Cultivar	1	Oil	NETHERLANDS	NLD	Western Europe	WE	14	7.4	GGCGAGGATATGCGACGGCGCCCAACTGACATACCGGTCTTGGCGACGAATTCAGCAAAGCGCGTAC	BBABBBBABAABAAABAABBBBBBBBBBBBBBBBBBBBBBBBBBAAABBBBBBBBBBBBBBBABBAB
CN97613	Cultivar	1	Oil	NETHERLANDS	NLD	Western Europe	WE	16	6.4	GGCGAGGATGATCGTGGGCGTCCAACTGACATACCGGTCTTGGCAATGAACTCCAGAAGGCGCGTTC	BBABBBBABBBAAABAAABBABBBBBBBBBBBBBBBBBBBBBBBBABBBBABBAAABBABBBABBBB
CN98056	Cultivar	1	Fibre	NETHERLANDS	NLD	Western Europe	WE	14	3.8	GGCGACGATAAGCGTCCACGTCCAACTGTCATACCGGTCTTGGCAGCGAACTCCACAAGGCGGATTC	BBABBABABABBAABBBBBBABBBBBBBABBBBBBBBBBBBBBBBBABBBABBAABBBABBBBABBB
CN97056	Cultivar	1	Oil	PAKISTAN	PAK	Southern Aisa	SAS	11	7	GGTGAGGATGATCGTCCACGTCCAACTGACATACCGGTCTTGGCAGCGATCTCCACAAGGCGGGTTC	BBBBBBBABBBAAABBBBBBABBBBBBBBBBBBBBBBBBBBBBBBBABBAABBAABBBABBBBBBBB
CN97103	Cultivar	1	Oil	PAKISTAN	PAK	Southern Aisa	SAS	19	5	GGCGAGGATGATCGTCGGCGTCCAACTGTTATACCAGTCTTCGCAGTGAACTTCGGAAGGCGCATTC	BBABBBBABBBAAABBAABBABBBBBBBAABBBBBABBBBBABBBBBBBBABAABABBABBBAABBB
CN98733	Breeding line	1	Oil	POLAND	POL	Central and Eastern Europe	CEE	7	7.5	GGTGAGGATGAGCT0GCACGCCCGACTGATATACCAGTCTTGGCAGTGAATTCAGCAAGGCGGGTTC	BBBBBBBABBBBAB0ABBBBBBBABBBBBABBBBBABBBBBBBBBBBBBBBBBBBBBBABBBBBBBB
CN100674	Cultivar	1	Oil	ROMANIA	ROM	Central and Eastern Europe	CEE	17	6.2	GGCGAGGATGAGCGTGCGCGTCCAATCAACATACGAGTCTAGGCAGTGAATTCCACAAGGCGCGTTC	BBABBBBABBBBAABABABBABBBBAAABBBBBBAABBBBABBBBBBBBBBBBAABBBABBBABBBB
CN97321	Cultivar	1	Oil	ROMANIA	ROM	Central and Eastern Europe	CEE	12	7.4	GGTGAGGATGAGCGTGCACGCCCAATCAACATACCGGTCCTGGCAGTGAATTCCGCAAGGGGCGTTC	BBBBBBBABBBBAABABBBBBBBBBAAABBBBBBBBBBBABBBBBBBBBBBBBABBBBABABABBBB
CN101132	Breeding line	1	Oil	RUSSIAN FEDERATION	RUS	Central and Eastern Europe	CEE	11	7.4	GGTGAGGGTGAGATTCCGCGTCCAACTGACATACCGGTCTTGGCAGTGAATTCCACACGGGGCAAAC	BBBBBBBBBBBBBBBBBABBABBBBBBBBBBBBBBBBBBBBBBBBBBBBBBBBAABBAABABAAAAB
CN101137	Breeding line	1	Oil	RUSSIAN FEDERATION	RUS	Central and Eastern Europe	CEE	12	6.4	GGTGAGGATAAGCGTCCACGTCCAACTGACATACGGGTCTTGGCAGTGGACTCCGGAAGGCGCGTTC	BBBBBBBABABBAABBBBBBABBBBBBBBBBBBBABBBBBBBBBBBBBABABBABABBABBBABBBB
CN101279	Breeding line	1	Oil	RUSSIAN FEDERATION	RUS	Central and Eastern Europe	CEE	7	7.2	GGTGAGGGTGAGATACGGCGTCCAATCGACATACCGGTCTTGGCAGTGAATTCAGGAAAGCGGGTTC	BBBBBBBBBBBBBBABAABBABBBBAABBBBBBBBBBBBBBBBBBBBBBBBBBBBABBBBBBBBBBB
CN101307	Breeding line	1	Oil	RUSSIAN FEDERATION	RUS	Central and Eastern Europe	CEE	15	7	GGTGAGAATATGATTCGGCGTCCAACTGACATACGGGTCTTGGCAGCGGACTCCGCACGGCGCGTTC	BBBBBBAABAABBBBBAABBABBBBBBBBBBBBBABBBBBBBBBBBABABABBABBBAABBBABBBB
CN96845	Cultivar	1	Oil	RUSSIAN FEDERATION	RUS	Central and Eastern Europe	CEE	19	5.6	GGCGAGGATGATCGTGGACGCCCAATCAATATACCAGTCTTGGCAGTGGACTCCGGAAGGCGCATTC	BBABBBBABBBAAABAABBBBBBBBAAABABBBBBABBBBBBBBBBBBABABBABABBABBBAABBB
CN96846	Cultivar	1	Oil	RUSSIAN FEDERATION	RUS	Central and Eastern Europe	CEE	13	6.8	GGCGACGATAAGCGTCCACGTCCAACTGACATACCGGTCTTGGCAGCGAACTCCACAAGGCGGATTC	BBABBABABABBAABBBBBBABBBBBBBBBBBBBBBBBBBBBBBBBABBBABBAABBBABBBBABBB
CN97475	Cultivar	1	Oil	RUSSIAN FEDERATION	RUS	Central and Eastern Europe	CEE	17	7	AGCGAGGATGAGCGTCGGCATCCAACTGACATACCGGTCTTGGCAGCGGACTTCAGAAAGCGCGTTC	ABABBBBABBBBAABBAABAABBBBBBBBBBBBBBBBBBBBBBBBBABABABAAAABBBBBBABBBB
CN97484	Cultivar	1	Oil	RUSSIAN FEDERATION	RUS	Central and Eastern Europe	CEE	13	7.6	GGCGACGATAAGCGTCCACGTCCAACTGACATACCGGTCTTGGCAGCGAACTCCACAAGGCGGATTC	BBABBABABABBAABBBBBBABBBBBBBBBBBBBBBBBBBBBBBBBABBBABBAABBBABBBBABBB
CN97487	Cultivar	1	Fibre	RUSSIAN FEDERATION	RUS	Central and Eastern Europe	CEE	12	7.2	AGTGAGGGTGAGCGTCGACGTCCAACTGACATACCGGTCTACACGGTGAATTCCGGAAAGCGCGTTC	ABBBBBBBBBBBAABBABBBABBBBBBBBBBBBBBBBBBBAAABABBBBBBBBABABBBBBBABBBB
CN97489	Cultivar	1	Fibre	RUSSIAN FEDERATION	RUS	Central and Eastern Europe	CEE	13	7.2	AGTGAGGATGAGCGTCGGCGTCCAACTGACATACCGGTCTTCGCGGTGAATTTCACAAAGCGCGTTC	ABBBBBBABBBBAABBAABBABBBBBBBBBBBBBBBBBBBBABBABBBBBBBAAABBBBBBBABBBB
CN97520	Cultivar	1	Oil	RUSSIAN FEDERATION	RUS	Central and Eastern Europe	CEE	16	5.6	AGCGAGGATAAGCGTCCGCGTCCAACTGTCATACCGGTCTTGGCAGTGGACTCCACAAGGCGCGTAC	ABABBBBABABBAABBBABBABBBBBBBABBBBBBBBBBBBBBBBBBBABABBAABBBABBBABBAB
CN97529	Cultivar	1	Oil	RUSSIAN FEDERATION	RUS	Central and Eastern Europe	CEE	16	6.6	AGCGAGGATGAGATTCCGCGTCCAACTGTCATACCGGTCTTGGCGGTGGACTCCAGAAGGCGCGAAC	ABABBBBABBBBBBBBBABBABBBBBBBABBBBBBBBBBBBBBBABBBABABBAAABBABBBABAAB
CN97604	Cultivar	1	Fibre	RUSSIAN FEDERATION	RUS	Central and Eastern Europe	CEE	12	7.6	AGTGAGGATGAGATTCGACGTCCAACTGTCATACCGGTCTTGGCAGCGAATTTCAGAAAGGGCGTTC	ABBBBBBABBBBBBBBABBBABBBBBBBABBBBBBBBBBBBBBBBBABBBBBAAAABBBBABABBBB
CN98505	Cultivar	1	Oil	RUSSIAN FEDERATION	RUS	Central and Eastern Europe	CEE	8	7.6	GGTGAGGGTGAGCTACCACGCCCAACTAACTCACCGGTCTTGGCAGTGATCTCAGGAAAGCGGGTTC	BBBBBBBBBBBBABABBBBBBBBBBBBABBAABBBBBBBBBBBBBBBBBAABBBBABBBBBBBBBBB
CN97605	Landrace	1	Oil	RUSSIAN FEDERATION	RUS	Central and Eastern Europe	CEE	13	4.6	GGCGACGATAAGCGTCCACGTCCAACTGACATACCGGTCTTGGCAGCGAACTCCACAAGGCGGATTC	BBABBABABABBAABBBBBBABBBBBBBBBBBBBBBBBBBBBBBBBABBBABBAABBBABBBBABBB
CN101375	Unknown	1	Oil	RUSSIAN FEDERATION	RUS	Central and Eastern Europe	CEE	20	7	GGCGAGGATGAGCGTGCGCGTCCAATCGACATATCGGTCTTGGCAGTGGACTCCACACGGGGCATAC	BBABBBBABBBBAABABABBABBBBAABBBBBBABBBBBBBBBBBBBBABABBAABBAABABAABAB
CN100827	Cultivar	1	Oil	SLOVENIA	SVN	Central and Eastern Europe	CEE	8	7.4	GGTGAGGATGAGCGTCCACGTCCGACTAACATACCGGTCTTGGCAGTGGACTCAGCAAAGCGGGTTC	BBBBBBBABBBBAABBBBBBABBABBBABBBBBBBBBBBBBBBBBBBBABABBBBBBBBBBBBBBBB
CN96911	Cultivar	1	Oil	TURKEY	TUR	Western Aisa	WA	5	7.6	GGTGAGGATAAGCTTCCACGCCCAACTAACATACCGGTCTTGGCAGTGGATTCAGCAAAGCGGGTTC	BBBBBBBABABBABBBBBBBBBBBBBBABBBBBBBBBBBBBBBBBBBBABBBBBBBBBBBBBBBBBB
CN96962	Cultivar	1	Oil	TURKEY	TUR	Western Aisa	WA	7	8.2	GGCGAGGGTAAGCTTCCACGCCCGACTAACATACCGGTCTTGGCAGTGAACTCAGCAAAGCGGATTC	BBABBBBBBABBABBBBBBBBBBABBBABBBBBBBBBBBBBBBBBBBBBBABBBBBBBBBBBBABBB
CN97147	Cultivar	1	Oil	TURKEY	TUR	Western Aisa	WA	7	8.2	GGTGAGGGTGAGCGTGCACGTCCAACTAACATACCGGTCTTGGCAGTGAATTCCGCAAAGCGGGTTG	BBBBBBBBBBBBAABABBBBABBBBBBABBBBBBBBBBBBBBBBBBBBBBBBBABBBBBBBBBBBBA
CN97153	Cultivar	1	Oil	TURKEY	TUR	Western Aisa	WA	7	8.4	GGTGAGGATAAGCTTCCACGCCCAACTGACATACCAGTCTTGGCAGTGGATTCAGCAAGGCGGATTC	BBBBBBBABABBABBBBBBBBBBBBBBBBBBBBBBABBBBBBBBBBBBABBBBBBBBBABBBBABBB
CN98869	Cultivar	1	Oil	TURKEY	TUR	Western Aisa	WA	7	8.4	GGTGAGGATGAGATTCGACGTCCAACTAATATACCGGTCTTGGCAGTGGACTCAGCAAAGCGGGTTC	BBBBBBBABBBBBBBBABBBABBBBBBABABBBBBBBBBBBBBBBBBBABABBBBBBBBBBBBBBBB
CN96958	Landrace	1	Oil	TURKEY	TUR	Western Aisa	WA	10	7	GGTGAGGATAAGAGTCCACGTCCAACTGACATACCGGTCTTGGCAGTGAACTCCACAAGGCGCGTAC	BBBBBBBABABBBABBBBBBABBBBBBBBBBBBBBBBBBBBBBBBBBBBBABBAABBBABBBABBAB
CN100837	Unknown	1	Oil	TURKEY	TUR	Western Aisa	WA	21	6	GGCGAGGACGAGCTACCACGCCCAACTGACATGCCGGTCTTCGCAGCAATCACCACGAGACGCGAAG	BBABBBBAABBBABABBBBBBBBBBBBBBBBBABBBBBBBBABBBBAABAAABAABABAABBABAAA
CN101331	Unknown	1	Oil	TURKEY	TUR	Western Aisa	WA	7	8.4	GGCGAGGATAAGCTTCCACGTCCAACTGACATACCGGTCTTGGCAGTGAATTCCGGAAAGCGGGTTC	BBABBBBABABBABBBBBBBABBBBBBBBBBBBBBBBBBBBBBBBBBBBBBBBABABBBBBBBBBBB
CN101332	Unknown	1	Oil	TURKEY	TUR	Western Aisa	WA	10	7.2	GGTGAGGATGATCGTCCGCGCCCAACTAACATACCGGTCTTGGCGGTGGACTCCGCAAAGCGGGTTC	BBBBBBBABBBAAABBBABBBBBBBBBABBBBBBBBBBBBBBBBABBBABABBABBBBBBBBBBBBB
CN30860	Cultivar	1	Oil	UKRAINE	UKR	Central and Eastern Europe	CEE	13	5.4	GGCGAGGATGAGATTCCACGTCCAACTAACATACGAGTCTTGGCAGTGAATTCCAGAAGGGGCATTC	BBABBBBABBBBBBBBBBBBABBBBBBABBBBBBAABBBBBBBBBBBBBBBBBAAABBABABAABBB
CN100547	Cultivar	1	Oil	UNITED KINGDOM	UNK	Northern Europe	NE	13	7.6	GGCGAGAGTGAGATACGGCGCCCAACTGACATACCGGTCTTCGCGGCGGATTCCAGAAAGCGGATTC	BBABBBABBBBBBBABAABBBBBBBBBBBBBBBBBBBBBBBABBABABABBBBAAABBBBBBBABBB
CN30861	Cultivar	1	Oil	UNITED KINGDOM	UNK	Northern Europe	NE	9	6.6	GGTGAGGATGAGATTCCACGTTCAACTAACATACCGGTCTTGGCAGTGAATTCCACAAGGGGCGTTC	BBBBBBBABBBBBBBBBBBBAABBBBBABBBBBBBBBBBBBBBBBBBBBBBBBAABBBABABABBBB
CN100841	Unknown	1	Oil	UNITED KINGDOM	UNK	Northern Europe	NE	11	5.4	AGCGAGGGTGAGCGTCCACATCCAACTAACTCACCGGTCTTGGCAGTGGATTCCGCAAAGCGGGTTC	ABABBBBBBBBBAABBBBBAABBBBBBABBAABBBBBBBBBBBBBBBBABBBBABBBBBBBBBBBBB
CN98100	Cultivar	1	Oil	URUGUAY	URY	South America	SA	11	7.4	GGCGAGGATATGCGTCCACGCCCAACTGACATACCGGTCTTGGCAGTGGATTCCGCAAAGCGCATAC	BBABBBBABAABAABBBBBBBBBBBBBBBBBBBBBBBBBBBBBBBBBBABBBBABBBBBBBBAABAB
CN100785	Breeding line	1	Oil	UNITED STATES	USA	North America	NA	18	6	GGTGAGGATGAGCGTCGGCATCCAATCGTCATACCGGTCTTGGCAGCGGATTCCACAAAGCACATAC	BBBBBBBABBBBAABBAABAABBBBAABABBBBBBBBBBBBBBBBBABABBBBAABBBBBBAAABAB
CN101286	Breeding line	1	Oil	UNITED STATES	USA	North America	NA	17	6.2	GGCGAGGATAAGCGTCGGCGCCCAATCATCATACCGGTCTTGGCGGTGGATTTCGCAAAGCGCATTC	BBABBBBABABBAABBAABBBBBBBAAAABBBBBBBBBBBBBBBABBBABBBAABBBBBBBBAABBB
CN97404	Breeding line	1	Oil	UNITED STATES	USA	North America	NA	14	6.2	AGCGAGGATAAGCGTCGGCGCCCAATTGTCATACCGGTCTTGGCAGTGAATTCCACAAGGCGGATTC	ABABBBBABABBAABBAABBBBBBBABBABBBBBBBBBBBBBBBBBBBBBBBBAABBBABBBBABBB
CN97404B	Breeding line	1	Oil	UNITED STATES	USA	North America	NA	14	6.6	AGCGAGGATGAGCGTCGACGTCCAATTGTCATACCGGTCTTGGCAGTGAACTCCACAAGGCGGATTC	ABABBBBABBBBAABBABBBABBBBABBABBBBBBBBBBBBBBBBBBBBBABBAABBBABBBBABBB
CN97679	Breeding line	1	Oil	UNITED STATES	USA	North America	NA	20	6	GGCGAGAATATGCGTCGGCGCCCAGCTGACATATCGGTCTTGGCGGTGGATTCCAGAAGGCGCATAC	BBABBBAABAABAABBAABBBBBBABBBBBBBBABBBBBBBBBBABBBABBBBAAABBABBBAABAB
CN97679B	Breeding line	1	Oil	UNITED STATES	USA	North America	NA	19	5.8	GGCGAGAATATGCGTCGGCGCCCAGCTGACATATCGGTCTTGGCGGTGGATTCCAGAAAGCGCATAC	BBABBBAABAABAABBAABBBBBBABBBBBBBBABBBBBBBBBBABBBABBBBAAABBBBBBAABAB
CN98566	Breeding line	1	Oil	UNITED STATES	USA	North America	NA	11	7.2	GGCGACGATAAGAGTCCACGTCCAACTGACATACCGGTCTTGGCAGTGAACTCCACAAGGCGGATTC	BBABBABABABBBABBBBBBABBBBBBBBBBBBBBBBBBBBBBBBBBBBBABBAABBBABBBBABBB
CN98566B	Breeding line	1	Oil	UNITED STATES	USA	North America	NA	15	7	GACGAGGATAAGATAGCACGTCCAACTAATATACCGATCTTGGCAGTGAATTCCGGAAAGGGCGTAC	BAABBBBABABBBBAABBBBABBBBBBABABBBBBBABBBBBBBBBBBBBBBBABABBBBABABBAB
CN98566C	Breeding line	1	Oil	UNITED STATES	USA	North America	NA	16	7	GACGAGGATGATATAGCACGTCCAATCAATATACCGGTCTTGGCAGTGAATTCCGGAAAGGGCGTAC	BAABBBBABBBABBAABBBBABBBBAAABABBBBBBBBBBBBBBBBBBBBBBBABABBBBABABBAB
CN18994	Cultivar	1	Oil	UNITED STATES	USA	North America	NA	17	6	GGTGACGATATGCGTCGGCGTCCAACTGTCATATCGGCCCTGGCAGTGGATTCCACAAAGCGGATTC	BBBBBABABAABAABBAABBABBBBBBBABBBBABBBABABBBBBBBBABBBBAABBBBBBBBABBB
CN19160	Cultivar	1	Oil	UNITED STATES	USA	North America	NA	11	6.2	GGCGAGGATAAGCGTCCACGCCCAACTGACATACCGGTCTTGGCAGTGAATTCCAGAAAGCGCATAC	BBABBBBABABBAABBBBBBBBBBBBBBBBBBBBBBBBBBBBBBBBBBBBBBBAAABBBBBBAABAB
CN33399	Cultivar	1	Oil	UNITED STATES	USA	North America	NA	24	5.8	AGCGAGGATGAGCGTCGGCATCCAATCATCATATCGGCCCTGGCAGTGAATTCCAGAAGGGACATTC	ABABBBBABBBBAABBAABAABBBBAAAABBBBABBBABABBBBBBBBBBBBBAAABBABAAAABBB
CN33400	Cultivar	1	Oil	UNITED STATES	USA	North America	NA	25	5.8	AGCGAGGATATGCGACGACGTTCAATCAACATACCGGTATTGGCGGCGAACTCCAGAAAGGGCATAC	ABABBBBABAABAAABABBBAABBBAAABBBBBBBBBBABBBBBABABBBABBAAABBBBABAABAB
CN33992	Cultivar	1	Oil	UNITED STATES	USA	North America	NA	23	6.4	AGTGAGAATGAGCGTCGGCATCCAATCATCATACCGGTCCTGGCGGCGGATTCCACAAAGCACATAC	ABBBBBAABBBBAABBAABAABBBBAAAABBBBBBBBBBABBBBABABABBBBAABBBBBBAAABAB
CN97366	Cultivar	1	Oil	UNITED STATES	USA	North America	NA	13	6.8	GGCGACGATAAGCGTCCACGTCCAACTGACATACCGGTCTTGGCAGCGAACTCCACAAGGCGGGTAC	BBABBABABABBAABBBBBBABBBBBBBBBBBBBBBBBBBBBBBBBABBBABBAABBBABBBBBBAB
CN97377	Cultivar	1	Oil	UNITED STATES	USA	North America	NA	12	6.8	GGCGAGGATGAGCGTCCACGTCCAACTGACATACCGGTCTTGGCGGTGGATTCCGCACGGGGCGTTC	BBABBBBABBBBAABBBBBBABBBBBBBBBBBBBBBBBBBBBBBABBBABBBBABBBAABABABBBB
CN97393	Cultivar	1	Oil	UNITED STATES	USA	North America	NA	19	7	GGCGAGGATGATCGTGGACGCCCAATCAATATACCAGTCTTGGCAGTGGACTCCGGAAGGCGCATTC	BBABBBBABBBAAABAABBBBBBBBAAABABBBBBABBBBBBBBBBBBABABBABABBABBBAABBB
CN97396	Cultivar	1	Oil	UNITED STATES	USA	North America	NA	14	6.6	GATGAGGATGAGCGTCGGCGTCCAACTGACATACCGGTCTTGGCAGCGAACTCCGGAAGGGGCGTTC	BABBBBBABBBBAABBAABBABBBBBBBBBBBBBBBBBBBBBBBBBABBBABBABABBABABABBBB
CN97403	Cultivar	1	Oil	UNITED STATES	USA	North America	NA	11	7.4	GACGAGGATGAGCGTCCGCGCCCAACTGACATACCGGTCTTCGCGGCGAACTCAGCAAAGCGCGTTC	BAABBBBABBBBAABBBABBBBBBBBBBBBBBBBBBBBBBBABBABABBBABBBBBBBBBBBABBBB
CN97407	Cultivar	1	Oil	UNITED STATES	USA	North America	NA	15	6.8	GGCGAGGATATGCGTCCGCGTCCAACTGACATACCGGTCTTGGCAGTGAACTTCGGAAGGGGCGTTC	BBABBBBABAABAABBBABBABBBBBBBBBBBBBBBBBBBBBBBBBBBBBABAABABBABABABBBB
CN97444	Cultivar	1	Oil	UNITED STATES	USA	North America	NA	14	6.8	GGCGAGGGTGAGCGTCGGCGTCCAACTGACATACCGGTCTTGGCAGCGGACTCCGCAAGGCGCGAAC	BBABBBBBBBBBAABBAABBABBBBBBBBBBBBBBBBBBBBBBBBBABABABBABBBBABBBABAAB
CN97463	Cultivar	1	Oil	UNITED STATES	USA	North America	NA	13	6.4	AGCGAGGATGAGCGTCCACGTCCAACTGACATACCGGTCTTGGCAGCGAACTCCACAAGGCACGTTC	ABABBBBABBBBAABBBBBBABBBBBBBBBBBBBBBBBBBBBBBBBABBBABBAABBBABBAABBBB
CN97586	Cultivar	1	Oil	UNITED STATES	USA	North America	NA	8	7	GGTGAGGATAAGCGTCGACGCCCAACTGACATACCGGTCTTGGCAGTGAATTTAGGAAAGCGCGTTC	BBBBBBBABABBAABBABBBBBBBBBBBBBBBBBBBBBBBBBBBBBBBBBBBABBABBBBBBABBBB
CN97587	Cultivar	1	Oil	UNITED STATES	USA	North America	NA	16	7.2	GACGAGGATATGCGTCCGCGTCCAACTGACATACGGGTCTTGGCAGTGGACTCCACAAAGCGCATTC	BAABBBBABAABAABBBABBABBBBBBBBBBBBBABBBBBBBBBBBBBABABBAABBBBBBBAABBB
CN97639	Cultivar	1	Oil	UNITED STATES	USA	North America	NA	16	6.2	AGCGAGGATATGAGTCGGCGCCCAACTGACATACCGGTCTTGGCAGCGAACTCCACAAGGCGCATAC	ABABBBBABAABBABBAABBBBBBBBBBBBBBBBBBBBBBBBBBBBABBBABBAABBBABBBAABAB
CN97639B	Cultivar	1	Oil	UNITED STATES	USA	North America	NA	14	7	GGCGAGGATATGATTCGGCGCCCAACTGACATACCGGTCTTCGCAGCGAACTCCACAAGGCGCGTAC	BBABBBBABAABBBBBAABBBBBBBBBBBBBBBBBBBBBBBABBBBABBBABBAABBBABBBABBAB
CN97642	Cultivar	1	Oil	UNITED STATES	USA	North America	NA	17	7	GGCGAGGATGAGCGTCCACGTCCAATCATCATATCGGCCTTGGCAGTGAATTCCAGAAGGGGCGTTC	BBABBBBABBBBAABBBBBBABBBBAAAABBBBABBBABBBBBBBBBBBBBBBAAABBABABABBBB
CN97649	Cultivar	1	Oil	UNITED STATES	USA	North America	NA	18	6.4	GGCGAGGATATGCGTCGGCGCCCAATCATCATACCGGTCTTGGCAGCGGATTCCACAAGGCGCGTTC	BBABBBBABAABAABBAABBBBBBBAAAABBBBBBBBBBBBBBBBBABABBBBAABBBABBBABBBB
CN97689	Cultivar	1	Oil	UNITED STATES	USA	North America	NA	14	7.2	GGCGAGGATGAGCGTCGACGTCCAACTGACATATCGGCCTTGGCAGTGAACTCCAGAAGGCGCGTTC	BBABBBBABBBBAABBABBBABBBBBBBBBBBBABBBABBBBBBBBBBBBABBAAABBABBBABBBB
CN97718	Cultivar	1	Oil	UNITED STATES	USA	North America	NA	11	8	GGCGAGGATAAGCGTCCGCACCCAACTGACATACCGGTCTTGGCAGTGAATTCCACAAAGCGCATTC	BBABBBBABABBAABBBABABBBBBBBBBBBBBBBBBBBBBBBBBBBBBBBBBAABBBBBBBAABBB
CN97728	Cultivar	1	Oil	UNITED STATES	USA	North America	NA	19	4.4	AGCGAGGATAAGCGTCCGCGCCCAATCATCATACCGGTCTTGGCAGTGAATTCCAGAAGGGGCATAC	ABABBBBABABBAABBBABBBBBBBAAAABBBBBBBBBBBBBBBBBBBBBBBBAAABBABABAABAB
CN97740	Cultivar	1	Oil	UNITED STATES	USA	North America	NA	17	6.6	GGCGACGATAAGCGTCGGCGTCCAACTGACATACCGGTCTTGGCAGCGAACTCCACAAGGCACATTC	BBABBABABABBAABBAABBABBBBBBBBBBBBBBBBBBBBBBBBBABBBABBAABBBABBAAABBB
CN97749	Cultivar	1	Oil	UNITED STATES	USA	North America	NA	16	5.2	GGCGAGGATATTCGTCCACATCCAATTGACATACCGGTCTTCGCAGCGAATTCCACAAGGCGCGTTC	BBABBBBABAAAAABBBBBAABBBBABBBBBBBBBBBBBBBABBBBABBBBBBAABBBABBBABBBB
CN97873	Cultivar	1	Oil	UNITED STATES	USA	North America	NA	24	5.6	AGTGAGGATATGCGTCGGCGTCCAATCATCATACCGGTCTTGGCGGCGAACTCCAGAAAGGACATAC	ABBBBBBABAABAABBAABBABBBBAAAABBBBBBBBBBBBBBBABABBBABBAAABBBBAAAABAB
CN97881	Cultivar	1	Oil	UNITED STATES	USA	North America	NA	24	3.8	AGCGAGAATATGCGTCGGCATCCAATCGTCATACCGGTATTGGCAGTGGATTCCAGAAGGGGCGTAC	ABABBBAABAABAABBAABAABBBBAABABBBBBBBBBABBBBBBBBBABBBBAAABBABABABBAB
CN97890	Cultivar	1	Oil	UNITED STATES	USA	North America	NA	11	6.8	GGTGACGATATGATTCCACGCCCAACTGTCATACCGGTCTTGGCAGTGGACTCAACAAAGGGCGTAC	BBBBBABABAABBBBBBBBBBBBBBBBBABBBBBBBBBBBBBBBBBBBABABBBABBBBBABABBAB
CN97907	Cultivar	1	Oil	UNITED STATES	USA	North America	NA	12	6.6	GGCGAGGGTATGCGTCGACGCCCAACTGTCATACCGGTCTAGGCAGTGAATTCAACAAAGGGCGTAC	BBABBBBBBAABAABBABBBBBBBBBBBABBBBBBBBBBBABBBBBBBBBBBBBABBBBBABABBAB
CN97921	Cultivar	1	Oil	UNITED STATES	USA	North America	NA	18	5.4	AGTGAGGATGAGCGTCCGCGTCCAACTGTCATACCGGTCTTGGCAGTGGACTCCAGAAGGGACATAC	ABBBBBBABBBBAABBBABBABBBBBBBABBBBBBBBBBBBBBBBBBBABABBAAABBABAAAABAB
CN98231	Cultivar	1	Oil	UNITED STATES	USA	North America	NA	14	4.6	GGCGAGGATAATATTCCACGTTCAACTAACATGCCGGTCTAGGCAGTGGACTCCGCAAAGCGCGTTG	BBABBBBABABABBBBBBBBAABBBBBABBBBABBBBBBBABBBBBBBABABBABBBBBBBBABBBA
CN98535	Cultivar	1	Oil	UNITED STATES	USA	North America	NA	15	5.6	GGTGAGGATAATCGTGCACGCCCAGTCGATATACCGGTCTTGGCAGTGAACTCAGGAAAGCGCATTG	BBBBBBBABABAAABABBBBBBBBAAABBABBBBBBBBBBBBBBBBBBBBABBBBABBBBBBAABBA
CN98542	Cultivar	1	Oil	UNITED STATES	USA	North America	NA	11	7.2	GGTGAGGGTATGCGTCCGCGTCCAACCGACATACCGGTCTTGGCAGTGGACTCAACAAAGGGGGTTC	BBBBBBBBBAABAABBBABBABBBBBABBBBBBBBBBBBBBBBBBBBBABABBBABBBBBABBBBBB
CN98639	Cultivar	1	Oil	UNITED STATES	USA	North America	NA	18	5.2	GACGAGGATAATCGACCACGCCCAATCGACATACCGGTCTTGGCAGTAGACTCCAGAAAGCGCGTAC	BAABBBBABABAAAABBBBBBBBBBAABBBBBBBBBBBBBBBBBBBBAABABBAAABBBBBBABBAB
CN98821	Cultivar	1	Oil	UNITED STATES	USA	North America	NA	19	5.8	AGCGAGGATAAGCGTCCGCGTCCAATTGTCATACCGGTCTTGGCGGCGAACTCCACAAGGCACATTC	ABABBBBABABBAABBBABBABBBBABBABBBBBBBBBBBBBBBABABBBABBAABBBABBAAABBB
CN97341	Cultivar	1	Oil	ARGENTINA	ARG	South America	SA	13	7	AGCGAGGATAAGCGTCCACGTCCAACTGACATACGGGTCTTGGCAGCGAACTCCACAAGGCGGGTTC	ABABBBBABABBAABBBBBBABBBBBBBBBBBBBABBBBBBBBBBBABBBABBAABBBABBBBBBBB
CN101610	Breeding line	1	Oil	CANADA	CAN	North America	NA	13	6.4	GGCGAGGATATGCGTCCACGCCCAACTGACATACCGGTCTTGGCAGTAATTTCCACAAAGGGCGTAC	BBABBBBABAABAABBBBBBBBBBBBBBBBBBBBBBBBBBBBBBBBBABABBBAABBBBBABABBAB
CN101016	Cultivar	1	Oil	CHINA	CHN	Eastern Aisa	EA	18	4.6	GGCGAGGATGAGCGTCCACGTCCAATCGTTATATCGGTCTTGGCAGCGGACTCCGCACGGGGCGTTC	BBABBBBABBBBAABBBBBBABBBBAABAABBBABBBBBBBBBBBBABABABBABBBAABABABBBB
CN98689	Cultivar	1	Oil	CZECH REPUBLIC	CZE	Central and Eastern Europe	CEE	15	7	GGCGAGGATAATCGTCCACGTCCAATTGACATACCGGTCTTGGCAGCGAACTCCACAAGGCGGATAC	BBABBBBABABAAABBBBBBABBBBABBBBBBBBBBBBBBBBBBBBABBBABBAABBBABBBBABAB
CN101327	Unknown	1	Fibre	ESTONIA	EST	Western Europe	WE	17	5.8	GGCGAGGGTGAGCGACCACGTTCAATCGTCATACCGGTCTTGGCAGTGGATACCAGACGGCGCGTTC	BBABBBBBBBBBAAABBBBBAABBBAABABBBBBBBBBBBBBBBBBBBABBABAAABAABBBABBBB
CN98742	Landrace	1	Oil	FRANCE	FRA	Western Europe	WE	3	8	GGTGAGGATGAGATTCCACGCCCAACTGACATACCGGTCTTGGCAGTGAATTCAGCAAGGCGGATTC	BBBBBBBABBBBBBBBBBBBBBBBBBBBBBBBBBBBBBBBBBBBBBBBBBBBBBBBBBABBBBABBB
CN100885	Unknown	1	Oil	GREECE	GRC	Southern Europe	SE	24	5.8	GGTGAGGACGAGCTACCGCGCCCAACTAATTCGCCGGTCTAGGCAGTGATCATAAGAAGAGGCGAAG	BBBBBBBAABBBABABBABBBBBBBBBABAAAABBBBBBBABBBBBBBBAAAABAABBAAABABAAA
CN100799	Cultivar	1	Oil	INDIA	IND	Southern Aisa	SAS	6	8.6	GGTGAGGGTGAGATTCCACGCCCGACTAACATACCGGTCTTGGCAGTGGACTCCGCAAAGCGGGTTG	BBBBBBBBBBBBBBBBBBBBBBBABBBABBBBBBBBBBBBBBBBBBBBABABBABBBBBBBBBBBBA
CN98193	Cultivar	1	Oil	MOROCCO	MAR	Africa	AF	14	6	GGCGACGATAAGCGTCCACGTCCAATTGACATACCGGTCTTGGCAGCGAACTCCACAAGGCGCGTTC	BBABBABABABBAABBBBBBABBBBABBBBBBBBBBBBBBBBBBBBABBBABBAABBBABBBABBBB
CN100797	Breeding line	1	Oil	NEW ZEALAND	NZL	Oceania	OC	12	6.6	GGCGAGGATAATATACCACGTTCAACTGACATACCGGTCTTGGCAGTGAATTCCACAAAGGGCGTAC	BBABBBBABABABBABBBBBAABBBBBBBBBBBBBBBBBBBBBBBBBBBBBBBAABBBBBABABBAB
CN100797B	Breeding line	1	Oil	NEW ZEALAND	NZL	Oceania	OC	12	7.2	GGCGAGGATAATATACCACGTTCAACTGACATACCGGTCTTGGCAGTGAATTCCACAAAGGGCGTAC	BBABBBBABABABBABBBBBAABBBBBBBBBBBBBBBBBBBBBBBBBBBBBBBAABBBBBABABBAB
CN100790	Cultivar	1	Oil	PAKISTAN	PAK	Southern Aisa	SAS	11	8	GACGAGGGTGAGCGTCCACGTCCAACTGACATACCGGTCTTCGCAGTGAACTCCGCAAAGGGCGTTG	BAABBBBBBBBBAABBBBBBABBBBBBBBBBBBBBBBBBBBABBBBBBBBABBABBBBBBABABBBA
CN97768	Cultivar	1	Oil	PORTUGAL	PRT	Southern Europe	SE	16	6	GGCGAGGACGAGATTCGACGTCCAACTAATATACCGGTATTGGCGACGAATTCCGGAAAGGGCGTAC	BBABBBBAABBBBBBBABBBABBBBBBABABBBBBBBBABBBBBAAABBBBBBABABBBBABABBAB
CN97483	Landrace	1	Oil	RUSSIAN FEDERATION	RUS	Central and Eastern Europe	CEE	18	6	AGCGAGGATGAGCGTGGGCGTCCAACTGTCATACCGGTCTACGCGGTGGATTTCGCACAGCGCGTTC	ABABBBBABBBBAABAAABBABBBBBBBABBBBBBBBBBBAABBABBBABBBAABBBABBBBABBBB
CN100828	Unknown	1	Oil	TURKEY	TUR	Western Aisa	WA	7	6.8	GGTGAGGATGAGATTGCACGTCCAACTAACATACCGGTCTTGGCAGTGAACTCCGCAAAGCGGGTTG	BBBBBBBABBBBBBBABBBBABBBBBBABBBBBBBBBBBBBBBBBBBBBBABBABBBBBBBBBBBBA
CN97402	Breeding line	1	Oil	UNITED STATES	USA	North America	NA	11	6.8	AGCGAGGATGAGAGTCGACGCCCAACTGTCATACCGGTCTTGGCAGTGAATTCCACAAGGCGCATTC	ABABBBBABBBBBABBABBBBBBBBBBBABBBBBBBBBBBBBBBBBBBBBBBBAABBBABBBAABBB
CN97406	Breeding line	1	Oil	UNITED STATES	USA	North America	NA	11	8.2	GGTGAGGATGAGATTCGACGTCCAACTGACATACCGGTCTTGGCAGCGAATTTCGGAAAGGGCATAC	BBBBBBBABBBBBBBBABBBABBBBBBBBBBBBBBBBBBBBBBBBBABBBBBAABABBBBABAABAB
CN97584	Breeding line	1	Oil	UNITED STATES	USA	North America	NA	12	7	GGTGAGGATATTATACGACGCTCAACTGACATACCGGTCTTCGCAGTGAACTCCACAAAGCGCGTTC	BBBBBBBABAAABBABABBBBABBBBBBBBBBBBBBBBBBBABBBBBBBBABBAABBBBBBBABBBB
CN97584B	Breeding line	1	Oil	UNITED STATES	USA	North America	NA	11	7.4	GGTGAGGATATTATTCGACGCTCAACTGACATACCGGTCTTCGCAGTGAACTCCACAAAGCGCGTTC	BBBBBBBABAAABBBBABBBBABBBBBBBBBBBBBBBBBBBABBBBBBBBABBAABBBBBBBABBBB
CN97670	Breeding line	1	Oil	UNITED STATES	USA	North America	NA	13	7.6	GGCGAGGATAAGCGTCCACGTCCAACTGTCATACCGGCCTTGGCAGTGAATTCCACAAGGCAGATTC	BBABBBBABABBAABBBBBBABBBBBBBABBBBBBBBABBBBBBBBBBBBBBBAABBBABBABABBB
CN98644	Breeding line	1	Oil	UNITED STATES	USA	North America	NA	9	7.3	GGCGAGGATAAGCGTCCACGCCCAACTGACATACCGGTCTTGGCAGTGAACTCAACAAGGCGGATTC	BBABBBBABABBAABBBBBBBBBBBBBBBBBBBBBBBBBBBBBBBBBBBBABBBABBBABBBBABBB
CN97397	Cultivar	1	Oil	UNITED STATES	USA	North America	NA	9	7.2	GGCGAGGATGAGAGTCCACGCCCAATTGTCATACCGGTCTTGGCAGTGAACTCCACAAGGCGGGTTC	BBABBBBABBBBBABBBBBBBBBBBABBABBBBBBBBBBBBBBBBBBBBBABBAABBBABBBBBBBB
CN97452	Cultivar	1	Fibre	UNITED STATES	USA	North America	NA	16	6.8	GGTGAGGATGAGCGTCGGCGTCCAACTGATACACCGGTCTTCGCAGTGGATTCCACACGGCGCATTC	BBBBBBBABBBBAABBAABBABBBBBBBBABABBBBBBBBBABBBBBBABBBBAABBAABBBAABBB
CN97453	Cultivar	1	Oil	UNITED STATES	USA	North America	NA	8	7.6	GGTGAGGATGAGCGTCGACGCCCAACTGACATACCGGTCTTGGCAGTGAATTTCACAAAGCGCGTTC	BBBBBBBABBBBAABBABBBBBBBBBBBBBBBBBBBBBBBBBBBBBBBBBBBAAABBBBBBBABBBB
CN98610	Cultivar	1	Oil	UNITED STATES	USA	North America	NA	10	8	GGCGAGGATAAGCGTCCACGTCCAACTGACATACCGGTCTTGGCAGTGAACTCCACAAGGCGGGTTC	BBABBBBABABBAABBBBBBABBBBBBBBBBBBBBBBBBBBBBBBBBBBBABBAABBBABBBBBBBB
CN98923	Breeding line	2	Oil	UNITED STATES	USA	North America	NA	10	9	GATGAGGATGATCGTCCACGCCCAACTGACATACCGGTCTTCGCAGTGGATTCAGCAAGGGGCGTTC	BABBBBBABBBAAABBBBBBBBBBBBBBBBBBBBBBBBBBBABBBBBBABBBBBBBBBABABABBBB
CN101510	Breeding line	2	Oil	CANADA	CAN	North America	NA	14	7.4	GATGAGGATGATCGTCCACGTCCAACTGACATACCGGTCTTCGCAGTGATTTTCGGAAAGGGCGTAC	BABBBBBABBBAAABBBBBBABBBBBBBBBBBBBBBBBBBBABBBBBBBABBAABABBBBABABBAB
CN101511	Breeding line	2	Oil	CANADA	CAN	North America	NA	14	6.8	GATGAGGATGATCGTCCACGTCCAACTGACATACCGGTCTTCGCAGTGATTTTCGGAAAGGGCGTAC	BABBBBBABBBAAABBBBBBABBBBBBBBBBBBBBBBBBBBABBBBBBBABBAABABBBBABABBAB
CN101535	Breeding line	2	Oil	CANADA	CAN	North America	NA	12	6.8	GATGAGGATAATATTCCACGTCCAACTGACATACCGGTCTTCGCAGTGAATTTCGGAAAGGGCGTAC	BABBBBBABABABBBBBBBBABBBBBBBBBBBBBBBBBBBBABBBBBBBBBBAABABBBBABABBAB
CN101536	Breeding line	2	Oil	CANADA	CAN	North America	NA	17	4.4	GATGAGGATAATCGTGCACGTCCAACTGACATACCGGTCTTCGCAGCGAACTTCGGAAAGGGCGTAC	BABBBBBABABAAABABBBBABBBBBBBBBBBBBBBBBBBBABBBBABBBABAABABBBBABABBAB
CN101542	Breeding line	2	Oil	CANADA	CAN	North America	NA	12	8.4	GACGAGGATAATATTCCACGTCCAACTGACATACCGGTCTTGGCAGTGAATTTCGGAAAGGGCGTAC	BAABBBBABABABBBBBBBBABBBBBBBBBBBBBBBBBBBBBBBBBBBBBBBAABABBBBABABBAB
CN97176	Cultivar	2	Oil	CZECH REPUBLIC	CZE	Central and Eastern Europe	CEE	16	6.4	GACGAGGATAATCGTCCACGTCCAACTGACATACCGGTCTTCGCAGCGAATTTCGGAAAGGGCGTAC	BAABBBBABABAAABBBBBBABBBBBBBBBBBBBBBBBBBBABBBBABBBBBAABABBBBABABBAB
CN98263	Cultivar	2	Oil	HUNGARY	HUN	Central and Eastern Europe	CEE	15	6.6	GATGAGGATGATCGTCCACGTCCAACTGACATACCGGTCTTCGCAGTGATTTTCGGAAGGGGCGTAC	BABBBBBABBBAAABBBBBBABBBBBBBBBBBBBBBBBBBBABBBBBBBABBAABABBABABABBAB
CN98263B	Cultivar	2	Oil	HUNGARY	HUN	Central and Eastern Europe	CEE	15	6.3	GATGAGGATGATCGTCCACGTCCAACTGACATACCGGTCTTCGCAGTGATTTTCGGAAGGGGCGTAC	BABBBBBABBBAAABBBBBBABBBBBBBBBBBBBBBBBBBBABBBBBBBABBAABABBABABABBAB
CN98854	Cultivar	2	Oil	HUNGARY	HUN	Central and Eastern Europe	CEE	14	7.4	GACGAGGATAATCGTCCACGTCCAACTGACATACCGGTCTTGGCAGTGAATTTCGGAAAGGGCGTAC	BAABBBBABABAAABBBBBBABBBBBBBBBBBBBBBBBBBBBBBBBBBBBBBAABABBBBABABBAB
CN98057	Cultivar	2	Oil	INDIA	IND	Southern Aisa	SAS	16	6.6	GACGAGGATAATCGTCCACGTCCAACTGACATACCGGTCTTCGCAGCGAATTTCGGAAAGGGCGTAC	BAABBBBABABAAABBBBBBABBBBBBBBBBBBBBBBBBBBABBBBABBBBBAABABBBBABABBAB
CN98109	Cultivar	2	Oil	INDIA	IND	Southern Aisa	SAS	13	6	GACGAGGATAATATTCCACGTCCAACTGACATACCGGTCTTCGCAGTGAATTTCGGAAAGGGCGTAC	BAABBBBABABABBBBBBBBABBBBBBBBBBBBBBBBBBBBABBBBBBBBBBAABABBBBABABBAB
CN98135	Cultivar	2	Oil	INDIA	IND	Southern Aisa	SAS	15	6.8	GACGAGGATGATCGTCCACGTCCAACTGACATACCGGTCTTGGCAGCGAACTTCGGAAAGGGCGTAC	BAABBBBABBBAAABBBBBBABBBBBBBBBBBBBBBBBBBBBBBBBABBBABAABABBBBABABBAB
CN98254	Cultivar	2	Oil	INDIA	IND	Southern Aisa	SAS	16	7	GACGAGGATAATCGTCCACGTCCAACTGACATACCGGTCTTCGCAGCGAATTTCGGAAAGGGCGTAC	BAABBBBABABAAABBBBBBABBBBBBBBBBBBBBBBBBBBABBBBABBBBBAABABBBBABABBAB
CN98364	Cultivar	2	Oil	INDIA	IND	Southern Aisa	SAS	14	4	GATGAGGATGATCGTCCACGTCCAACTGACATACCGGTCTTGGCAGCGAACTTCGGAAAGGGCGTAC	BABBBBBABBBAAABBBBBBABBBBBBBBBBBBBBBBBBBBBBBBBABBBABAABABBBBABABBAB
CN98415	Cultivar	2	Oil	INDIA	IND	Southern Aisa	SAS	12	8	GATGAGGATAATATTCCACGTCCAACTGACATACCGGTCTTCGCAGTGAATTTCGGAAAGGGCGTAC	BABBBBBABABABBBBBBBBABBBBBBBBBBBBBBBBBBBBABBBBBBBBBBAABABBBBABABBAB
CN98440	Cultivar	2	Oil	INDIA	IND	Southern Aisa	SAS	15	6	GATGAGGATAATCGTCCACGTCCAACTGACATACCGGTCTTGGCAGCGGACTTCGGAAAGGGCGTTC	BABBBBBABABAAABBBBBBABBBBBBBBBBBBBBBBBBBBBBBBBABABABAABABBBBABABBBB
CN98467	Cultivar	2	Oil	INDIA	IND	Southern Aisa	SAS	12	8.6	GGTGAGGATGATATTCCACGTCCAACTGATATACCGGTCTTCGCAGCGAATTTCGGAAAGGGCGTAC	BBBBBBBABBBABBBBBBBBABBBBBBBBABBBBBBBBBBBABBBBABBBBBAABABBBBABABBAB
CN98468	Cultivar	2	Oil	INDIA	IND	Southern Aisa	SAS	12	7	GGCGAGGATGATATTCCACGTCCAACTGATATACCGGTCTTCGCAGTGGATTTCGGAAAGCGCGTAC	BBABBBBABBBABBBBBBBBABBBBBBBBABBBBBBBBBBBABBBBBBABBBAABABBBBBBABBAB
CN98969	Cultivar	2	Oil	INDIA	IND	Southern Aisa	SAS	15	6.8	GACGAGGATAATATTCCACGTCCAACTGACATACCGGTCTTCGCAGCGAACTTCGGAAAGGGCGTAC	BAABBBBABABABBBBBBBBABBBBBBBBBBBBBBBBBBBBABBBBABBBABAABABBBBABABBAB
CN98973	Cultivar	2	Oil	INDIA	IND	Southern Aisa	SAS	15	6.8	GATGAGGATAATCGTCCACGTCCAACTGACATACCGGTCTTGGCAGCGAACTTCGGAAAGGGCGTAC	BABBBBBABABAAABBBBBBABBBBBBBBBBBBBBBBBBBBBBBBBABBBABAABABBBBABABBAB
CN98240B	Landrace	2	Oil	INDIA	IND	Southern Aisa	SAS	14	6.3	GATGAGGATGATCGTCCACGTCCAACTGACATACCGGTCTTCGCAGCGAATTTCGGAAAGGGCGTAC	BABBBBBABBBAAABBBBBBABBBBBBBBBBBBBBBBBBBBABBBBABBBBBAABABBBBABABBAB
CN98242	Landrace	2	Oil	INDIA	IND	Southern Aisa	SAS	15	5	GACGAGGATGATCGTCCACGTCCAACTGACATACCGGTCTTCGCAGCGAATTTCGGAAAGGGCGTAC	BAABBBBABBBAAABBBBBBABBBBBBBBBBBBBBBBBBBBABBBBABBBBBAABABBBBABABBAB
CN97139	Cultivar	2	Oil	IRAN	IRN	Southern Aisa	SAS	15	6	GATGAGGATAATCGTCCACGTCCAACTGACATACCGGTCTTGGCAGCGAACTTCGGAAAGGGCGTAC	BABBBBBABABAAABBBBBBABBBBBBBBBBBBBBBBBBBBBBBBBABBBABAABABBBBABABBAB
CN100629	Cultivar	2	Oil	PAKISTAN	PAK	Southern Aisa	SAS	13	7	GATGAGGATGATCGTCCACGTCCAACTGACATACCGGTCTTCGCAGTGAATTTCGGAAGGGGCGTTC	BABBBBBABBBAAABBBBBBABBBBBBBBBBBBBBBBBBBBABBBBBBBBBBAABABBABABABBBB
CN97064	Cultivar	2	Oil	PAKISTAN	PAK	Southern Aisa	SAS	15	5.4	GACGAGGATGATCGTCCACGTCCAACTGACATACCGGTCTTCGCAGTGATTTTCGGAAAGGGCGTAC	BAABBBBABBBAAABBBBBBABBBBBBBBBBBBBBBBBBBBABBBBBBBABBAABABBBBABABBAB
CN97092	Cultivar	2	Oil	PAKISTAN	PAK	Southern Aisa	SAS	12	5.2	GATGAGGATAATATTGGGCGTCCAACTGACATACCGGTCTTGGCAGTGAATTTCGGAAAGCGCGTTC	BABBBBBABABABBBAAABBABBBBBBBBBBBBBBBBBBBBBBBBBBBBBBBAABABBBBBBABBBB
CN97096	Cultivar	2	Oil	PAKISTAN	PAK	Southern Aisa	SAS	17	5.6	GACGAGGATAATATTGGGCGTCCAACTGACATACCGGTCTTCGCAGTGAACTTCGGAAGGGGCGTTC	BAABBBBABABABBBAAABBABBBBBBBBBBBBBBBBBBBBABBBBBBBBABAABABBABABABBBB
CN98237	Cultivar	2	Oil	PAKISTAN	PAK	Southern Aisa	SAS	14	7.2	GACGAGGATAATCGTCCACGTCCAACTGACATACCGGTCTTGGCAGTGAATTTCGGAAAGGGCGTAC	BAABBBBABABAAABBBBBBABBBBBBBBBBBBBBBBBBBBBBBBBBBBBBBAABABBBBABABBAB
CN98239	Cultivar	2	Oil	PAKISTAN	PAK	Southern Aisa	SAS	13	7.2	GATGAGGATGATCGTCCACGTCCAACTGACATACCGGTCTTCGCAGTGAATTTCGGAAGGGGCGTTC	BABBBBBABBBAAABBBBBBABBBBBBBBBBBBBBBBBBBBABBBBBBBBBBAABABBABABABBBB
CN97072	Landrace	2	Oil	PAKISTAN	PAK	Southern Aisa	SAS	15	4.6	GATGAGGATAATCGTCCACGTCCAACTGACATACCGGTCTTGGCAGCGAACTTCGGAAAGGGCGTAC	BABBBBBABABAAABBBBBBABBBBBBBBBBBBBBBBBBBBBBBBBABBBABAABABBBBABABBAB
CN97083	Landrace	2	Oil	PAKISTAN	PAK	Southern Aisa	SAS	15	6	GGCGAGGATGATCGTCCACGTCCAACTGACATACCGGTCTTCGCAGTGATTTTCGGAAGGGGCGTAC	BBABBBBABBBAAABBBBBBABBBBBBBBBBBBBBBBBBBBABBBBBBBABBAABABBABABABBAB
CN98541	Cultivar	2	Oil	UNITED STATES	USA	North America	NA	17	6.4	AACGAGGATGATCGTCCACGTCCAACTGACATACCGGCCTTCGCAGTGATTTTCGGAAAGGGCGTAC	AAABBBBABBBAAABBBBBBABBBBBBBBBBBBBBBBABBBABBBBBBBABBAABABBBBABABBAB
CN98613	Cultivar	2	Oil	UNITED STATES	USA	North America	NA	14	5.8	GACGAGGATATTATTCCACGCCCAACTGACATACCGGTCTTCGCAGTGATTTTCGGAAGGGGCGTTC	BAABBBBABAAABBBBBBBBBBBBBBBBBBBBBBBBBBBBBABBBBBBBABBAABABBABABABBBB
CN100678	Cultivar	2	Oil	ROMANIA	ROM	Central and Eastern Europe	CEE	13	7.4	GACGAGGATGATCGTCCACGTCCAACTGACATACCGGTCTTGGCAGTGAATTTCGGAAAGGGCGTAC	BAABBBBABBBAAABBBBBBABBBBBBBBBBBBBBBBBBBBBBBBBBBBBBBAABABBBBABABBAB
CN101038	Cultivar	3	Fibre	BELARUS	BLR	Central and Eastern Europe	CEE	23	5.6	GGCGAGGATATTATTGGACATCCAACTGACATACGGGTCTTGGCGGTGGATTTCAGAAGAGGCATAG	BBABBBBABAAABBBAABBAABBBBBBBBBBBBBABBBBBBBBBABBBABBBAAAABBAAABAABAA
CN101559	Breeding line	3	Fibre	CANADA	CAN	North America	NA	28	4.6	AGCGACGATATTATACGGCGTCCAACTGACATACCGGTCTTCACGACGAACTTCAGAAGAGACATTG	ABABBABABAAABBABAABBABBBBBBBBBBBBBBBBBBBBAABAAABBBABAAAABBAAAAAABBA
CN100848	Cultivar	3	Oil	CANADA	CAN	North America	NA	22	6.4	GGTGAGGATATTCGACGACGTTCAACTGACATACCGGTCTTGGCGACGGACTCCAGAAGGGGCGTTG	BBBBBBBABAAAAAABABBBAABBBBBBBBBBBBBBBBBBBBBBAAABABABBAAABBABABABBBA
CN101230	Breeding line	3	Fibre	CHINA	CHN	Eastern Aisa	EA	39	3	AACGAGGACATTCGAGCGCGTCCGGCCAACATACGAACCTTCGAGACGGACTTCAGGCGGCGCATTG	AAABBBBAAAAAAAAABABBABBAABAABBBBBBAAAABBBABAAAABABABAAAAAAABBBAABBA
CN101417	Breeding line	3	Fibre	CHINA	CHN	Eastern Aisa	EA	34	7.2	AACGAGGATATTCGTCCGCGTCTGGCCAACATACCAACCTTCGCGACGGACTTCAGACGGCGCATTG	AAABBBBABAAAAABBBABBABAAABAABBBBBBBAAABBBABBAAABABABAAAABAABBBAABBA
CN101419	Breeding line	3	Fibre	CHINA	CHN	Eastern Aisa	EA	34	2.8	AACGACGATATTCGTCGACGTCCAATCAACATACCGGTCTTCGAGACGGTCTTCAGACAAGGCAAAC	AAABBABABAAAAABBABBBABBBBAAABBBBBBBBBBBBBABAAAABAAABAAAABABAABAAAAB
CN101421	Breeding line	3	Fibre	CHINA	CHN	Eastern Aisa	EA	30	4.6	AACGACAATAAGCGTCGACATCTAACCATCATACCGGTCTTCGAGACGGACTTCACGCGGCGCGTTC	AAABBAAABABBAABBABBAABABBBAAABBBBBBBBBBBBABAAAABABABAAABAAABBBABBBB
CN101392	Cultivar	3	Fibre	FRANCE	FRA	Western Europe	WE	26	6	AACGAGGATGAGCGAGCACATCCAACTGACATACGAACCTTCACGGTAGACTTCAGAAAGCGCATTC	AAABBBBABBBBAAAABBBAABBBBBBBBBBBBBAAAABBBAABABBAABABAAAABBBBBBAABBB
CN98708	Cultivar	3	Oil	FRANCE	FRA	Western Europe	WE	23	6	GGCACCGATAATCGTGCACGTTCAACTGACATACGGATCTTGGCAGTGAACATCAGAAGGCGCGTTG	BBAAAABABABAAABABBBBAABBBBBBBBBBBBABABBBBBBBBBBBBBAAAAAABBABBBABBBA
CN100864	Cultivar	3	Oil	HUNGARY	HUN	Central and Eastern Europe	CEE	32	5.2	GGTGAGGATGAGCGTGGGCGTCTAATCATCTTGTGAACACTGGCAGTGGACTTCAGACGGGGGATTG	BBBBBBBABBBBAABAAABBABABBAAAABABAAAAAAAABBBBBBBBABABAAAABAABABBABBA
CN97180	Cultivar	3	Oil	IRAN	IRN	Southern Aisa	SAS	28	5	GGTGAGGATGAGCGTGGGCGTCTAATCATCTTACGGGCACTGGCAGTGGACTTCAGACGGGGGATTG	BBBBBBBABBBBAABAAABBABABBAAAABABBBABBAAABBBBBBBBABABAAAABAABABBABBA
CN98072	Cultivar	3	Fibre	JAPAN	JPN	Eastern Aisa	EA	21	5.4	AGTGCGGATATTCGACGACGTTCAACTGACATACCGGTCTTGGCAATGGATTTCAGAAGGGGCGTTC	ABBBABBABAAAAAABABBBAABBBBBBBBBBBBBBBBBBBBBBBABBABBBAAAABBABABABBBB
CN101118	Breeding line	3	Fibre	LITHUANIA	LTU	Northern Europe	NE	25	3.2	AGCGACGATAATCGAGGACGTCCAACTGACATACGGGTCTTCGCAGCGGACTTCAGAAGGGGCATTC	ABABBABABABAAAAAABBBABBBBBBBBBBBBBABBBBBBABBBBABABABAAAABBABABAABBB
CN18998	Cultivar	3	Fibre	NETHERLANDS	NLD	Western Europe	WE	31	4	GGCACCGATAAGCGTCCGTATTCAATTGACATGCGGGCACTCGCAGCAAACTCCACGCGGCAGATTG	BBAAAABABABBAABBBAAAAABBBABBBBBBABABBAAABABBBBAABBABBAABAAABBABABBA
CN101403	Unknown	3	Fibre	ROMANIA	ROM	Central and Eastern Europe	CEE	34	4	GACGAGGACGATCGACGACGTCCAACCAATACACGGGTCTTCAAGGCAGACATCAGAAGAGGCATAC	BAABBBBAABBAAAABABBBABBBBBAABABABBABBBBBBAAAABAAABAAAAAABBAAABAABAB
CN101039	Breeding line	3	Fibre	RUSSIAN FEDERATION	RUS	Central and Eastern Europe	CEE	25	6.6	AACGAGGATGAGATAGGACGTCCAACTATCATACCGGTCTACACGGTGGACTTCAGAAAAGGCATTG	AAABBBBABBBBBBAAABBBABBBBBBAABBBBBBBBBBBAAABABBBABABAAAABBBAABAABBA
CN101055	Breeding line	3	Fibre	RUSSIAN FEDERATION	RUS	Central and Eastern Europe	CEE	22	5.8	AACGAGGATATTCGTCGGCGTCCAACCAACATACCGGTCTTGGCGGTGGACTCCAGAAAGCGCATTC	AAABBBBABAAAAABBAABBABBBBBAABBBBBBBBBBBBBBBBABBBABABBAAABBBBBBAABBB
CN101127	Breeding line	3	Fibre	RUSSIAN FEDERATION	RUS	Central and Eastern Europe	CEE	36	5.4	AACGAGGACATTCGTGGACGTCCAACTATTTCGTGAACCTTGACGGTAGATTTCAGAAAAGGCGTTG	AAABBBBAAAAAAABAABBBABBBBBBAAAAAAAAAAABBBBABABBAABBBAAAABBBAABABBBA
CN101094	Cultivar	3	Fibre	RUSSIAN FEDERATION	RUS	Central and Eastern Europe	CEE	43	3.6	AACGCGGACATTCGAGGACATTCAACCAACATGTGAACCTTCGCAACAGTCTTCACAAGAGGCAAAG	AAABABBAAAAAAAAAABBAAABBBBAABBBBAAAAAABBBABBBAAAAAABAAABBBAAABAAAAA
CN101096	Cultivar	3	Fibre	RUSSIAN FEDERATION	RUS	Central and Eastern Europe	CEE	32	3.6	AACGAGAATATTCGAGGACGTCCAACCAACATACCGGTCTTCGCGACGGACTTCAGAAGAGGCATTG	AAABBBAABAAAAAAAABBBABBBBBAABBBBBBBBBBBBBABBAAABABABAAAABBAAABAABBA
CN101099	Cultivar	3	Fibre	RUSSIAN FEDERATION	RUS	Central and Eastern Europe	CEE	35	3.8	AACGAGGATATTCGAGGACATCCAACCAATACGCGGGTCTTCGCGACGGACTTCAGAAGAGGCATTC	AAABBBBABAAAAAAAABBAABBBBBAABABAABABBBBBBABBAAABABABAAAABBAAABAABBB
CN101136	Cultivar	3	Fibre	RUSSIAN FEDERATION	RUS	Central and Eastern Europe	CEE	24	4.4	GACGACGATATTCGAGCACGTCCAACTGTCATACGGGTCTTGGCGACGAATTCCAGAAGGCACGTTG	BAABBABABAAAAAAABBBBABBBBBBBABBBBBABBBBBBBBBAAABBBBBBAAABBABBAABBBA
CN35791	Cultivar	3	Fibre	RUSSIAN FEDERATION	RUS	Central and Eastern Europe	CEE	25	5.2	AACGAGGATATTCGTCGACGTCCAACCAATACGCGGGTCTTGGCGGTGGATTTCAGAAAGCGCATTC	AAABBBBABAAAAABBABBBABBBBBAABABAABABBBBBBBBBABBBABBBAAAABBBBBBAABBB
CN101394	Unknown	3	Fibre	RUSSIAN FEDERATION	RUS	Central and Eastern Europe	CEE	23	6.4	AACGAGGATATTATAGGACGTCCAACTGACATACCGGTCTTCGCGGTGGATTTCAGAAAAGGCATTG	AAABBBBABAAABBAAABBBABBBBBBBBBBBBBBBBBBBBABBABBBABBBAAAABBBAABAABBA
CN101401	Unknown	3	Fibre	RUSSIAN FEDERATION	RUS	Central and Eastern Europe	CEE	27	5.2	AACGAGGATATTCGAGGACGTCCAACTGTCATACGGGTCTTCACGGTGGACTTCAGAAAGCGCATTG	AAABBBBABAAAAAAAABBBABBBBBBBABBBBBABBBBBBAABABBBABABAAAABBBBBBAABBA
CN101406	Unknown	3	Fibre	RUSSIAN FEDERATION	RUS	Central and Eastern Europe	CEE	34	3.8	AACGAGGATATTCGTGGGCATCCAACCAATACGCGGGTCTTGGCGACGGACTTCAGGCGGCGCATTC	AAABBBBABAAAAABAAABAABBBBBAABABAABABBBBBBBBBAAABABABAAAAAAABBBAABBB
CN98926	Breeding line	3	Fibre	UNITED STATES	USA	North America	NA	27	6.3	AGCACGGATATGATACGGCATCCAACTGACATACCGGTCTACGCGGCGGACTCCAGAAAAGACATTG	ABAAABBABAABBBABAABAABBBBBBBBBBBBBBBBBBBAABBABABABABBAAABBBAAAAABBA
CN98946	Cultivar	3	Fibre	UNITED STATES	USA	North America	NA	21	4.8	GGTGAGGATATTCGACGACGTTCAACTGACATACCGGTCTTCGCGACGAACTCCAGAAAGGGCGTTG	BBBBBBBABAAAAAABABBBAABBBBBBBBBBBBBBBBBBBABBAAABBBABBAAABBBBABABBBA
CN98954	Cultivar	3	Fibre	UNITED STATES	USA	North America	NA	27	5.2	GGCACCGATATGATACGGCGTTCAACTGACATACCGGTCTACGCGGCGGACTCCAGAAAAGACATTG	BBAAAABABAABBBABAABBAABBBBBBBBBBBBBBBBBBAABBABABABABBAAABBBAAAAABBA
CN97334	Cultivar	3	Oil	ARGENTINA	ARG	South America	SA	23	5.4	GATGAGGATATTCGACCACGCCCAACTAACATACCGGTCTTCGCGACAGACTCCAGAAGGGACGTTC	BABBBBBABAAAAAABBBBBBBBBBBBABBBBBBBBBBBBBABBAAAAABABBAAABBABAAABBBB
CN101454	Breeding line	3	Oil	CANADA	CAN	North America	NA	20	5.4	GGTGAGGATATTCGACGACGTCCAACTGACATACCGGTCTTCGCGACGAACTCCAGAAGGCGCGTTG	BBBBBBBABAAAAAABABBBABBBBBBBBBBBBBBBBBBBBABBAAABBBABBAAABBABBBABBBA
CN101560	Breeding line	3	Oil	CANADA	CAN	North America	NA	23	4.6	GGCGAGGATATTATACGACGTCCAATCAACATACCGGTCTTGGCGGCGGACTCCAGAAGGGACGTAC	BBABBBBABAAABBABABBBABBBBAAABBBBBBBBBBBBBBBBABABABABBAAABBABAAABBAB
CN101598	Breeding line	3	Oil	CANADA	CAN	North America	NA	18	6	GGTGAGGATAATCGTCGGCGTCCAATCGACATACCGGTCTTGGCAACGGATTCCGGAAGGGGCGTTC	BBBBBBBABABAAABBAABBABBBBAABBBBBBBBBBBBBBBBBBAABABBBBABABBABABABBBB
CN19158	Cultivar	3	Oil	CANADA	CAN	North America	NA	24	6	GGTGAGGATATTCGACGACGTTCAATCGACATACCGGTCTTGGCGACGGACTCCAGAAGGGGCGTTG	BBBBBBBABAAAAAABABBBAABBBAABBBBBBBBBBBBBBBBBAAABABABBAAABBABABABBBA
CN98683	Cultivar	3	Oil	CZECH REPUBLIC	CZE	Central and Eastern Europe	CEE	30	6	GGTACCGATATTCGTCGGTGTTTGGCTGTCATACCGGTCTACGCGGCGGACTTCAGAAAGCGCATTC	BBBAAABABAAAAABBAAABAAAAABBBABBBBBBBBBBBAABBABABABABAAAABBBBBBAABBB
CN101289	Breeding line	3	Fibre	RUSSIAN FEDERATION	RUS	Central and Eastern Europe	CEE	27	4.4	GGCACGGATAATCGTCGGCGTCCGACTGTCATACGGGTATACGCGGCGGACTCCACAAGGCGCATTG	BBAAABBABABAAABBAABBABBABBBBABBBBBABBBABAABBABABABABBAABBBABBBAABBA
CN101299	Breeding line	3	Fibre	RUSSIAN FEDERATION	RUS	Central and Eastern Europe	CEE	27	3	AACGAGGATATTCGTCGGCGTCCAACTGATACGCCGGTCTTCGCGACGGACTCCAGAAGGCGCATTC	AAABBBBABAAAAABBAABBABBBBBBBBABAABBBBBBBBABBAAABABABBAAABBABBBAABBB
CN101301	Breeding line	3	Fibre	RUSSIAN FEDERATION	RUS	Central and Eastern Europe	CEE	36	4.4	AACGACGATATTCGAGGACATCCAACCAACATATGAACACTCGCGGTGGACATCAGAAGGCGCATTC	AAABBABABAAAAAAAABBAABBBBBAABBBBBAAAAAAABABBABBBABAAAAAABBABBBAABBB
CN98812	Cultivar	3	Oil	UNITED STATES	USA	North America	NA	26	5.6	GGTGAGGATATTCGACGGCATCCAATCAACATATCGGCCCTGGCAGTGGACTCCAGAAGGGGCGTTG	BBBBBBBABAAAAAABAABAABBBBAAABBBBBABBBABABBBBBBBBABABBAAABBABABABBBA
CN101572	Breeding line	3	Fibre	CANADA	CAN	North America	NA	21	5	GGCGACGATAATCGTGCACGTTCAACTGACATACGGATCTTGGCAGTGAACATCAGAAGGCGCATTC	BBABBABABABAAABABBBBAABBBBBBBBBBBBABABBBBBBBBBBBBBAAAAAABBABBBAABBB
CN101052	Breeding line	4	Fibre	CHINA	CHN	Eastern Aisa	EA	37	3.4	GGCGACAACATGCGTCGATATCCGGTTGTTATATGGGTCTAGGAGGCAGACTCCACGCGGCGCAAAG	BBABBAAAAAABAABBABAAABBAAABBAABBBAABBBBBABBAABAAABABBAABAAABBBAAAAA
CN101053	Breeding line	4	Fibre	CHINA	CHN	Eastern Aisa	EA	52	3	AACGCCAACATTCGAGGACATCTGGTCATTTCGTGGGTCTACAAGGTAGACTTCAGGCAGGACAAAG	AAABAAAAAAAAAAAAABBAABAAAAAAAAAAAAABBBBBAAAAABBAABABAAAAAABBAAAAAAA
CN18982	Cultivar	4	Fibre	FRANCE	FRA	Western Europe	WE	58	3.2	AATACCAACATTCGAGGGTATTTGGTCATTTCGTGAACACACAAGGTAGTCTTCAGAAAGCACAAAG	AABAAAAAAAAAAAAAAAAAAAAAAAAAAAAAAAAAAAAAAAAAABBAAAABAAAABBBBBAAAAAA
CN18988	Cultivar	4	Fibre	FRANCE	FRA	Western Europe	WE	49	3.2	AACGACGACATTCGAGGGTATTTGGCTATTTCACGGGCCTACACGGTAGTCTTCAGAAGGGACAAAG	AAABBABAAAAAAAAAAAAAAAAAABBAAAAABBABBABBAAABABBAAAABAAAABBABAAAAAAA
CN100929	Cultivar	4	Fibre	NETHERLANDS	NLD	Western Europe	WE	51	2.6	GACAACGATATTCGACGGCGTTCGGTCATTTCACCAACACACAAGGCAAACATCACGCGAGACATAG	BAAABABABAAAAAABAABBAABAAAAAAAAABBBAAAAAAAAAABAABBAAAAABAAAAAAAABAA
CN18983	Cultivar	4	Fibre	NETHERLANDS	NLD	Western Europe	WE	49	2.8	AGCGCCAATATTCGTCGGTATTTGGTTGTTTTGTCAACACACGAAGCAGTCTCCACGCGGCACATAG	ABABAAAABAAAAABBAAAAAAAAAABBAAABAABAAAAAAABABBAAAAABBAABAAABBAAABAA
CN18987	Cultivar	4	Fibre	NETHERLANDS	NLD	Western Europe	WE	47	6	AATACGGACATTCGAGCGTATTTGGTCATCATATGAACACACACGGTAGACTTCAGGCAGCGCGTTG	AABAABBAAAAAAAAABAAAAAAAAAAAABBBBAAAAAAAAAABABBAABABAAAAAABBBBABBBA
CN19001	Cultivar	4	Fibre	NETHERLANDS	NLD	Western Europe	WE	49	2	AGCAACGACATTCGTCGACATTTGGTTGTTTTGTCAACACTCGAGGCAGTCACCACGCGACGCAAAG	ABAABABAAAAAAABBABBAAAAAAABBAAABAABAAAAABABAABAAAAAABAABAAAABBAAAAA
CN33390	Cultivar	4	Fibre	NETHERLANDS	NLD	Western Europe	WE	59	3	AATACCAACATTCGTCGGTATTTGGTCATTTCGTCAACACACAAGGTAGTCTTCAGGCGGGACAAAG	AABAAAAAAAAAAABBAAAAAAAAAAAAAAAAAABAAAAAAAAAABBAAAABAAAAAAABAAAAAAA
CN40081	Cultivar	4	Fibre	NETHERLANDS	NLD	Western Europe	WE	60	3.4	AACACCAACATTCGTCGGTATTTGGTCATTTCGTCAACACACAAGGTAGTCTTCAGGCGGGACAAAG	AAAAAAAAAAAAAABBAAAAAAAAAAAAAAAAAABAAAAAAAAAABBAAAABAAAAAAABAAAAAAA
CN98150	Unknown	4	Fibre	NETHERLANDS	NLD	Western Europe	WE	40	4.8	AGCGAGAATGAGCGACGGCGTCCAATCATTTCGCCAACACTGGAGGTGGACTTCAGAAGAGACAAAG	ABABBBAABBBBAAABAABBABBBBAAAAAAAABBAAAAABBBAABBBABABAAAABBAAAAAAAAA
CN101405	Unknown	4	Fibre	ROMANIA	ROM	Central and Eastern Europe	CEE	45	3.6	AGCACCGATGAGCGTCCGTATCTGGTTGATTTGTGAACACACGAGACGGTCACCACGCGGCGCATAG	ABAAAABABBBBAABBBAAAABAAAABBBAABAAAAAAAAAABAAAABAAAABAABAAABBBAABAA
CN101114	Breeding line	4	Fibre	RUSSIAN FEDERATION	RUS	Central and Eastern Europe	CEE	42	5.4	AACGCGAACATTCGACGGTGTCCAACTATCATACCGGTCTACAAGGTGGTCTTCAGGCGAGACAAAG	AAABABAAAAAAAAABAAABABBBBBBAABBBBBBBBBBBAAAAABBBAAABAAAAAAAAAAAAAAA
CN101115	Breeding line	4	Fibre	RUSSIAN FEDERATION	RUS	Central and Eastern Europe	CEE	44	4.2	AACGCGAACATTCGACGGTGTCCAACTATCATACCGGTACACAAGGTGGTCTTCAGGCGAGACAAAG	AAABABAAAAAAAAABAAABABBBBBBAABBBBBBBBBAAAAAAABBBAAABAAAAAAAAAAAAAAA
CN101119	Breeding line	4	Fibre	RUSSIAN FEDERATION	RUS	Central and Eastern Europe	CEE	52	5.2	AGTACCAATGAGCGTCGGTGTTTGGTCATTTCGTCAACACACAAGGTGGACATCACGCGAGACAAAG	ABBAAAAABBBBAABBAAABAAAAAAAAAAAAAABAAAAAAAAAABBBABAAAAABAAAAAAAAAAA
CN101395	Unknown	4	Fibre	RUSSIAN FEDERATION	RUS	Central and Eastern Europe	CEE	40	4.4	AACGCGAACATTCGACGGTGTCCAACTATTATACCGGTACACAAGGTGGTCTTCAGGCGGCGCGTAG	AAABABAAAAAAAAABAAABABBBBBBAAABBBBBBBBAAAAAAABBBAAABAAAAAAABBBABBAA
CN101396	Unknown	4	Fibre	RUSSIAN FEDERATION	RUS	Central and Eastern Europe	CEE	43	5.2	AACGCGAACATTCGACGGTGTCCAACTATCATACCGGTACACAAGGTGGACTTCAGGCGAGACAAAG	AAABABAAAAAAAAABAAABABBBBBBAABBBBBBBBBAAAAAAABBBABABAAAAAAAAAAAAAAA
CN33393	Cultivar	4	Fibre	UNITED KINGDOM	UNK	Northern Europe	NE	59	3.8	AATACCAACATTCGTCGGTGTTTGGTCATTTCGTCAACACACAAGGTAGTCATCACGCGAGACAAAG	AABAAAAAAAAAAABBAAABAAAAAAAAAAAAAABAAAAAAAAAABBAAAAAAAABAAAAAAAAAAA
CN98903	Breeding line	4	Fibre	UNITED STATES	USA	North America	NA	40	4.5	GGTGAGAATGAGCGACCGCGTTTGGTCAATTCGTCAACCTTGGAGACGGACTTCAGAAAAGACAAAG	BBBBBBAABBBBAAABBABBAAAAAAAABAAAAABAAABBBBBAAAABABABAAAABBBAAAAAAAA
CN101367	Unknown	4	Oil	GEORGIA	GEO	Western Aisa	WA	43	1.8	GGCACCGATATTCGACGACGTTCAATCAATACACCGGTACACACGACGGACATCAGAAGAGACAAAG	BBAAAABABAAAAAABABBBAABBBAAABABABBBBBBAAAAABAAABABAAAAAABBAAAAAAAAA
CN101237	Cultivar	4	Fibre	LITHUANIA	LTU	Northern Europe	NE	52	4.2	AATACCGACATTCGAGGGTATCTGGCTGTTTCGTGAACCTACAAGGTAGACTTCAGGCGGCGCAAAG	AABAAABAAAAAAAAAAAAAABAAABBBAAAAAAAAAABBAAAAABBAABABAAAAAAABBBAAAAA
CN98056B	Cultivar	4	Fibre	NETHERLANDS	NLD	Western Europe	WE	44	3.5	AGTGAGAATGAGCGACGGCGTTTAATCATTTCGTCAACACACAAGGTGGACTTCAGAAGAGACAAAC	ABBBBBAABBBBAAABAABBAAABBAAAAAAAAABAAAAAAAAAABBBABABAAAABBAAAAAAAAB
CN101241	Breeding line	4	Fibre	RUSSIAN FEDERATION	RUS	Central and Eastern Europe	CEE	44	4	AACGCGAACATTCGACGGTGTCCAACTATCATACCGGTACACAAGGTGGTCTTCAGGCGAGACAAAG	AAABABAAAAAAAAABAAABABBBBBBAABBBBBBBBBAAAAAAABBBAAABAAAAAAAAAAAAAAA
CN101296	Breeding line	4	Fibre	RUSSIAN FEDERATION	RUS	Central and Eastern Europe	CEE	43	5	AACGCGAACATTCGAGGGTGTCCAACTATCATACGGGTACACAAGGTGGT0TTCAGGCGAGACATTG	AAABABAAAAAAAAAAAAABABBBBBBAABBBBBABBBAAAAAAABBBAA0BAAAAAAAAAAAABBA
CN101298	Breeding line	4	Fibre	RUSSIAN FEDERATION	RUS	Central and Eastern Europe	CEE	44	2.8	AGCAAGAACATTCGAGGGTATCCAACTATCATATGAGTCTACAAGGTGGACTTCAGGCGAGGCAAAG	ABAABBAAAAAAAAAAAAAAABBBBBBAABBBBAAABBBBAAAAABBBABABAAAAAAAAABAAAAA
CN100939	Cultivar	4	Fibre	RUSSIAN FEDERATION	RUS	Central and Eastern Europe	CEE	38	2.4	AACGAGGATAATCGACGACGTTCAATCATCACACCGGTCTTCACGACGGACATCAGAAGAGACAAAG	AAABBBBABABAAAABABBBAABBBAAAABBABBBBBBBBBAABAAABABAAAAAABBAAAAAAAAA
